# Supplementary material for: Effects of extreme meteorological factors and high air pollutant concentrations on the incidence of hand, foot and mouth disease in Jining, China
Source: PeerJ. 2024 May 15;12:e17163. doi: 10.7717/peerj.17163 (PMC11102053; doi:10.7717/peerj.17163)
Supplement: Supplemental Information 1 [file peerj-12-17163-s001.xlsx]

## Sheet: data
Data	Delay1	Delay2	Delay3	time	year	month	Season	doy	dow	holiday	Meantemperature	windspeed	Rain	PM2.5	So	Co	Ozone	numbercases
2017-01-01	0	0	0	1	2017	1	Winter	1	1	0	2.61	1.66	0	183	79	2.3	57	1
2017-01-02	0	0	0	2	2017	1	Winter	2	0	0	3.05	1.41	0	222	56	2.8	16	0
2017-01-03	0	0	0	3	2017	1	Winter	3	0	0	3.06	2.13	0	130	26	2.3	37	0
2017-01-04	0	0	0	4	2017	1	Winter	4	0	0	3.07	1.76	1.02	166	42	3	16	0
2017-01-05	0	0	0	5	2017	1	Winter	5	0	0	3.37	2.38	6.61	155	40	3.2	15	0
2017-01-06	0	0	0	6	2017	1	Winter	6	0	0	3.56	1.34	0.1	140	47	3.9	14	1
2017-01-07	0	0	1	7	2017	1	Winter	7	1	0	2.23	3.21	7.84	124	44	3	21	1
2017-01-08	0	0	0	8	2017	1	Winter	8	1	0	1.26	2.71	0.13	106	36	2.3	34	1
2017-01-09	0	0	0	9	2017	1	Winter	9	0	0	0.08	1.69	0	131	43	3.1	27	0
2017-01-10	0	0	0	10	2017	1	Winter	10	0	0	0.27	1.94	0	129	53	2.9	30	1
2017-01-11	0	0	0	11	2017	1	Winter	11	0	0	0.97	2.14	0	140	58	2.5	43	1
2017-01-12	0	0	0	12	2017	1	Winter	12	0	0	1.53	1.39	0	144	32	2.5	19	0
2017-01-13	0	0	0	13	2017	1	Winter	13	0	0	0.06	2.67	0	101	38	2.2	30	0
2017-01-14	0	0	0	14	2017	1	Winter	14	1	0	-1.13	2.13	0	51	55	1.6	50	2
2017-01-15	0	0	0	15	2017	1	Winter	15	1	0	-1.36	1.66	0	47	40	1.4	46	0
2017-01-16	0	0	0	16	2017	1	Winter	16	0	0	0.32	1.51	0	62	59	1.4	45	0
2017-01-17	0	0	0	17	2017	1	Winter	17	0	0	1.19	1.76	0	54	54	1.3	59	2
2017-01-18	0	0	0	18	2017	1	Winter	18	0	0	1.08	1.52	0	107	64	1.9	38	2
2017-01-19	0	0	0	19	2017	1	Winter	19	0	0	-0.46	4.17	0.05	105	42	1.7	51	1
2017-01-20	0	0	0	20	2017	1	Winter	20	0	0	-3.56	2.26	0	26	26	0.8	54	1
2017-01-21	0	0	0	21	2017	1	Winter	21	1	0	-1.26	3.35	0	44	42	1	48	1
2017-01-22	0	0	0	22	2017	1	Winter	22	1	1	-1.68	1.31	0	68	67	1.5	36	1
2017-01-23	0	0	0	23	2017	1	Winter	23	0	1	-1.99	2.84	0	68	63	1.5	49	1
2017-01-24	0	0	0	24	2017	1	Winter	24	0	1	-0.75	1.91	0	61	44	1.4	70	0
2017-01-25	0	0	0	25	2017	1	Winter	25	0	1	0.67	2.3	0	75	46	1.4	74	2
2017-01-26	0	0	0	26	2017	1	Winter	26	0	1	3.2	4.64	0	89	36	1.3	107	0
2017-01-27	0	0	0	27	2017	1	Winter	27	0	1	0.65	2.38	0	61	38	1.2	98	2
2017-01-28	0	0	0	28	2017	1	Winter	28	1	1	1.05	2.98	3.26	67	30	1	72	1
2017-01-29	0	0	0	29	2017	1	Winter	29	1	1	0.26	4.02	4.04	73	26	1.5	58	0
2017-01-30	0	0	0	30	2017	1	Winter	30	0	1	-2.84	2.23	0	32	30	1.1	75	0
2017-01-31	0	0	0	31	2017	1	Winter	31	0	1	-1.18	1.41	0.76	40	32	1	73	0
2017-02-01	0	1	0	32	2017	2	Winter	1	0	1	-0.25	1.55	0.02	81	33	1.4	94	1
2017-02-02	0	0	0	33	2017	2	Winter	2	0	1	0.48	1.88	0.03	106	38	1.8	92	0
2017-02-03	0	0	0	34	2017	2	Winter	3	0	1	1.9	1.4	0.05	69	27	1.3	75	0
2017-02-04	0	0	0	35	2017	2	Winter	4	1	1	2.44	1.52	0	88	24	1.4	63	0
2017-02-05	0	0	0	36	2017	2	Winter	5	1	1	3.57	1.75	0	149	44	2	75	0
2017-02-06	0	0	0	37	2017	2	Winter	6	0	1	2.21	2.52	0	70	50	1.6	59	0
2017-02-07	2	0	0	38	2017	2	Winter	7	0	1	1.05	1.46	0.02	54	35	1.2	36	1
2017-02-08	0	0	0	39	2017	2	Winter	8	0	1	-0.27	2.12	0.48	66	42	1.5	65	1
2017-02-09	1	0	0	40	2017	2	Winter	9	0	1	-2.41	3.4	0	37	37	1.3	74	0
2017-02-10	0	0	0	41	2017	2	Winter	10	0	1	-0.91	2.76	0	43	44	1.4	82	0
2017-02-11	0	0	0	42	2017	2	Winter	11	1	1	1.87	1.84	0	89	68	1.8	84	0
2017-02-12	0	0	0	43	2017	2	Winter	12	1	0	2.51	2.16	0	142	59	1.6	105	0
2017-02-13	0	0	0	44	2017	2	Winter	13	0	0	5.85	1.17	0	83	64	1.9	103	0
2017-02-14	0	0	0	45	2017	2	Winter	14	0	0	4.82	2.26	0	145	81	2.5	73	0
2017-02-15	0	0	0	46	2017	2	Winter	15	0	0	6.7	3.26	0	105	59	1.7	139	0
2017-02-16	0	1	1	47	2017	2	Winter	16	0	0	9.8	4.44	0.02	89	40	1.4	119	0
2017-02-17	0	0	0	48	2017	2	Winter	17	0	0	2.37	3.03	0	33	32	0.9	66	0
2017-02-18	0	0	0	49	2017	2	Winter	18	1	0	4.71	2.86	0	54	36	1	53	0
2017-02-19	0	0	0	50	2017	2	Winter	19	1	0	10.58	5.32	0.11	97	34	1.4	105	1
2017-02-20	0	0	0	51	2017	2	Winter	20	0	0	3.44	5.05	0	38	32	1.1	82	1
2017-02-21	0	0	0	52	2017	2	Winter	21	0	0	-0.25	3.2	7.98	28	25	0.9	63	0
2017-02-22	0	0	0	53	2017	2	Winter	22	0	0	-0.63	2.68	0.09	90	36	1.4	65	0
2017-02-23	0	0	0	54	2017	2	Winter	23	0	0	2.05	2.3	0	88	49	1.6	88	0
2017-02-24	0	0	0	55	2017	2	Winter	24	0	0	4.37	1.66	0	83	49	1.7	108	0
2017-02-25	0	0	0	56	2017	2	Winter	25	1	0	5.13	1.88	0	106	58	1.8	89	0
2017-02-26	0	0	0	57	2017	2	Winter	26	1	0	6.49	1.41	0	68	59	1.2	102	0
2017-02-27	0	0	0	58	2017	2	Winter	27	0	0	6.57	2.6	0	75	45	1	117	1
2017-02-28	0	1	0	59	2017	2	Winter	28	0	0	7.94	2.69	0.39	71	39	0.9	121	0
2017-03-01	0	0	0	60	2017	3	Spring	1	0	0	3.53	4.01	0.12	44	30	0.9	65	0
2017-03-02	0	0	0	61	2017	3	Spring	2	0	0	3.87	2.02	0	42	32	0.9	97	2
2017-03-03	0	1	0	62	2017	3	Spring	3	0	0	6.58	2.93	0	42	31	0.8	111	0
2017-03-04	0	0	0	63	2017	3	Spring	4	1	0	8.93	1.46	0	69	61	1.3	115	0
2017-03-05	0	0	0	64	2017	3	Spring	5	1	0	7.78	3	0	96	57	1.4	85	0
2017-03-06	0	0	0	65	2017	3	Spring	6	0	0	4.89	2.51	0	47	37	0.9	110	0
2017-03-07	0	1	0	66	2017	3	Spring	7	0	0	3.55	3.2	0	30	28	0.8	86	0
2017-03-08	0	0	0	67	2017	3	Spring	8	0	0	4.55	2.39	0	39	39	1	83	2
2017-03-09	0	0	0	68	2017	3	Spring	9	0	0	6.87	2.06	0	57	44	1.1	96	0
2017-03-10	0	0	0	69	2017	3	Spring	10	0	0	10.6	1.23	0	78	56	1.5	97	0
2017-03-11	0	0	0	70	2017	3	Spring	11	1	0	11.11	1.84	0	95	61	1.2	159	0
2017-03-12	0	0	0	71	2017	3	Spring	12	1	0	9.37	3.16	0	80	48	1.2	99	0
2017-03-13	0	0	0	72	2017	3	Spring	13	0	0	3.94	2.54	0	27	38	0.8	76	0
2017-03-14	0	0	0	73	2017	3	Spring	14	0	0	7.13	0.95	0	43	45	0.9	104	0
2017-03-15	0	0	0	74	2017	3	Spring	15	0	0	8.06	1.74	0	51	45	0.9	115	1
2017-03-16	0	0	1	75	2017	3	Spring	16	0	0	8.57	1.66	0	44	28	0.7	130	1
2017-03-17	0	0	0	76	2017	3	Spring	17	0	0	9.12	2.41	0	59	44	1	143	0
2017-03-18	0	0	0	77	2017	3	Spring	18	1	0	10.83	2.17	0	62	42	0.9	160	1
2017-03-19	0	0	0	78	2017	3	Spring	19	1	0	10.57	2.88	0.29	31	23	0.7	118	1
2017-03-20	0	0	0	79	2017	3	Spring	20	0	0	9.21	2.02	0.62	35	13	0.6	114	1
2017-03-21	0	0	0	80	2017	3	Spring	21	0	0	8.9	2.17	0	85	39	1.1	126	0
2017-03-22	0	0	0	81	2017	3	Spring	22	0	0	8.39	2.59	0.01	27	29	0.7	103	0
2017-03-23	0	0	0	82	2017	3	Spring	23	0	0	8.15	1.95	0.76	33	20	0.6	98	0
2017-03-24	0	0	0	83	2017	3	Spring	24	0	0	7.69	1.78	4.11	49	20	0.8	68	0
2017-03-25	0	0	0	84	2017	3	Spring	25	1	0	8.12	2.47	0.5	56	15	0.8	97	2
2017-03-26	1	0	0	85	2017	3	Spring	26	1	0	8.28	3.08	0	40	23	0.7	96	1
2017-03-27	0	0	0	86	2017	3	Spring	27	0	0	10.49	2.08	0	42	25	0.7	112	4
2017-03-28	0	0	0	87	2017	3	Spring	28	0	0	8.39	3.72	3.05	45	16	0.8	112	0
2017-03-29	0	0	0	88	2017	3	Spring	29	0	0	9.55	1.38	0	61	24	0.9	115	2
2017-03-30	0	0	0	89	2017	3	Spring	30	0	0	10.57	1.46	1.04	61	31	1	68	0
2017-03-31	0	0	0	90	2017	3	Spring	31	0	0	10.01	2.59	0.03	61	20	1	135	3
2017-04-01	0	0	1	91	2017	4	Spring	1	1	0	11.09	2.55	0	61	22	1	131	0
2017-04-02	0	0	0	92	2017	4	Spring	2	1	0	13.83	2.38	0	53	24	0.9	148	2
2017-04-03	0	0	0	93	2017	4	Spring	3	0	0	15.49	2.22	0	44	35	0.8	154	0
2017-04-04	0	0	0	94	2017	4	Spring	4	0	0	13.96	3.26	8.64	47	37	1	86	0
2017-04-05	0	0	0	95	2017	4	Spring	5	0	0	14.04	1.78	0.71	49	11	1	92	1
2017-04-06	0	0	0	96	2017	4	Spring	6	0	0	15.89	0.83	0	62	20	1.1	151	1
2017-04-07	0	0	0	97	2017	4	Spring	7	0	0	16.25	1.71	0	80	35	1.3	172	2
2017-04-08	0	0	0	98	2017	4	Spring	8	1	0	15.08	3.02	0.74	85	39	1.4	59	1
2017-04-09	0	0	0	99	2017	4	Spring	9	1	0	11.52	3.43	0.05	26	17	0.8	100	2
2017-04-10	1	0	0	100	2017	4	Spring	10	0	0	9.3	1.23	1.02	27	24	0.9	64	2
2017-04-11	0	0	0	101	2017	4	Spring	11	0	0	12.23	1.73	0	52	17	0.9	97	1
2017-04-12	0	0	0	102	2017	4	Spring	12	0	0	15.68	2.76	0	60	15	1	139	1
2017-04-13	0	0	1	103	2017	4	Spring	13	0	0	17.19	3.72	6.48	27	12	0.6	122	1
2017-04-14	0	0	0	104	2017	4	Spring	14	0	0	18.08	2.76	1.7	33	17	0.8	89	2
2017-04-15	0	0	0	105	2017	4	Spring	15	1	0	20.93	1.48	0	60	41	1.3	161	2
2017-04-16	0	0	0	106	2017	4	Spring	16	1	0	19.69	2.17	12.04	65	42	1.2	82	4
2017-04-17	0	1	0	107	2017	4	Spring	17	0	0	19.05	3.28	1.13	44	20	0.8	118	3
2017-04-18	0	0	1	108	2017	4	Spring	18	0	0	17.79	3.88	0	32	18	0.5	113	1
2017-04-19	0	0	0	109	2017	4	Spring	19	0	0	16.98	4.36	4.76	30	35	0.7	116	4
2017-04-20	0	1	0	110	2017	4	Spring	20	0	0	15.62	1.82	0	26	19	0.6	111	6
2017-04-21	0	0	0	111	2017	4	Spring	21	0	0	14.02	3.08	0.22	42	20	0.8	113	1
2017-04-22	0	0	0	112	2017	4	Spring	22	1	0	15.87	1.86	0	49	17	0.9	150	2
2017-04-23	0	0	0	113	2017	4	Spring	23	1	0	18.69	4.16	0	28	16	0.6	150	3
2017-04-24	0	0	0	114	2017	4	Spring	24	0	0	19.15	2.84	0	48	22	0.8	161	5
2017-04-25	0	0	0	115	2017	4	Spring	25	0	0	15.13	3.55	3.33	56	25	1	99	3
2017-04-26	0	0	0	116	2017	4	Spring	26	0	0	14.52	2.73	0.01	34	26	0.9	118	2
2017-04-27	1	0	0	117	2017	4	Spring	27	0	0	16.26	2.49	0	32	28	0.7	123	1
2017-04-28	0	0	0	118	2017	4	Spring	28	0	0	18.4	2.64	0	42	26	0.9	149	5
2017-04-29	0	0	0	119	2017	4	Spring	29	1	0	20.9	2.01	0	53	30	1.1	175	3
2017-04-30	1	0	0	120	2017	4	Spring	30	1	0	23.19	2.96	0	37	17	0.7	161	3
2017-05-01	0	0	0	121	2017	5	Spring	1	0	0	22.37	2.08	0	51	37	0.9	180	5
2017-05-02	0	0	0	122	2017	5	Spring	2	0	0	21.75	3.04	0	50	31	1.1	169	2
2017-05-03	0	0	0	123	2017	5	Spring	3	0	0	18.62	3.48	19.05	27	16	0.7	96	5
2017-05-04	0	1	0	124	2017	5	Spring	4	0	0	19.74	2.95	2.16	30	14	0.8	132	3
2017-05-05	0	0	0	125	2017	5	Spring	5	0	0	18.39	3.32	0.04	31	19	0.9	127	7
2017-05-06	0	0	0	126	2017	5	Spring	6	1	0	18.37	2.43	0	35	24	0.9	147	4
2017-05-07	0	0	0	127	2017	5	Spring	7	1	0	20.46	2.08	0	39	18	0.8	154	6
2017-05-08	0	0	0	128	2017	5	Spring	8	0	0	18.99	2	12.21	41	16	1	103	8
2017-05-09	0	0	0	129	2017	5	Spring	9	0	0	19.15	1.68	1.15	44	15	0.8	151	6
2017-05-10	0	0	0	130	2017	5	Spring	10	0	0	23.69	2.82	0	43	18	1	193	8
2017-05-11	0	0	0	131	2017	5	Spring	11	0	0	22.23	2.5	0	49	19	1	134	5
2017-05-12	0	0	0	132	2017	5	Spring	12	0	0	23.43	2.87	0	31	15	0.7	155	4
2017-05-13	1	0	0	133	2017	5	Spring	13	1	0	22.35	3.4	0	44	19	0.6	149	11
2017-05-14	0	0	0	134	2017	5	Spring	14	1	0	20.92	1.36	0	51	39	0.9	150	7
2017-05-15	0	0	0	135	2017	5	Spring	15	0	0	18.72	1.71	0.45	58	41	1.1	125	6
2017-05-16	0	1	0	136	2017	5	Spring	16	0	0	20.33	2.34	0.11	32	18	0.8	151	15
2017-05-17	0	0	0	137	2017	5	Spring	17	0	0	24.01	4.12	0	29	12	0.6	165	14
2017-05-18	0	0	0	138	2017	5	Spring	18	0	0	26.73	4	0	37	17	0.8	190	10
2017-05-19	0	0	0	139	2017	5	Spring	19	0	0	25.22	2.5	0	55	29	1.1	223	19
2017-05-20	0	1	0	140	2017	5	Spring	20	1	0	25.5	2.09	0.06	69	40	1.2	271	17
2017-05-21	0	0	0	141	2017	5	Spring	21	1	0	25.67	2.02	0.07	60	25	0.9	224	20
2017-05-22	2	0	0	142	2017	5	Spring	22	0	0	25.94	2.71	1.95	57	21	1	239	16
2017-05-23	0	0	0	143	2017	5	Spring	23	0	0	19.47	4.34	14.78	23	10	0.9	121	13
2017-05-24	1	0	1	144	2017	5	Spring	24	0	0	22.73	1.4	0	31	19	0.7	167	18
2017-05-25	0	0	0	145	2017	5	Spring	25	0	0	23.9	2.94	0	33	26	0.8	235	24
2017-05-26	0	0	0	146	2017	5	Spring	26	0	0	23.98	2.13	0	27	25	0.7	181	31
2017-05-27	0	0	0	147	2017	5	Spring	27	1	0	27.78	3.66	0	36	16	0.7	213	23
2017-05-28	0	0	0	148	2017	5	Spring	28	1	0	28.84	4.34	0	33	12	0.6	207	30
2017-05-29	0	0	0	149	2017	5	Spring	29	0	0	27.9	2.78	0	36	16	0.7	221	16
2017-05-30	0	0	0	150	2017	5	Spring	30	0	0	27.76	1.34	0.04	55	31	1	268	20
2017-05-31	0	0	0	151	2017	5	Spring	31	0	0	27.73	1.64	0	52	20	1.1	226	16
2017-06-01	0	0	0	152	2017	6	Summer	1	0	0	29.37	2.3	0	57	22	1.1	271	28
2017-06-02	0	0	0	153	2017	6	Summer	2	0	0	27.74	3.41	6.24	36	16	0.7	228	28
2017-06-03	0	0	0	154	2017	6	Summer	3	1	0	22.84	2.92	19.7	44	13	0.9	192	17
2017-06-04	0	0	0	155	2017	6	Summer	4	1	0	21.83	2.38	0	27	15	0.6	189	19
2017-06-05	0	0	1	156	2017	6	Summer	5	0	0	19.49	3.24	5.8	23	10	0.5	105	19
2017-06-06	0	0	0	157	2017	6	Summer	6	0	0	18.84	2.56	10.4	21	6	0.6	92	24
2017-06-07	0	0	0	158	2017	6	Summer	7	0	0	22.28	1.29	0	35	14	0.8	200	21
2017-06-08	0	0	0	159	2017	6	Summer	8	0	0	24.05	2.12	0	39	18	0.9	135	17
2017-06-09	1	0	0	160	2017	6	Summer	9	0	0	26.62	1.54	0	37	17	1	214	24
2017-06-10	0	0	0	161	2017	6	Summer	10	1	0	26.98	1.18	16.95	59	24	1.3	104	35
2017-06-11	0	0	0	162	2017	6	Summer	11	1	0	25.53	1.5	0.42	55	23	1.1	195	21
2017-06-12	0	0	0	163	2017	6	Summer	12	0	0	24.8	2.69	0.6	28	27	0.7	180	13
2017-06-13	0	0	0	164	2017	6	Summer	13	0	0	23.31	1.83	0.08	34	22	0.8	254	23
2017-06-14	0	0	0	165	2017	6	Summer	14	0	0	25.44	0.98	0	55	28	1	278	37
2017-06-15	0	0	0	166	2017	6	Summer	15	0	0	26.65	1.71	0	76	20	1.2	239	40
2017-06-16	0	0	0	167	2017	6	Summer	16	0	0	27.28	1.65	0	50	15	0.9	250	28
2017-06-17	0	0	0	168	2017	6	Summer	17	1	0	27.19	2.77	0	42	20	0.7	246	30
2017-06-18	0	0	1	169	2017	6	Summer	18	1	0	25.96	3.09	0	39	22	0.8	262	26
2017-06-19	0	0	0	170	2017	6	Summer	19	0	0	27.54	2.44	0	39	24	0.8	217	39
2017-06-20	0	0	0	171	2017	6	Summer	20	0	0	27.47	1.44	4.47	55	24	1	238	41
2017-06-21	0	0	0	172	2017	6	Summer	21	0	0	26.62	2.33	4.28	47	22	0.9	222	33
2017-06-22	0	0	0	173	2017	6	Summer	22	0	0	26.63	2.79	11.04	41	18	1	176	36
2017-06-23	0	0	0	174	2017	6	Summer	23	0	0	26.57	1.83	7.37	27	11	0.9	121	18
2017-06-24	0	0	0	175	2017	6	Summer	24	1	0	25.65	2.45	5.62	30	15	0.9	172	48
2017-06-25	0	0	0	176	2017	6	Summer	25	1	0	25.28	2.48	0	28	19	0.8	180	33
2017-06-26	0	0	0	177	2017	6	Summer	26	0	0	27.76	1.51	0	37	25	0.9	217	40
2017-06-27	1	0	0	178	2017	6	Summer	27	0	0	28.5	1.24	0	50	26	1	248	57
2017-06-28	0	0	0	179	2017	6	Summer	28	0	0	29.28	2.17	0.98	55	20	1	238	48
2017-06-29	0	0	0	180	2017	6	Summer	29	0	0	29.01	1.96	4.71	52	22	1	225	38
2017-06-30	1	0	0	181	2017	6	Summer	30	0	0	27.66	2.2	13.33	62	21	1.1	233	32
2017-07-01	0	0	0	182	2017	7	Summer	1	1	0	27.8	1.34	0.07	51	21	1	219	49
2017-07-02	0	0	0	183	2017	7	Summer	2	1	0	28.68	1.17	0.12	27	15	0.7	177	44
2017-07-03	0	0	0	184	2017	7	Summer	3	0	0	30.64	1.28	0	32	15	0.9	230	31
2017-07-04	0	0	0	185	2017	7	Summer	4	0	0	30.69	1.19	4.96	41	18	0.9	206	36
2017-07-05	0	0	0	186	2017	7	Summer	5	0	0	29.76	1.27	5.14	46	26	1.1	193	33
2017-07-06	0	0	0	187	2017	7	Summer	6	0	0	27.75	3.01	77.19	19	18	0.8	73	73
2017-07-07	0	0	0	188	2017	7	Summer	7	0	0	28.44	2.62	25.27	19	14	0.8	145	64
2017-07-08	0	0	0	189	2017	7	Summer	8	1	0	29.19	3.34	0.02	20	13	0.7	128	55
2017-07-09	0	0	0	190	2017	7	Summer	9	1	0	26.9	3.15	0.33	18	14	0.7	66	49
2017-07-10	0	0	0	191	2017	7	Summer	10	0	0	27.63	1.94	0.03	19	14	0.8	162	87
2017-07-11	0	0	0	192	2017	7	Summer	11	0	0	29.58	2.61	0	21	12	0.8	165	57
2017-07-12	0	0	0	193	2017	7	Summer	12	0	0	30.19	3.38	0	21	11	0.8	132	55
2017-07-13	0	0	0	194	2017	7	Summer	13	0	0	30.39	3.46	1.21	19	12	0.7	151	71
2017-07-14	0	0	0	195	2017	7	Summer	14	0	0	29.12	2.92	8.82	19	13	0.7	129	72
2017-07-15	0	0	0	196	2017	7	Summer	15	1	0	27.12	1.24	26.57	14	11	0.7	65	67
2017-07-16	0	0	0	197	2017	7	Summer	16	1	0	27.56	1.51	10.64	32	11	0.9	113	66
2017-07-17	0	0	0	198	2017	7	Summer	17	0	0	27.51	1.75	2.04	45	12	0.9	152	75
2017-07-18	0	0	0	199	2017	7	Summer	18	0	0	28.39	1.76	17.55	21	12	0.8	137	78
2017-07-19	0	0	0	200	2017	7	Summer	19	0	0	28.39	2.56	16.9	17	12	0.7	120	73
2017-07-20	0	0	0	201	2017	7	Summer	20	0	0	29.99	3.09	0.82	23	12	0.7	125	50
2017-07-21	0	0	0	202	2017	7	Summer	21	0	0	30.15	2.62	0.12	20	12	0.7	138	58
2017-07-22	0	0	0	203	2017	7	Summer	22	1	0	30.61	1.89	0.02	32	10	0.8	141	66
2017-07-23	0	0	0	204	2017	7	Summer	23	1	0	31.94	1.54	0.4	37	12	0.9	143	65
2017-07-24	0	0	0	205	2017	7	Summer	24	0	0	32.12	1.91	1.6	44	14	1	160	40
2017-07-25	0	0	0	206	2017	7	Summer	25	0	0	29.37	2.23	2.45	70	21	1.8	146	40
2017-07-26	0	0	0	207	2017	7	Summer	26	0	0	30.11	2.54	7.68	43	15	1.1	166	34
2017-07-27	0	0	0	208	2017	7	Summer	27	0	0	28.6	1.73	18.98	43	18	1.3	97	29
2017-07-28	0	0	0	209	2017	7	Summer	28	0	0	25.62	2.84	3.55	47	15	1.7	124	32
2017-07-29	0	0	0	210	2017	7	Summer	29	1	0	25.45	1.47	5.4	44	17	0.9	58	30
2017-07-30	0	0	0	211	2017	7	Summer	30	1	0	26.18	1.08	7.02	43	21	1.2	72	25
2017-07-31	0	0	0	212	2017	7	Summer	31	0	0	26.82	2.67	5.07	33	16	1	64	35
2017-08-01	0	0	0	213	2017	8	Summer	1	0	0	28.6	3.7	5.34	16	15	0.8	115	61
2017-08-02	0	0	0	214	2017	8	Summer	2	0	0	27.99	2.71	30.01	15	12	0.7	98	27
2017-08-03	0	0	0	215	2017	8	Summer	3	0	0	29.55	0.79	7.53	24	16	1	131	32
2017-08-04	0	0	0	216	2017	8	Summer	4	0	0	30.12	1.48	0.31	38	21	1.2	181	30
2017-08-05	0	0	0	217	2017	8	Summer	5	1	0	30.06	1.12	0.5	50	16	1	177	25
2017-08-06	0	0	0	218	2017	8	Summer	6	1	0	30.35	1.26	1.42	54	16	1	176	30
2017-08-07	0	0	0	219	2017	8	Summer	7	0	0	30.05	0.8	0.88	34	20	0.9	222	31
2017-08-08	0	0	0	220	2017	8	Summer	8	0	0	28.51	0.72	0.25	28	18	0.9	182	28
2017-08-09	0	0	0	221	2017	8	Summer	9	0	0	27.55	1.51	0.69	35	15	0.9	163	30
2017-08-10	0	0	0	222	2017	8	Summer	10	0	0	28.26	0.84	0.1	49	22	1.1	252	17
2017-08-11	0	0	0	223	2017	8	Summer	11	0	0	29.11	2.2	0	43	18	1.1	192	22
2017-08-12	0	0	0	224	2017	8	Summer	12	1	0	28.26	2.29	1.76	38	17	1	133	22
2017-08-13	0	0	0	225	2017	8	Summer	13	1	0	25.8	2.38	1.41	24	18	0.9	147	18
2017-08-14	0	0	0	226	2017	8	Summer	14	0	0	25.9	3.24	0.65	22	18	0.8	119	24
2017-08-15	0	0	0	227	2017	8	Summer	15	0	0	26.5	1.65	0.02	22	19	0.9	160	25
2017-08-16	0	1	0	228	2017	8	Summer	16	0	0	27.91	1.55	0.1	42	20	1	184	16
2017-08-17	0	0	0	229	2017	8	Summer	17	0	0	28.31	1.2	0.41	39	17	1	191	11
2017-08-18	0	0	0	230	2017	8	Summer	18	0	0	28.31	2.12	5.78	37	23	1.1	165	22
2017-08-19	0	0	0	231	2017	8	Summer	19	1	0	27.6	1.19	8.34	22	14	1	129	28
2017-08-20	0	0	0	232	2017	8	Summer	20	1	0	27.33	1.22	0.8	31	19	1.1	162	23
2017-08-21	0	0	0	233	2017	8	Summer	21	0	0	28.58	1.02	0	45	19	1.1	184	27
2017-08-22	0	0	0	234	2017	8	Summer	22	0	0	28.87	2.77	0.01	42	17	1.1	174	19
2017-08-23	0	0	0	235	2017	8	Summer	23	0	0	30.04	1.76	0.28	34	15	1	149	9
2017-08-24	0	0	0	236	2017	8	Summer	24	0	0	29.41	2.25	0.21	35	20	1.1	162	19
2017-08-25	0	0	0	237	2017	8	Summer	25	0	0	27.69	1.48	0	32	25	1.2	147	14
2017-08-26	0	0	0	238	2017	8	Summer	26	1	0	26.7	1.74	0	28	21	0.9	134	21
2017-08-27	0	0	0	239	2017	8	Summer	27	1	0	26.55	2.61	0.34	25	23	0.8	171	13
2017-08-28	0	0	0	240	2017	8	Summer	28	0	0	24.4	3.05	2.4	26	15	0.9	120	13
2017-08-29	0	0	0	241	2017	8	Summer	29	0	0	22.13	2.72	3.1	22	16	1	60	10
2017-08-30	0	0	0	242	2017	8	Summer	30	0	0	18.51	1.48	19.67	18	11	0.6	81	8
2017-08-31	0	0	0	243	2017	8	Summer	31	0	0	20.51	1.13	0.05	23	14	0.7	123	16
2017-09-01	0	0	0	244	2017	9	Autumn	1	0	0	22.3	1.43	0.03	28	15	1	127	16
2017-09-02	0	0	0	245	2017	9	Autumn	2	1	0	23.12	1.75	0.05	35	20	0.9	142	8
2017-09-03	0	0	0	246	2017	9	Autumn	3	1	0	21.79	1.77	0.87	36	16	0.9	87	10
2017-09-04	0	0	0	247	2017	9	Autumn	4	0	0	22.47	2.09	2.82	20	13	0.7	102	7
2017-09-05	0	0	0	248	2017	9	Autumn	5	0	0	24.18	1.26	6.33	20	14	0.8	101	10
2017-09-06	0	0	0	249	2017	9	Autumn	6	0	0	23.13	1.21	7.38	21	12	0.7	131	3
2017-09-07	0	0	0	250	2017	9	Autumn	7	0	0	23.88	2.16	0.32	29	14	0.7	142	7
2017-09-08	0	0	0	251	2017	9	Autumn	8	0	0	24.15	2.05	0	37	17	0.9	161	9
2017-09-09	0	0	0	252	2017	9	Autumn	9	1	0	24.74	1.34	1.67	47	26	1.2	188	15
2017-09-10	0	0	0	253	2017	9	Autumn	10	1	0	20.75	1.8	8.34	34	15	0.9	70	7
2017-09-11	0	1	0	254	2017	9	Autumn	11	0	0	22.75	1.38	0	32	24	1.2	176	14
2017-09-12	0	0	0	255	2017	9	Autumn	12	0	0	24.15	1.3	0	48	24	1.2	236	15
2017-09-13	0	0	0	256	2017	9	Autumn	13	0	0	22.93	2.36	0	33	25	0.9	171	8
2017-09-14	0	0	0	257	2017	9	Autumn	14	0	0	22.79	1.67	0	26	22	0.8	163	11
2017-09-15	0	0	0	258	2017	9	Autumn	15	0	0	23.87	1.72	0	53	20	1.2	214	17
2017-09-16	0	0	0	259	2017	9	Autumn	16	1	0	23.34	1.16	0.05	44	26	1.1	136	11
2017-09-17	0	0	0	260	2017	9	Autumn	17	1	0	24.81	1.09	0	57	21	1.3	220	8
2017-09-18	0	0	0	261	2017	9	Autumn	18	0	0	24.44	2.11	0	57	20	1.1	205	16
2017-09-19	0	0	0	262	2017	9	Autumn	19	0	0	25.31	1.15	0	59	24	1.1	196	8
2017-09-20	0	0	0	263	2017	9	Autumn	20	0	0	24.22	2.44	0	41	25	1	199	8
2017-09-21	0	0	0	264	2017	9	Autumn	21	0	0	23.77	2.97	0.01	44	27	1	180	17
2017-09-22	0	0	0	265	2017	9	Autumn	22	0	0	24.08	2.1	0.01	38	18	0.9	184	15
2017-09-23	0	0	0	266	2017	9	Autumn	23	1	0	24.53	2.12	0.05	51	29	1.2	220	9
2017-09-24	0	0	0	267	2017	9	Autumn	24	1	0	24.3	2.36	0.09	41	22	1	168	10
2017-09-25	0	0	0	268	2017	9	Autumn	25	0	0	23.55	2.23	2.89	32	17	0.9	85	11
2017-09-26	0	0	0	269	2017	9	Autumn	26	0	0	23.69	2.1	4.15	33	16	1.1	84	6
2017-09-27	0	0	0	270	2017	9	Autumn	27	0	0	22.02	2.32	0.27	30	16	1	104	20
2017-09-28	0	0	0	271	2017	9	Autumn	28	0	0	19.37	2.01	0	29	19	1	139	9
2017-09-29	0	0	0	272	2017	9	Autumn	29	0	0	19.81	2.54	0	45	17	0.9	134	12
2017-09-30	0	0	0	273	2017	9	Autumn	30	1	0	20.9	3.43	26.55	40	21	1.1	165	7
2017-10-01	0	0	0	274	2017	10	Autumn	1	1	0	21.44	2.01	4.08	22	10	1	63	13
2017-10-02	0	0	0	275	2017	10	Autumn	2	0	0	20.52	2.83	0.01	26	12	0.7	115	9
2017-10-03	0	0	0	276	2017	10	Autumn	3	0	0	15.3	3	3.04	21	12	0.9	44	8
2017-10-04	0	0	0	277	2017	10	Autumn	4	0	0	13.83	1.33	0	33	19	1.2	52	9
2017-10-05	0	0	0	278	2017	10	Autumn	5	0	0	14.9	1.34	0.68	38	25	1.1	83	10
2017-10-06	0	0	0	279	2017	10	Autumn	6	0	0	16.17	0.76	0	45	21	0.9	126	18
2017-10-07	0	0	0	280	2017	10	Autumn	7	1	0	17.65	1.8	0.83	46	22	1.3	83	19
2017-10-08	0	0	0	281	2017	10	Autumn	8	1	0	21.03	1.57	1.64	64	26	1.3	96	10
2017-10-09	0	0	0	282	2017	10	Autumn	9	0	0	21.84	2.17	0.67	53	17	1.6	103	4
2017-10-10	0	0	0	283	2017	10	Autumn	10	0	0	15.68	4.34	17.85	18	8	0.8	27	8
2017-10-11	0	0	0	284	2017	10	Autumn	11	0	0	12.19	2.51	2.17	23	12	0.8	65	12
2017-10-12	0	0	0	285	2017	10	Autumn	12	0	0	12.75	0.84	1.5	39	13	1.1	93	10
2017-10-13	0	0	0	286	2017	10	Autumn	13	0	0	13.62	0.95	0	45	18	1.1	107	10
2017-10-14	0	0	0	287	2017	10	Autumn	14	1	0	14.01	1.58	0	55	20	1.3	111	8
2017-10-15	0	0	0	288	2017	10	Autumn	15	1	0	15.64	1.63	0.16	40	18	0.8	90	14
2017-10-16	0	0	0	289	2017	10	Autumn	16	0	0	16.61	2.09	0.02	68	27	1.4	91	7
2017-10-17	0	0	0	290	2017	10	Autumn	17	0	0	15.92	1.09	4.11	70	22	1.6	73	11
2017-10-18	0	0	0	291	2017	10	Autumn	18	0	0	15.19	0.98	1.07	39	12	1	92	17
2017-10-19	0	0	0	292	2017	10	Autumn	19	0	0	15.4	0.88	0	47	17	1.3	112	8
2017-10-20	0	0	0	293	2017	10	Autumn	20	0	0	16.17	0.82	0	64	16	1.6	153	11
2017-10-21	0	0	0	294	2017	10	Autumn	21	1	0	16.83	0.76	0	60	13	1.4	166	9
2017-10-22	0	0	0	295	2017	10	Autumn	22	1	0	15.24	2.27	0	63	18	1.3	92	10
2017-10-23	0	0	0	296	2017	10	Autumn	23	0	0	11.9	1.99	0	27	22	1	89	13
2017-10-24	0	0	0	297	2017	10	Autumn	24	0	0	11.94	1.15	0	41	30	1.1	124	13
2017-10-25	0	1	0	298	2017	10	Autumn	25	0	0	12.33	1.62	0	50	45	1.2	90	10
2017-10-26	0	0	0	299	2017	10	Autumn	26	0	0	14.09	1.39	0	53	32	1.2	132	13
2017-10-27	0	0	0	300	2017	10	Autumn	27	0	0	15.35	1.35	0	83	38	1.4	154	12
2017-10-28	0	0	0	301	2017	10	Autumn	28	1	0	15.52	2.11	0	69	27	1.3	154	9
2017-10-29	0	0	0	302	2017	10	Autumn	29	1	0	8.4	3.98	0	14	13	0.4	70	6
2017-10-30	0	0	0	303	2017	10	Autumn	30	0	0	7.79	1.38	0	36	25	0.7	83	11
2017-10-31	0	0	0	304	2017	10	Autumn	31	0	0	10.05	2.59	0.01	48	34	0.8	77	12
2017-11-01	0	0	0	305	2017	11	Autumn	1	0	0	12.33	2.02	0.06	68	43	1.3	68	15
2017-11-02	0	0	0	306	2017	11	Autumn	2	0	0	14.49	2.34	0	83	36	1.4	106	11
2017-11-03	0	0	1	307	2017	11	Autumn	3	0	0	10.94	3.41	0	51	17	1	91	9
2017-11-04	0	0	0	308	2017	11	Autumn	4	1	0	7.56	1.3	0	30	26	0.8	89	9
2017-11-05	0	0	0	309	2017	11	Autumn	5	1	0	9.11	3.02	0	40	27	0.8	89	12
2017-11-06	0	0	0	310	2017	11	Autumn	6	0	0	11.49	2.63	0	58	35	1.1	117	3
2017-11-07	0	0	0	311	2017	11	Autumn	7	0	0	12.66	2	0	79	37	1.3	93	11
2017-11-08	0	0	0	312	2017	11	Autumn	8	0	0	11.95	2.52	0	83	38	1.5	112	11
2017-11-09	0	0	0	313	2017	11	Autumn	9	0	0	13.58	4.06	0.06	31	27	0.8	104	13
2017-11-10	0	0	0	314	2017	11	Autumn	10	0	0	11.04	4.19	1.18	27	17	0.7	72	13
2017-11-11	0	1	0	315	2017	11	Autumn	11	1	0	6.98	1.34	0	28	23	0.7	66	11
2017-11-12	0	1	0	316	2017	11	Autumn	12	1	0	8.69	2	0.01	63	31	0.9	99	11
2017-11-13	0	0	0	317	2017	11	Autumn	13	0	0	9.8	2.33	0	66	29	1.2	69	14
2017-11-14	0	0	0	318	2017	11	Autumn	14	0	0	7.26	2.18	0	51	30	1	67	3
2017-11-15	0	0	1	319	2017	11	Autumn	15	0	0	6.43	1.97	0	69	40	1.2	66	13
2017-11-16	0	0	0	320	2017	11	Autumn	16	0	0	8.91	2.75	0.08	57	27	1.1	63	13
2017-11-17	0	0	0	321	2017	11	Autumn	17	0	0	9.29	3.78	0.28	66	21	1.3	44	15
2017-11-18	0	1	0	322	2017	11	Autumn	18	1	0	0.42	3.22	0	21	12	0.5	65	9
2017-11-19	0	0	0	323	2017	11	Autumn	19	1	0	0.48	1.48	0.19	57	21	0.8	37	3
2017-11-20	0	0	0	324	2017	11	Autumn	20	0	0	2.61	1.13	0.12	94	10	1	27	7
2017-11-21	0	0	0	325	2017	11	Autumn	21	0	0	4.37	2.41	0	76	14	1	90	11
2017-11-22	0	0	0	326	2017	11	Autumn	22	0	0	5	2.41	0	132	19	1	71	9
2017-11-23	0	1	0	327	2017	11	Autumn	23	0	0	2.97	2.12	0	64	24	1.2	67	4
2017-11-24	0	0	0	328	2017	11	Autumn	24	0	0	2.2	2.48	0	47	24	0.9	59	7
2017-11-25	0	0	0	329	2017	11	Autumn	25	1	0	4.62	2.47	0	94	24	1.1	55	9
2017-11-26	0	0	0	330	2017	11	Autumn	26	1	0	3.88	3.27	0	66	25	0.9	68	11
2017-11-27	0	0	0	331	2017	11	Autumn	27	0	0	4.76	3.51	0	57	27	1	68	9
2017-11-28	0	0	0	332	2017	11	Autumn	28	0	0	6.8	3.14	0	99	25	1.3	68	6
2017-11-29	0	0	0	333	2017	11	Autumn	29	0	0	2.69	2.69	0.02	34	24	1	41	5
2017-11-30	0	0	0	334	2017	11	Autumn	30	0	0	1.8	1.31	0.03	82	28	1.5	69	2
2017-12-01	0	0	0	335	2017	12	Winter	1	0	0	0.9	1.67	0	138	36	1.2	46	12
2017-12-02	0	0	0	336	2017	12	Winter	2	1	0	3.62	2.8	0	114	24	1.5	72	4
2017-12-03	0	0	0	337	2017	12	Winter	3	1	0	3.89	2.03	0	168	33	1.2	70	8
2017-12-04	0	1	0	338	2017	12	Winter	4	0	0	0.16	2.94	0	69	20	1.2	60	8
2017-12-05	0	0	0	339	2017	12	Winter	5	0	0	-0.1	2	0	65	24	1.5	40	5
2017-12-06	0	0	0	340	2017	12	Winter	6	0	0	1.8	2.08	0	150	22	1.2	42	10
2017-12-07	0	0	0	341	2017	12	Winter	7	0	0	2.08	2.2	0	124	30	2.2	40	3
2017-12-08	0	0	0	342	2017	12	Winter	8	0	0	-0.46	1.91	0	46	24	1	50	3
2017-12-09	0	0	0	343	2017	12	Winter	9	1	0	1.69	2.95	0	74	24	1.2	52	3
2017-12-10	0	0	0	344	2017	12	Winter	10	1	0	1.28	2.7	0	72	34	1.5	37	6
2017-12-11	0	0	0	345	2017	12	Winter	11	0	0	0.6	2.42	0	70	49	1.7	20	6
2017-12-12	0	0	0	346	2017	12	Winter	12	0	0	-1.73	2.25	0	39	30	0.9	80	1
2017-12-13	0	0	0	347	2017	12	Winter	13	0	0	-0.16	2.17	0.03	51	23	1	50	7
2017-12-14	0	0	0	348	2017	12	Winter	14	0	0	0.36	1.16	1.04	80	18	1.2	38	5
2017-12-15	0	0	0	349	2017	12	Winter	15	0	0	0.67	1.71	0.04	118	23	1.4	24	6
2017-12-16	1	0	0	350	2017	12	Winter	16	1	0	-2.31	2.92	0	59	19	1	77	2
2017-12-17	0	0	0	351	2017	12	Winter	17	1	0	-1.22	2	0	53	24	1	63	4
2017-12-18	0	0	0	352	2017	12	Winter	18	0	0	0.29	1.95	0	69	29	1	46	4
2017-12-19	0	0	0	353	2017	12	Winter	19	0	0	0.15	1.77	0	71	36	1.2	41	5
2017-12-20	0	0	0	354	2017	12	Winter	20	0	0	1.39	1.76	0	76	30	1.4	53	4
2017-12-21	0	0	0	355	2017	12	Winter	21	0	0	1.71	2.7	0	68	44	1	63	7
2017-12-22	0	0	0	356	2017	12	Winter	22	0	0	3.44	2.08	0	123	44	1.5	51	6
2017-12-23	0	0	0	357	2017	12	Winter	23	1	0	2.87	1.48	0	206	60	2.5	17	5
2017-12-24	0	0	0	358	2017	12	Winter	24	1	0	0.88	3.32	0	63	27	1.2	73	4
2017-12-25	0	1	0	359	2017	12	Winter	25	0	0	0.37	1.88	0	62	34	1	65	0
2017-12-26	0	0	0	360	2017	12	Winter	26	0	0	1.26	1.66	0	107	56	1.5	36	6
2017-12-27	0	0	0	361	2017	12	Winter	27	0	0	1.93	3.13	0	70	33	1.2	71	1
2017-12-28	0	0	0	362	2017	12	Winter	28	0	0	4.9	1.77	0	97	31	1.4	56	0
2017-12-29	0	0	0	363	2017	12	Winter	29	0	0	3.44	1.29	0	202	27	2.9	13	0
2017-12-30	0	0	0	364	2017	12	Winter	30	1	0	2.56	2.28	0.01	197	21	2.3	29	3
2017-12-31	0	0	0	365	2017	12	Winter	31	1	0	0.62	1.67	0	140	30	1.9	57	6
2018-01-01	0	0	0	366	2018	1	Winter	1	0	0	1.9	2.61	0	167	44	1.9	47	2
2018-01-02	0	1	0	367	2018	1	Winter	2	0	0	1.93	2.93	0	178	30	2	23	2
2018-01-03	0	0	0	368	2018	1	Winter	3	0	0	-0.68	3.1	0.11	38	22	0.9	33	5
2018-01-04	0	0	0	369	2018	1	Winter	4	0	0	-2.33	1.84	3.81	36	18	0.8	29	5
2018-01-05	0	0	0	370	2018	1	Winter	5	0	0	-1.92	1.29	0	82	23	1.1	48	3
2018-01-06	0	0	0	371	2018	1	Winter	6	1	0	-0.19	1.27	0.21	125	30	1.5	36	0
2018-01-07	0	0	0	372	2018	1	Winter	7	1	0	-0.58	1.4	1.1	97	23	1.2	31	0
2018-01-08	0	0	0	373	2018	1	Winter	8	0	0	-2.27	4.3	0	74	17	1	69	2
2018-01-09	0	0	0	374	2018	1	Winter	9	0	0	-1.97	3.5	0	31	21	0.7	67	0
2018-01-10	0	0	0	375	2018	1	Winter	10	0	0	-2.92	2.36	0	36	22	0.8	62	0
2018-01-11	0	0	0	376	2018	1	Winter	11	0	1	-6.04	3.31	0	32	22	0.6	63	0
2018-01-12	0	0	0	377	2018	1	Winter	12	0	1	-5.65	2.15	0	44	23	0.7	56	1
2018-01-13	0	0	0	378	2018	1	Winter	13	1	1	-2.57	2.77	0	67	29	0.9	58	1
2018-01-14	0	0	0	379	2018	1	Winter	14	1	1	1.65	2.88	0	85	28	1.3	54	2
2018-01-15	0	0	0	380	2018	1	Winter	15	0	1	2.39	1.9	0	135	44	1.9	43	3
2018-01-16	0	0	0	381	2018	1	Winter	16	0	1	1.73	1.18	0.11	215	44	2.6	17	2
2018-01-17	0	0	0	382	2018	1	Winter	17	0	0	2.28	2.2	0.16	174	17	1.8	49	1
2018-01-18	0	0	0	383	2018	1	Winter	18	0	0	2.52	1.25	0	241	29	2.2	78	2
2018-01-19	0	0	0	384	2018	1	Winter	19	0	0	2.78	2.08	0	156	21	1.5	100	2
2018-01-20	0	0	0	385	2018	1	Winter	20	1	0	1.87	2.02	0	156	26	1.8	60	1
2018-01-21	0	0	0	386	2018	1	Winter	21	1	0	0.78	1.04	0	192	22	2.3	27	1
2018-01-22	0	0	0	387	2018	1	Winter	22	0	0	-0.55	2.61	0.01	78	15	1.1	29	1
2018-01-23	0	0	0	388	2018	1	Winter	23	0	0	-3.57	3.05	0	51	20	0.9	67	0
2018-01-24	0	0	0	389	2018	1	Winter	24	0	0	-3.52	2.42	0.01	63	27	1	51	1
2018-01-25	0	0	0	390	2018	1	Winter	25	0	0	-4.05	2.7	0.04	44	24	0.9	52	0
2018-01-26	0	0	0	391	2018	1	Winter	26	0	0	-4.97	2.03	0.01	63	29	0.9	51	0
2018-01-27	0	0	0	392	2018	1	Winter	27	1	0	-3.69	1.14	2.42	80	35	1	31	1
2018-01-28	0	0	0	393	2018	1	Winter	28	1	0	-4.56	2.67	0.03	129	30	1.2	60	0
2018-01-29	0	0	0	394	2018	1	Winter	29	0	0	-5.22	1.99	0	139	29	1.4	64	2
2018-01-30	0	0	0	395	2018	1	Winter	30	0	0	-2.08	1.31	0	63	38	1.2	61	2
2018-01-31	0	0	0	396	2018	1	Winter	31	0	0	-0.03	1.05	0	85	45	1.5	46	0
2018-02-01	0	0	0	397	2018	2	Winter	1	0	0	-0.7	2.02	0	72	39	1.3	70	2
2018-02-02	0	1	0	398	2018	2	Winter	2	0	0	-3.19	4.41	0	37	18	0.8	70	0
2018-02-03	0	0	0	399	2018	2	Winter	3	1	0	-4.03	1.57	0	42	23	0.9	67	0
2018-02-04	0	0	0	400	2018	2	Winter	4	1	0	-3.08	1.59	0	78	36	1.2	62	1
2018-02-05	0	0	0	401	2018	2	Winter	5	0	0	-2.74	2.97	0	81	29	1.2	60	0
2018-02-06	0	0	0	402	2018	2	Winter	6	0	0	-3.52	2.34	0	48	31	0.9	58	1
2018-02-07	0	0	0	403	2018	2	Winter	7	0	0	-1.84	3.62	0	50	24	0.9	68	1
2018-02-08	0	0	0	404	2018	2	Winter	8	0	0	-2.25	2.57	0	54	27	1	68	0
2018-02-09	0	0	0	405	2018	2	Winter	9	0	0	1.8	3.1	0	75	40	1.3	59	1
2018-02-10	0	0	0	406	2018	2	Winter	10	1	0	-0.36	2.83	0	42	25	0.7	62	1
2018-02-11	0	0	0	407	2018	2	Winter	11	1	0	-1.43	3.27	0	64	31	0.8	74	0
2018-02-12	0	0	1	408	2018	2	Winter	12	0	0	-1.23	2.62	0	55	29	0.7	80	0
2018-02-13	0	0	0	409	2018	2	Winter	13	0	0	3.08	4.25	0	64	18	0.7	116	0
2018-02-14	0	0	0	410	2018	2	Winter	14	0	0	2.79	2.95	0	70	22	1	79	0
2018-02-15	0	0	0	411	2018	2	Winter	15	0	0	0.78	2.08	0	35	24	0.5	84	0
2018-02-16	0	0	0	412	2018	2	Winter	16	0	1	3.27	1.81	0	104	44	0.8	72	1
2018-02-17	0	0	0	413	2018	2	Winter	17	1	1	2.75	3.49	0	92	30	1	111	0
2018-02-18	0	0	0	414	2018	2	Winter	18	1	1	3.83	2.26	0	34	17	0.6	82	0
2018-02-19	0	0	0	415	2018	2	Winter	19	0	1	3.63	1.38	0	36	20	0.8	89	0
2018-02-20	0	0	0	416	2018	2	Winter	20	0	1	2.53	1.4	0.15	79	20	1.1	74	0
2018-02-21	0	0	0	417	2018	2	Winter	21	0	1	2.35	1.3	1.19	103	13	1.4	51	1
2018-02-22	0	0	0	418	2018	2	Winter	22	0	1	3.82	3.6	0.05	69	16	1	90	0
2018-02-23	0	0	0	419	2018	2	Winter	23	0	1	6.71	3.03	0	56	16	0.9	91	0
2018-02-24	0	0	0	420	2018	2	Winter	24	1	1	3.55	3.48	0.05	52	20	0.9	56	1
2018-02-25	0	0	0	421	2018	2	Winter	25	1	1	3.48	2.01	0	54	19	0.9	79	1
2018-02-26	0	0	0	422	2018	2	Winter	26	0	1	7.93	3.52	0	63	18	1	94	3
2018-02-27	0	0	0	423	2018	2	Winter	27	0	1	8.72	2.36	1.2	73	38	1.4	83	1
2018-02-28	0	0	0	424	2018	2	Winter	28	0	1	7.9	3.03	0.68	94	13	1.3	84	0
2018-03-01	0	1	0	425	2018	3	Spring	1	0	1	5.53	2.95	0	32	15	0.7	75	2
2018-03-02	0	0	0	426	2018	3	Spring	2	0	1	6.18	3.51	0.07	43	18	0.9	89	2
2018-03-03	0	0	0	427	2018	3	Spring	3	1	0	9.4	3.52	0.82	58	14	1	54	0
2018-03-04	0	0	0	428	2018	3	Spring	4	1	0	6.68	5.32	20.08	28	11	1.1	40	3
2018-03-05	0	1	1	429	2018	3	Spring	5	0	0	3.53	3.38	0	26	17	0.8	82	0
2018-03-06	0	0	0	430	2018	3	Spring	6	0	0	3.94	1.94	0.38	36	25	0.8	70	0
2018-03-07	0	0	0	431	2018	3	Spring	7	0	0	3.94	1.59	0.03	29	13	0.8	76	1
2018-03-08	1	0	0	432	2018	3	Spring	8	0	0	2.19	2.96	0.01	48	16	0.9	91	1
2018-03-09	0	0	0	433	2018	3	Spring	9	0	0	3.54	3.09	0	52	17	0.9	114	3
2018-03-10	0	1	0	434	2018	3	Spring	10	1	0	9.3	2.67	0	56	17	0.9	119	1
2018-03-11	0	0	0	435	2018	3	Spring	11	1	0	11.97	2.6	0	57	31	1.1	132	1
2018-03-12	0	0	0	436	2018	3	Spring	12	0	0	13.72	3.73	0	48	28	1.1	144	0
2018-03-13	0	0	0	437	2018	3	Spring	13	0	0	16.89	4.09	0	33	19	0.8	148	0
2018-03-14	0	1	0	438	2018	3	Spring	14	0	0	16.89	2.94	0.01	51	26	1	135	1
2018-03-15	0	0	0	439	2018	3	Spring	15	0	0	9.91	5.05	0.13	43	15	0.8	74	1
2018-03-16	0	0	0	440	2018	3	Spring	16	0	0	4.62	3.28	0	18	15	0.6	94	0
2018-03-17	0	0	1	441	2018	3	Spring	17	1	0	5.9	2.49	2.58	40	22	0.7	74	3
2018-03-18	0	0	0	442	2018	3	Spring	18	1	0	7.67	2.84	4.25	75	12	1.4	47	2
2018-03-19	0	0	0	443	2018	3	Spring	19	0	0	7.45	3.93	0.17	53	16	1	117	1
2018-03-20	1	0	0	444	2018	3	Spring	20	0	0	3.42	3.84	0.12	20	15	0.6	78	0
2018-03-21	1	0	0	445	2018	3	Spring	21	0	0	5.45	1.45	0	33	22	0.9	84	4
2018-03-22	0	0	0	446	2018	3	Spring	22	0	0	7.55	1.66	0	47	19	0.9	103	1
2018-03-23	0	0	0	447	2018	3	Spring	23	0	0	12.51	2.51	0.05	54	17	0.9	140	0
2018-03-24	0	0	0	448	2018	3	Spring	24	1	0	15.54	1.48	1.8	33	13	0.7	145	3
2018-03-25	0	0	0	449	2018	3	Spring	25	1	0	15.11	1.76	0	56	26	1	177	1
2018-03-26	0	0	0	450	2018	3	Spring	26	0	0	17.1	3.01	0	52	20	0.9	143	1
2018-03-27	0	0	0	451	2018	3	Spring	27	0	0	19.84	4.47	0	35	17	0.7	132	1
2018-03-28	0	0	0	452	2018	3	Spring	28	0	0	21.48	3.8	0	34	20	0.8	136	4
2018-03-29	0	0	0	453	2018	3	Spring	29	0	0	19.2	3.05	0	64	18	1.1	112	4
2018-03-30	0	0	0	454	2018	3	Spring	30	0	0	15.69	2.02	0	32	18	0.8	139	3
2018-03-31	0	0	0	455	2018	3	Spring	31	1	0	16.99	2.52	0	57	21	0.9	126	7
2018-04-01	0	0	0	456	2018	4	Spring	1	1	0	19.08	1.95	0	72	29	1.6	164	11
2018-04-02	0	0	1	457	2018	4	Spring	2	0	0	21.96	3.1	0.02	57	24	1.1	155	2
2018-04-03	0	0	0	458	2018	4	Spring	3	0	0	18.14	4.02	0.6	50	30	1.1	94	4
2018-04-04	0	0	0	459	2018	4	Spring	4	0	0	9.57	3.92	0.14	23	15	0.5	61	0
2018-04-05	0	0	0	460	2018	4	Spring	5	0	0	6.63	2.54	1.2	42	12	0.6	40	5
2018-04-06	0	0	0	461	2018	4	Spring	6	0	0	7.4	5.7	0	31	12	0.5	94	10
2018-04-07	0	0	0	462	2018	4	Spring	7	1	0	7.72	3.71	0	20	15	0.4	106	10
2018-04-08	0	0	0	463	2018	4	Spring	8	1	0	13.41	3.58	0	37	20	0.6	108	12
2018-04-09	0	1	0	464	2018	4	Spring	9	0	0	17.8	5.17	0	44	33	0.7	135	8
2018-04-10	0	0	0	465	2018	4	Spring	10	0	0	18.44	3.25	0	57	25	0.9	110	8
2018-04-11	0	0	0	466	2018	4	Spring	11	0	0	18.02	2.91	0	48	31	0.7	106	5
2018-04-12	0	1	0	467	2018	4	Spring	12	0	0	14.65	3.19	3.88	29	17	0.6	81	4
2018-04-13	0	0	0	468	2018	4	Spring	13	0	0	13.04	4.18	3.97	22	12	0.7	67	5
2018-04-14	0	0	0	469	2018	4	Spring	14	1	0	11.38	3.55	0.17	30	14	0.6	83	6
2018-04-15	0	0	0	470	2018	4	Spring	15	1	0	12.98	1.66	0	42	20	0.6	107	10
2018-04-16	0	0	0	471	2018	4	Spring	16	0	0	15.14	1.97	0	47	21	0.6	138	11
2018-04-17	0	0	0	472	2018	4	Spring	17	0	0	16.01	3.02	0	45	22	0.6	153	13
2018-04-18	0	0	0	473	2018	4	Spring	18	0	0	19.89	3.67	0	49	24	0.7	163	10
2018-04-19	0	0	0	474	2018	4	Spring	19	0	0	23	3.73	0	47	24	0.7	188	17
2018-04-20	0	0	0	475	2018	4	Spring	20	0	0	23.12	4.29	0	52	29	0.8	210	17
2018-04-21	0	0	0	476	2018	4	Spring	21	1	0	23.19	2.92	14.44	48	25	0.7	167	8
2018-04-22	0	0	0	477	2018	4	Spring	22	1	0	17.38	3.64	25.2	21	11	0.6	46	9
2018-04-23	0	0	0	478	2018	4	Spring	23	0	0	14.45	4.64	0.82	25	11	0.5	90	21
2018-04-24	0	0	0	479	2018	4	Spring	24	0	0	15.87	3.23	0	28	19	0.6	136	15
2018-04-25	0	0	0	480	2018	4	Spring	25	0	0	17.57	1.09	0	31	26	0.6	173	17
2018-04-26	0	0	0	481	2018	4	Spring	26	0	0	19.48	2.48	0.01	36	14	0.8	132	8
2018-04-27	0	0	0	482	2018	4	Spring	27	0	0	22.15	1.22	0	46	23	0.9	199	26
2018-04-28	0	0	0	483	2018	4	Spring	28	1	0	23.13	3.35	0	38	21	0.7	166	16
2018-04-29	0	0	0	484	2018	4	Spring	29	1	0	23.61	3.16	0	48	24	0.8	157	26
2018-04-30	0	0	0	485	2018	4	Spring	30	0	0	25.07	2.2	4.79	59	27	0.9	171	22
2018-05-01	0	0	0	486	2018	5	Spring	1	0	0	22.58	1.53	10.38	53	17	0.9	100	27
2018-05-02	0	0	0	487	2018	5	Spring	2	0	0	17.46	3.81	0.02	28	15	0.5	120	21
2018-05-03	0	0	0	488	2018	5	Spring	3	0	0	17.99	2.95	0	34	20	0.5	123	26
2018-05-04	0	0	0	489	2018	5	Spring	4	0	0	20.93	4.6	0	42	24	0.5	153	38
2018-05-05	0	1	0	490	2018	5	Spring	5	1	0	19.94	2.28	6.61	52	10	0.6	96	42
2018-05-06	0	0	0	491	2018	5	Spring	6	1	0	17.96	2.58	2.91	38	13	0.8	118	35
2018-05-07	0	0	0	492	2018	5	Spring	7	0	0	21.15	1.49	0	44	22	0.7	157	43
2018-05-08	0	0	0	493	2018	5	Spring	8	0	0	21.55	2.42	0	40	25	0.7	171	34
2018-05-09	0	0	0	494	2018	5	Spring	9	0	0	20.13	2.12	0	47	30	0.7	211	33
2018-05-10	0	1	0	495	2018	5	Spring	10	0	0	19.41	3.23	0	34	27	0.5	172	37
2018-05-11	0	0	1	496	2018	5	Spring	11	0	0	18.4	1.98	0.64	36	20	0.5	124	36
2018-05-12	0	0	0	497	2018	5	Spring	12	1	0	20.56	2.05	0	38	17	0.7	146	40
2018-05-13	0	1	0	498	2018	5	Spring	13	1	0	25.45	3.52	0	30	15	0.7	157	41
2018-05-14	0	0	0	499	2018	5	Spring	14	0	0	26.43	4.19	0	30	18	0.6	170	46
2018-05-15	0	0	0	500	2018	5	Spring	15	0	0	27.36	3.33	23.9	33	20	0.7	122	55
2018-05-16	0	0	0	501	2018	5	Spring	16	0	0	25.35	3.55	9.92	30	18	0.7	123	61
2018-05-17	0	0	0	502	2018	5	Spring	17	0	0	25.62	3.07	0.1	36	20	0.8	104	73
2018-05-18	0	0	0	503	2018	5	Spring	18	0	0	22.98	2.73	0	22	22	0.8	158	70
2018-05-19	0	0	0	504	2018	5	Spring	19	1	0	21.99	3.22	1.96	22	16	0.6	154	87
2018-05-20	0	0	0	505	2018	5	Spring	20	1	0	19.18	3.23	7.69	18	11	0.5	113	83
2018-05-21	0	0	0	506	2018	5	Spring	21	0	0	18.27	1.88	6.53	23	18	0.6	78	75
2018-05-22	0	0	0	507	2018	5	Spring	22	0	0	19.3	2.94	10.05	25	12	0.6	104	113
2018-05-23	0	0	0	508	2018	5	Spring	23	0	0	21.25	3.35	0	45	15	0.6	160	78
2018-05-24	0	0	0	509	2018	5	Spring	24	0	0	21.62	3.66	0.51	34	15	0.5	135	76
2018-05-25	0	0	0	510	2018	5	Spring	25	0	0	21.75	1.78	1.18	58	21	1.1	130	80
2018-05-26	0	0	1	511	2018	5	Spring	26	1	0	23.08	0.91	0	57	9	1	200	109
2018-05-27	0	0	0	512	2018	5	Spring	27	1	0	25.58	1.13	0	54	9	0.9	165	94
2018-05-28	0	0	0	513	2018	5	Spring	28	0	0	27.15	2.17	0	52	14	0.8	180	122
2018-05-29	0	0	0	514	2018	5	Spring	29	0	0	25.33	1.23	0	49	20	0.7	201	100
2018-05-30	0	0	0	515	2018	5	Spring	30	0	0	25.11	1.55	0	44	17	0.8	203	100
2018-05-31	0	0	0	516	2018	5	Spring	31	0	0	26.24	1.48	0	36	19	0.6	217	97
2018-06-01	0	0	0	517	2018	6	Summer	1	0	0	27.01	1.75	0	29	19	0.6	175	146
2018-06-02	0	0	0	518	2018	6	Summer	2	1	0	25.81	3.22	0	33	20	0.6	188	108
2018-06-03	0	0	0	519	2018	6	Summer	3	1	0	25.84	2.32	0	39	13	0.6	237	112
2018-06-04	0	1	0	520	2018	6	Summer	4	0	0	27.3	2.04	1.38	47	17	0.7	198	92
2018-06-05	0	0	0	521	2018	6	Summer	5	0	0	29.15	3.86	0	40	12	0.6	204	135
2018-06-06	0	0	0	522	2018	6	Summer	6	0	0	29.06	3.98	0	45	8	0.6	201	108
2018-06-07	0	0	0	523	2018	6	Summer	7	0	0	29.08	2.06	0	38	13	0.6	223	121
2018-06-08	0	0	0	524	2018	6	Summer	8	0	0	29.09	2.02	2.31	53	15	0.8	218	94
2018-06-09	0	0	0	525	2018	6	Summer	9	1	0	22.77	2.19	11.9	37	5	0.8	117	102
2018-06-10	0	0	0	526	2018	6	Summer	10	1	0	21.9	2.47	1.47	18	5	0.6	124	92
2018-06-11	0	0	0	527	2018	6	Summer	11	0	0	25.68	1.09	0	29	11	0.9	230	104
2018-06-12	0	0	0	528	2018	6	Summer	12	0	0	29.17	2.66	0.18	33	17	0.7	218	122
2018-06-13	0	0	0	529	2018	6	Summer	13	0	0	29.25	3.05	1.74	22	8	0.6	168	92
2018-06-14	0	0	0	530	2018	6	Summer	14	0	0	26.65	2.54	0.03	27	12	0.6	174	86
2018-06-15	0	0	0	531	2018	6	Summer	15	0	0	27.59	2.5	0	37	15	0.7	218	94
2018-06-16	0	1	0	532	2018	6	Summer	16	1	0	27.41	2.79	0	29	10	0.5	146	85
2018-06-17	0	0	0	533	2018	6	Summer	17	1	0	27.29	3.06	0	33	13	0.5	189	78
2018-06-18	0	0	0	534	2018	6	Summer	18	0	0	26.62	2.56	0.81	32	10	0.6	169	75
2018-06-19	0	0	0	535	2018	6	Summer	19	0	0	27.8	1.54	1.41	39	7	0.6	187	81
2018-06-20	0	0	0	536	2018	6	Summer	20	0	0	28.3	1.98	0.01	35	10	0.6	193	69
2018-06-21	0	0	0	537	2018	6	Summer	21	0	0	28.34	1.98	0	38	10	0.6	170	72
2018-06-22	0	0	0	538	2018	6	Summer	22	0	0	28	2.78	0	20	16	0.4	158	76
2018-06-23	0	0	0	539	2018	6	Summer	23	1	0	27.66	3.02	0	19	11	0.5	194	64
2018-06-24	0	0	0	540	2018	6	Summer	24	1	0	29.06	2.74	0	27	10	0.6	205	56
2018-06-25	0	0	0	541	2018	6	Summer	25	0	0	27.36	4.12	37.57	35	9	0.8	105	67
2018-06-26	0	0	0	542	2018	6	Summer	26	0	0	25.66	1.99	33.83	16	6	0.7	89	58
2018-06-27	0	0	0	543	2018	6	Summer	27	0	0	29.64	1.84	0.25	24	7	0.8	134	51
2018-06-28	0	0	0	544	2018	6	Summer	28	0	0	29.74	2.37	0.74	22	9	0.7	155	46
2018-06-29	0	0	0	545	2018	6	Summer	29	0	0	28.55	1.64	0	28	20	0.8	207	71
2018-06-30	1	0	0	546	2018	6	Summer	30	1	0	27.3	1.6	0	36	18	0.8	199	71
2018-07-01	0	0	0	547	2018	7	Summer	1	1	0	28.36	2.01	0	28	12	0.7	164	83
2018-07-02	0	0	0	548	2018	7	Summer	2	0	0	27.61	2.3	0	22	17	0.8	144	51
2018-07-03	0	0	0	549	2018	7	Summer	3	0	0	28.77	1.38	0	31	16	0.7	186	58
2018-07-04	0	0	0	550	2018	7	Summer	4	0	0	28.1	1.24	3.1	34	13	0.7	126	64
2018-07-05	0	1	0	551	2018	7	Summer	5	0	0	29.17	2.77	0.13	37	15	0.7	199	43
2018-07-06	0	0	0	552	2018	7	Summer	6	0	0	28.56	3.34	0.01	21	9	0.5	131	56
2018-07-07	0	0	0	553	2018	7	Summer	7	1	0	28.55	2.95	0	19	11	0.6	129	66
2018-07-08	0	0	0	554	2018	7	Summer	8	1	0	27.63	2.48	1.74	17	9	0.5	64	59
2018-07-09	0	0	0	555	2018	7	Summer	9	0	0	25.58	2.73	7.44	12	7	0.5	63	42
2018-07-10	0	0	0	556	2018	7	Summer	10	0	0	26.31	2.19	4.27	19	15	0.6	91	48
2018-07-11	0	0	0	557	2018	7	Summer	11	0	0	29.81	3.39	0.56	36	8	0.8	144	50
2018-07-12	0	0	0	558	2018	7	Summer	12	0	0	31.14	3.31	0.3	20	8	0.6	107	57
2018-07-13	0	0	0	559	2018	7	Summer	13	0	0	32.05	3.38	1.1	23	11	0.6	133	52
2018-07-14	0	1	0	560	2018	7	Summer	14	1	0	32	2.98	9.67	22	8	0.7	128	32
2018-07-15	0	0	0	561	2018	7	Summer	15	1	0	32.53	2.63	6.16	21	9	0.6	148	57
2018-07-16	0	0	0	562	2018	7	Summer	16	0	0	32.52	3.42	0.04	33	9	0.8	177	58
2018-07-17	0	0	0	563	2018	7	Summer	17	0	0	30.68	3.46	0.01	27	13	0.7	173	55
2018-07-18	0	0	0	564	2018	7	Summer	18	0	0	32.58	3.17	0	25	14	0.7	147	59
2018-07-19	0	0	0	565	2018	7	Summer	19	0	0	32.31	3.17	0	25	16	0.7	188	46
2018-07-20	0	0	0	566	2018	7	Summer	20	0	0	32.76	3.32	0	29	16	0.7	173	55
2018-07-21	0	0	0	567	2018	7	Summer	21	1	0	32.06	3.06	0	36	15	0.7	200	38
2018-07-22	0	0	0	568	2018	7	Summer	22	1	0	31.65	2.59	0.47	28	15	0.6	124	38
2018-07-23	0	0	0	569	2018	7	Summer	23	0	0	29.19	4.68	11.76	17	12	0.6	87	38
2018-07-24	0	0	0	570	2018	7	Summer	24	0	0	31.58	2.15	1.1	18	10	0.5	143	38
2018-07-25	0	0	0	571	2018	7	Summer	25	0	0	33.84	2.52	1.97	25	10	0.7	159	35
2018-07-26	0	0	0	572	2018	7	Summer	26	0	0	30.86	1.75	8	27	12	0.8	128	34
2018-07-27	0	0	0	573	2018	7	Summer	27	0	0	28.5	1.6	16	21	12	0.7	125	44
2018-07-28	0	0	0	574	2018	7	Summer	28	1	0	28.8	1.22	14.26	19	9	0.6	86	38
2018-07-29	0	0	0	575	2018	7	Summer	29	1	0	28.78	2.17	19.25	17	8	0.6	94	40
2018-07-30	0	0	0	576	2018	7	Summer	30	0	0	27.97	1.35	13.63	16	14	0.7	101	46
2018-07-31	0	0	0	577	2018	7	Summer	31	0	0	30.3	1.02	1.7	26	15	0.9	144	43
2018-08-01	0	0	0	578	2018	8	Summer	1	0	0	31.58	1.01	0.41	39	17	0.9	167	45
2018-08-02	0	0	0	579	2018	8	Summer	2	0	0	31.78	1.55	0	41	18	0.9	178	50
2018-08-03	0	0	0	580	2018	8	Summer	3	0	0	31.04	2.18	0.02	29	19	0.8	175	34
2018-08-04	0	0	0	581	2018	8	Summer	4	1	0	30.05	2.6	4.3	19	10	0.6	95	36
2018-08-05	0	0	0	582	2018	8	Summer	5	1	0	30.99	2.3	5.55	28	14	0.7	129	43
2018-08-06	0	0	0	583	2018	8	Summer	6	0	0	31.81	1.73	3.17	38	19	0.9	154	29
2018-08-07	0	0	0	584	2018	8	Summer	7	0	0	31.53	1.65	0.4	43	16	0.9	174	34
2018-08-08	0	0	0	585	2018	8	Summer	8	0	0	32.5	1.54	10.68	42	13	0.9	165	35
2018-08-09	0	0	0	586	2018	8	Summer	9	0	0	31.12	1.37	5.9	57	11	1	138	34
2018-08-10	1	0	0	587	2018	8	Summer	10	0	0	30.01	1.23	2.2	62	15	1.1	189	25
2018-08-11	0	0	0	588	2018	8	Summer	11	1	0	30.59	1.8	0.24	30	15	0.8	176	31
2018-08-12	0	0	0	589	2018	8	Summer	12	1	0	30.28	2.35	0.03	29	18	0.7	163	22
2018-08-13	0	0	0	590	2018	8	Summer	13	0	0	28.4	3.03	20.12	24	7	0.6	46	30
2018-08-14	0	0	0	591	2018	8	Summer	14	0	0	27.89	4.9	47.22	10	5	0.5	92	30
2018-08-15	0	0	0	592	2018	8	Summer	15	0	0	27.2	3.15	5.26	14	9	0.5	103	25
2018-08-16	0	0	0	593	2018	8	Summer	16	0	0	27.12	3.34	4.77	17	7	0.7	97	21
2018-08-17	0	0	0	594	2018	8	Summer	17	0	0	26.28	4.12	0.97	26	7	0.8	123	24
2018-08-18	0	0	0	595	2018	8	Summer	18	1	0	25.62	5.74	59.14	13	4	0.6	29	25
2018-08-19	0	0	0	596	2018	8	Summer	19	1	0	26.52	3.23	107.24	12	5	0.6	50	25
2018-08-20	0	0	1	597	2018	8	Summer	20	0	0	25.98	2.98	1.45	13	6	0.6	80	27
2018-08-21	0	0	0	598	2018	8	Summer	21	0	0	27.51	0.69	0	26	10	0.8	153	21
2018-08-22	0	0	0	599	2018	8	Summer	22	0	0	26.08	1.71	2.65	48	22	1.1	157	26
2018-08-23	0	0	0	600	2018	8	Summer	23	0	0	24.04	2.35	0.08	26	19	0.9	166	36
2018-08-24	0	0	0	601	2018	8	Summer	24	0	0	24.68	1.57	0	34	25	1	172	20
2018-08-25	0	0	0	602	2018	8	Summer	25	1	0	24.94	1.48	0	35	13	0.9	181	14
2018-08-26	0	0	0	603	2018	8	Summer	26	1	0	24.95	1.74	0	28	12	0.8	188	18
2018-08-27	0	0	0	604	2018	8	Summer	27	0	0	24.84	2.34	0.85	20	12	0.7	148	19
2018-08-28	0	0	0	605	2018	8	Summer	28	0	0	28.28	1.09	1.57	22	7	0.7	126	22
2018-08-29	0	0	0	606	2018	8	Summer	29	0	0	28.7	1.7	4.52	28	7	0.8	109	16
2018-08-30	0	0	0	607	2018	8	Summer	30	0	0	27.04	1.95	17.62	27	7	0.9	99	20
2018-08-31	0	0	0	608	2018	8	Summer	31	0	0	25.12	2.73	9.27	31	9	1	89	18
2018-09-01	0	0	0	609	2018	9	Autumn	1	1	0	24.65	1.84	0.04	16	7	0.6	140	30
2018-09-02	0	0	0	610	2018	9	Autumn	2	1	0	24.51	2.13	8.74	24	13	0.7	129	18
2018-09-03	0	0	0	611	2018	9	Autumn	3	0	0	25.8	2.25	8.21	30	10	0.8	161	18
2018-09-04	0	0	0	612	2018	9	Autumn	4	0	0	23.48	1.83	0	21	18	0.6	118	19
2018-09-05	0	0	0	613	2018	9	Autumn	5	0	0	24.35	0.94	0	33	17	0.9	139	16
2018-09-06	0	0	0	614	2018	9	Autumn	6	0	0	22.94	2.88	0.04	26	11	0.7	164	13
2018-09-07	0	0	0	615	2018	9	Autumn	7	0	0	20.69	2.41	0	16	14	0.5	98	19
2018-09-08	0	0	0	616	2018	9	Autumn	8	1	0	21.91	1.01	0	30	14	0.7	137	14
2018-09-09	0	0	0	617	2018	9	Autumn	9	1	0	21.76	1.18	0	31	15	0.6	145	13
2018-09-10	0	0	0	618	2018	9	Autumn	10	0	0	21.06	1.51	0	23	18	0.6	143	17
2018-09-11	0	0	0	619	2018	9	Autumn	11	0	0	21.2	1.68	0	31	22	0.7	164	7
2018-09-12	0	0	0	620	2018	9	Autumn	12	0	0	21.23	1.55	0	34	24	0.6	164	13
2018-09-13	0	1	0	621	2018	9	Autumn	13	0	0	22.74	1.39	1.58	31	16	0.7	120	3
2018-09-14	0	0	0	622	2018	9	Autumn	14	0	0	22.6	1.38	0.14	40	11	0.8	110	6
2018-09-15	0	0	0	623	2018	9	Autumn	15	1	0	21.93	1.29	5.61	55	14	1	102	5
2018-09-16	0	0	0	624	2018	9	Autumn	16	1	0	20.84	1.73	0.76	48	11	1.1	72	10
2018-09-17	0	0	0	625	2018	9	Autumn	17	0	0	21.96	1.38	0.03	37	18	1	127	9
2018-09-18	0	0	0	626	2018	9	Autumn	18	0	0	21.3	1.8	7.03	32	23	0.9	81	5
2018-09-19	0	0	0	627	2018	9	Autumn	19	0	0	21.17	1.93	22.96	22	6	1.2	46	10
2018-09-20	0	0	0	628	2018	9	Autumn	20	0	0	20.69	2.68	1.52	36	11	1.2	97	7
2018-09-21	0	0	0	629	2018	9	Autumn	21	0	0	21.38	1.44	0.02	51	14	1.3	161	5
2018-09-22	0	0	0	630	2018	9	Autumn	22	1	0	19.16	1.95	0	32	21	0.7	105	6
2018-09-23	0	0	0	631	2018	9	Autumn	23	1	0	18.78	1.52	0	31	26	0.7	128	13
2018-09-24	0	0	0	632	2018	9	Autumn	24	0	0	17.64	2.05	0	28	22	0.7	123	7
2018-09-25	0	0	0	633	2018	9	Autumn	25	0	0	16.99	1.86	0.81	36	17	1	53	7
2018-09-26	0	0	0	634	2018	9	Autumn	26	0	0	17.96	1.51	0	38	19	0.9	122	18
2018-09-27	0	0	0	635	2018	9	Autumn	27	0	0	18.33	1.12	0	41	19	0.7	150	13
2018-09-28	0	0	0	636	2018	9	Autumn	28	0	0	19.76	1.53	0	61	13	1	158	9
2018-09-29	0	0	0	637	2018	9	Autumn	29	1	0	20	2.07	0	49	19	0.9	144	11
2018-09-30	0	0	0	638	2018	9	Autumn	30	1	0	16.15	2.69	0	22	16	0.6	86	4
2018-10-01	0	0	0	639	2018	10	Autumn	1	0	0	16.98	2.43	0	16	16	0.5	96	4
2018-10-02	0	0	0	640	2018	10	Autumn	2	0	0	18.53	1.27	0	37	19	0.9	130	9
2018-10-03	0	0	0	641	2018	10	Autumn	3	0	0	18.01	1.12	0	40	20	0.8	146	7
2018-10-04	0	0	0	642	2018	10	Autumn	4	0	0	18.46	1.01	0	50	21	1	159	7
2018-10-05	0	0	0	643	2018	10	Autumn	5	0	0	17.77	1.4	0	59	24	1	187	9
2018-10-06	0	0	0	644	2018	10	Autumn	6	1	0	17.75	2.07	0	68	32	1	189	7
2018-10-07	0	0	0	645	2018	10	Autumn	7	1	0	17.93	1.41	0	43	25	0.9	92	10
2018-10-08	0	0	1	646	2018	10	Autumn	8	0	0	18.61	2.09	0.95	42	21	0.8	99	2
2018-10-09	0	0	0	647	2018	10	Autumn	9	0	0	15.23	3.47	0.98	45	13	0.6	73	2
2018-10-10	0	0	0	648	2018	10	Autumn	10	0	0	11.4	1.23	0	25	16	0.5	86	2
2018-10-11	0	0	0	649	2018	10	Autumn	11	0	0	12.15	1.24	0	34	17	0.6	86	7
2018-10-12	1	0	0	650	2018	10	Autumn	12	0	0	12.76	1.82	0	51	26	0.8	131	0
2018-10-13	0	0	0	651	2018	10	Autumn	13	1	0	13.83	1.84	0	45	27	0.7	143	3
2018-10-14	0	0	0	652	2018	10	Autumn	14	1	0	14.55	1.82	0	37	26	0.6	120	3
2018-10-15	0	0	0	653	2018	10	Autumn	15	0	0	14.39	1.65	0	43	24	0.9	78	1
2018-10-16	0	0	0	654	2018	10	Autumn	16	0	0	14.71	1.47	0.01	63	18	0.9	103	2
2018-10-17	0	0	0	655	2018	10	Autumn	17	0	0	13.44	2.41	0	53	19	1	94	1
2018-10-18	0	0	0	656	2018	10	Autumn	18	0	0	11.23	2.12	0	30	16	0.6	88	2
2018-10-19	0	0	0	657	2018	10	Autumn	19	0	0	11.45	1.45	0	41	23	1.1	99	3
2018-10-20	0	0	1	658	2018	10	Autumn	20	1	0	12.47	1.74	0	44	22	0.9	67	9
2018-10-21	0	0	0	659	2018	10	Autumn	21	1	0	14.44	1.55	0.04	30	18	0.7	91	3
2018-10-22	0	0	0	660	2018	10	Autumn	22	0	0	15.19	1.83	0.17	50	13	0.7	110	7
2018-10-23	0	0	0	661	2018	10	Autumn	23	0	0	13.52	1.49	0	35	15	0.5	83	2
2018-10-24	0	0	0	662	2018	10	Autumn	24	0	0	14.38	2.1	0	75	30	0.9	153	9
2018-10-25	0	0	0	663	2018	10	Autumn	25	0	0	16.14	2.7	0.54	87	22	1.1	87	1
2018-10-26	0	0	1	664	2018	10	Autumn	26	0	0	10.44	3.52	0	35	17	0.5	61	1
2018-10-27	0	0	0	665	2018	10	Autumn	27	1	0	11.42	1.48	0	31	24	0.6	72	3
2018-10-28	0	0	0	666	2018	10	Autumn	28	1	0	12.9	2.34	0	35	22	0.8	74	3
2018-10-29	0	0	0	667	2018	10	Autumn	29	0	0	12.25	2.41	0	41	27	0.8	64	5
2018-10-30	0	0	0	668	2018	10	Autumn	30	0	0	10.8	1.64	0	38	21	0.8	80	2
2018-10-31	0	0	0	669	2018	10	Autumn	31	0	0	11.17	1.89	0	39	25	0.8	92	3
2018-11-01	0	1	0	670	2018	11	Autumn	1	0	0	11.76	1.33	0	48	27	1	106	7
2018-11-02	0	0	0	671	2018	11	Autumn	2	0	0	11.21	1.91	0	56	28	0.9	129	4
2018-11-03	0	0	0	672	2018	11	Autumn	3	1	0	11.37	2.33	0	40	21	0.7	100	4
2018-11-04	0	0	0	673	2018	11	Autumn	4	1	0	13.47	1.31	0.14	44	19	0.9	82	1
2018-11-05	0	0	0	674	2018	11	Autumn	5	0	0	11.43	3.62	8.29	45	11	0.8	19	3
2018-11-06	0	0	0	675	2018	11	Autumn	6	0	0	7.53	3.26	9.15	24	7	0.6	42	4
2018-11-07	0	0	0	676	2018	11	Autumn	7	0	0	8.44	1.48	5.14	28	15	0.8	33	6
2018-11-08	0	0	0	677	2018	11	Autumn	8	0	0	5.36	1.55	8.15	28	7	0.7	39	6
2018-11-09	0	0	0	678	2018	11	Autumn	9	0	0	8.97	2.49	0.06	34	10	0.8	75	5
2018-11-10	0	0	0	679	2018	11	Autumn	10	1	0	10.79	1.92	0.01	45	14	1.1	85	6
2018-11-11	0	0	0	680	2018	11	Autumn	11	1	0	10.47	1.23	1.63	63	13	1.3	40	5
2018-11-12	0	0	0	681	2018	11	Autumn	12	0	0	10.09	0.85	0	79	18	1.7	52	0
2018-11-13	0	0	0	682	2018	11	Autumn	13	0	0	9.84	1.3	0	71	15	1.6	96	2
2018-11-14	0	0	0	683	2018	11	Autumn	14	0	0	10.89	1.85	0.05	48	23	1	106	2
2018-11-15	0	0	0	684	2018	11	Autumn	15	0	0	10.73	1.9	2.08	47	17	1	51	5
2018-11-16	0	0	0	685	2018	11	Autumn	16	0	0	8.26	3.47	0.1	27	9	0.7	47	3
2018-11-17	0	0	0	686	2018	11	Autumn	17	1	0	5.75	0.99	0.45	32	13	0.7	49	7
2018-11-18	0	0	0	687	2018	11	Autumn	18	1	0	6.11	1.28	0.08	55	14	1.1	27	3
2018-11-19	0	0	0	688	2018	11	Autumn	19	0	0	5.48	2.34	0	58	11	1.1	56	8
2018-11-20	0	0	0	689	2018	11	Autumn	20	0	0	6.8	1.88	0.06	62	11	1.2	57	4
2018-11-21	0	0	0	690	2018	11	Autumn	21	0	0	6.81	2.12	0.26	73	14	1.1	52	6
2018-11-22	0	1	0	691	2018	11	Autumn	22	0	0	4.4	1.88	0	53	15	1	66	7
2018-11-23	0	0	0	692	2018	11	Autumn	23	0	0	6.25	3.27	0	63	16	1	85	1
2018-11-24	1	0	0	693	2018	11	Autumn	24	1	0	6.7	1.47	0	85	18	1.4	50	3
2018-11-25	0	0	0	694	2018	11	Autumn	25	1	0	7.84	2.12	0	110	29	1.4	90	4
2018-11-26	0	0	0	695	2018	11	Autumn	26	0	0	8.15	2.55	0	105	17	1.4	76	5
2018-11-27	0	0	0	696	2018	11	Autumn	27	0	0	7.46	2.2	0	101	22	1.7	41	2
2018-11-28	0	0	0	697	2018	11	Autumn	28	0	0	8.84	2	0	90	17	1.7	74	4
2018-11-29	0	0	0	698	2018	11	Autumn	29	0	0	9.12	1.52	0	96	20	2	17	3
2018-11-30	0	0	0	699	2018	11	Autumn	30	0	0	8.95	1.53	0.29	85	15	1.4	58	1
2018-12-01	0	0	0	700	2018	12	Winter	1	1	0	9.98	2.05	1.28	88	16	1.2	33	5
2018-12-02	0	0	0	701	2018	12	Winter	2	1	0	11.19	1.48	6.99	64	9	1.3	25	2
2018-12-03	0	0	0	702	2018	12	Winter	3	0	0	9.15	3.15	3.89	84	8	2.1	13	5
2018-12-04	0	0	0	703	2018	12	Winter	4	0	0	4.23	2.78	0.12	47	13	0.7	40	6
2018-12-05	0	0	0	704	2018	12	Winter	5	0	0	1.33	2.77	6.84	31	9	0.6	31	9
2018-12-06	0	0	0	705	2018	12	Winter	6	0	0	-0.45	3.28	0.08	42	7	0.6	35	2
2018-12-07	0	0	0	706	2018	12	Winter	7	0	0	-3.88	1.94	0	23	12	0.5	47	3
2018-12-08	0	0	0	707	2018	12	Winter	8	1	0	-3.85	1.88	0	29	15	0.6	45	2
2018-12-09	0	0	0	708	2018	12	Winter	9	1	0	-2.6	1.45	0	49	23	0.9	35	5
2018-12-10	0	0	0	709	2018	12	Winter	10	0	0	-1.04	1.16	1.13	83	27	1.2	14	6
2018-12-11	0	0	0	710	2018	12	Winter	11	0	0	-1.74	3.06	0.39	80	18	1.1	40	6
2018-12-12	0	0	0	711	2018	12	Winter	12	0	0	-3.66	1.37	0	62	21	1	43	6
2018-12-13	0	0	0	712	2018	12	Winter	13	0	0	-1.66	1.59	0	94	22	1.3	38	6
2018-12-14	0	0	0	713	2018	12	Winter	14	0	0	-0.31	1.59	0	67	27	1.2	43	3
2018-12-15	0	0	0	714	2018	12	Winter	15	1	0	0.35	2.02	0	48	23	1	39	7
2018-12-16	0	0	0	715	2018	12	Winter	16	1	0	1.71	1.45	0	126	15	1.7	18	4
2018-12-17	0	0	0	716	2018	12	Winter	17	0	0	2.48	1.37	0	146	22	1.9	35	7
2018-12-18	0	0	0	717	2018	12	Winter	18	0	0	1.98	1.66	0	82	21	1.2	51	3
2018-12-19	0	0	0	718	2018	12	Winter	19	0	0	3.46	1.59	0	129	25	1.9	49	8
2018-12-20	0	0	0	719	2018	12	Winter	20	0	0	4.98	2.7	0	100	18	1.6	52	5
2018-12-21	0	0	0	720	2018	12	Winter	21	0	0	6.03	1.66	0.09	123	17	1.9	8	0
2018-12-22	0	0	1	721	2018	12	Winter	22	1	0	4.48	1.83	0.02	156	26	2.4	7	3
2018-12-23	0	0	0	722	2018	12	Winter	23	1	0	-0.02	3.07	0	49	25	1	49	9
2018-12-24	0	0	0	723	2018	12	Winter	24	0	0	-0.1	1.77	0	50	28	1.1	32	3
2018-12-25	0	0	0	724	2018	12	Winter	25	0	0	3.38	2.29	0.01	83	24	1.4	42	3
2018-12-26	0	0	0	725	2018	12	Winter	26	0	0	-0.41	3.07	0	49	16	1	43	6
2018-12-27	0	0	0	726	2018	12	Winter	27	0	0	-3.2	3.93	0	30	11	0.6	42	4
2018-12-28	0	0	0	727	2018	12	Winter	28	0	0	-6.77	4.09	0	23	15	0.4	51	4
2018-12-29	0	0	0	728	2018	12	Winter	29	1	0	-6.21	1.52	0	36	26	0.7	51	8
2018-12-30	0	0	0	729	2018	12	Winter	30	1	0	-5.31	1.58	0	56	26	0.9	48	3
2018-12-31	0	0	0	730	2018	12	Winter	31	0	0	-3.11	0.89	0	82	35	1.2	39	1
2019-01-01	0	0	0	731	2019	1	Winter	1	0	0	-1.17	0.71	0	114	35	1.4	40	3
2019-01-02	0	0	0	732	2019	1	Winter	2	0	0	-1.5	1.27	0	151	37	1.7	43	4
2019-01-03	0	0	0	733	2019	1	Winter	3	0	0	-1.51	1.76	0.03	149	44	1.7	75	5
2019-01-04	0	0	0	734	2019	1	Winter	4	0	0	0.62	1.55	1.96	151	23	1.9	46	5
2019-01-05	0	0	0	735	2019	1	Winter	5	1	0	-0.64	1.58	0.33	85	26	1.7	28	5
2019-01-06	0	0	0	736	2019	1	Winter	6	1	0	-0.27	0.8	0	96	23	1.7	53	1
2019-01-07	0	0	0	737	2019	1	Winter	7	0	0	0.74	0.89	0	164	24	1.9	54	4
2019-01-08	0	0	0	738	2019	1	Winter	8	0	0	-0.22	2.45	0	123	23	1.7	39	1
2019-01-09	0	0	0	739	2019	1	Winter	9	0	0	-1.63	1.37	1.42	35	17	0.9	35	1
2019-01-10	0	1	0	740	2019	1	Winter	10	0	0	-1.23	1.12	0.12	75	9	1.2	37	2
2019-01-11	0	0	0	741	2019	1	Winter	11	0	0	0.17	1.28	0.09	79	10	1	31	5
2019-01-12	0	0	0	742	2019	1	Winter	12	1	0	0.11	1.28	0	128	11	1.5	58	0
2019-01-13	0	0	0	743	2019	1	Winter	13	1	0	0.37	0.88	0	125	7	1.5	35	6
2019-01-14	0	0	0	744	2019	1	Winter	14	0	0	1.1	1.14	0	164	13	2.3	36	3
2019-01-15	0	0	0	745	2019	1	Winter	15	0	0	-3.09	4.8	0	69	9	1	61	0
2019-01-16	0	0	0	746	2019	1	Winter	16	0	0	-3.94	1.38	0	31	18	0.7	44	3
2019-01-17	0	0	0	747	2019	1	Winter	17	0	0	-1.32	1.58	0	74	21	1	42	0
2019-01-18	0	0	0	748	2019	1	Winter	18	0	0	-0.42	2.24	0	96	33	1.5	51	1
2019-01-19	0	0	0	749	2019	1	Winter	19	1	0	1.37	2.02	0.02	101	27	1.7	40	2
2019-01-20	0	0	0	750	2019	1	Winter	20	1	0	-0.1	1.95	0	46	19	1	55	6
2019-01-21	0	0	0	751	2019	1	Winter	21	0	0	0.5	1.76	0	67	26	1.2	46	2
2019-01-22	0	0	0	752	2019	1	Winter	22	0	0	1.5	1.86	0	67	26	1.2	37	1
2019-01-23	0	0	0	753	2019	1	Winter	23	0	0	3.97	1.4	0	80	31	1.7	45	1
2019-01-24	0	0	0	754	2019	1	Winter	24	0	0	2.77	2.23	0	109	36	1.4	104	1
2019-01-25	0	0	0	755	2019	1	Winter	25	0	0	0.83	3.31	0	76	23	1.2	74	4
2019-01-26	0	0	0	756	2019	1	Winter	26	1	0	-0.21	0.98	0	42	19	1	70	0
2019-01-27	0	0	0	757	2019	1	Winter	27	1	0	1.57	2.3	0.01	51	19	0.9	77	0
2019-01-28	0	0	0	758	2019	1	Winter	28	0	0	1.76	1.65	0	70	26	1.2	58	2
2019-01-29	0	0	0	759	2019	1	Winter	29	0	0	0.98	2.27	0	85	28	1.4	67	3
2019-01-30	0	0	0	760	2019	1	Winter	30	0	1	1.29	2.16	4.29	70	23	1.5	58	1
2019-01-31	0	0	0	761	2019	1	Winter	31	0	1	-0.01	2.38	0.75	28	13	0.8	71	0
2019-02-01	0	0	0	762	2019	2	Winter	1	0	1	-0.44	2.38	0.15	60	10	1	95	1
2019-02-02	0	0	0	763	2019	2	Winter	2	1	1	1.48	3.18	0	76	15	1.5	52	2
2019-02-03	0	0	0	764	2019	2	Winter	3	1	1	1.15	2.36	0	90	17	1.6	58	1
2019-02-04	0	0	0	765	2019	2	Winter	4	0	1	2.49	3.46	0	108	18	1.3	105	0
2019-02-05	0	0	0	766	2019	2	Winter	5	0	1	4.15	2.74	0	142	27	1.4	101	2
2019-02-06	0	0	0	767	2019	2	Winter	6	0	1	2.03	2.12	0	146	13	1.5	62	0
2019-02-07	0	0	0	768	2019	2	Winter	7	0	1	-1.49	4.55	0	41	11	0.7	83	2
2019-02-08	0	0	0	769	2019	2	Winter	8	0	1	-2.42	1.38	0.17	47	15	0.8	47	1
2019-02-09	0	0	0	770	2019	2	Winter	9	1	1	-2.24	2.16	0	56	14	1	79	2
2019-02-10	0	0	0	771	2019	2	Winter	10	1	1	-1.58	1.5	1.01	64	13	1.1	58	2
2019-02-11	0	0	0	772	2019	2	Winter	11	0	1	-0.91	2.07	0	70	9	1	85	1
2019-02-12	0	0	0	773	2019	2	Winter	12	0	1	1.01	1.52	0	72	18	1.1	73	1
2019-02-13	0	0	0	774	2019	2	Winter	13	0	1	0.69	1.93	0.86	113	19	1.6	39	2
2019-02-14	0	0	0	775	2019	2	Winter	14	0	1	0.22	2.49	2.55	65	8	1.2	31	0
2019-02-15	0	0	0	776	2019	2	Winter	15	0	1	-0.31	2.48	0.38	83	9	1.3	77	0
2019-02-16	0	0	0	777	2019	2	Winter	16	1	1	-1.41	2.58	0	66	17	1	80	0
2019-02-17	0	0	0	778	2019	2	Winter	17	1	1	0.35	1.23	0	32	16	0.8	69	2
2019-02-18	0	0	0	779	2019	2	Winter	18	0	1	0.79	1.77	1.39	52	28	1.1	63	1
2019-02-19	0	0	0	780	2019	2	Winter	19	0	1	0.7	1.3	0.02	86	18	1.1	74	1
2019-02-20	0	0	0	781	2019	2	Winter	20	0	0	2.82	1.28	0	124	18	1.3	109	1
2019-02-21	0	0	0	782	2019	2	Winter	21	0	0	4.07	1.12	0	131	17	1.8	71	0
2019-02-22	0	0	0	783	2019	2	Winter	22	0	0	4.99	1.25	0	122	26	1.7	119	0
2019-02-23	0	0	0	784	2019	2	Winter	23	1	0	5.93	1.26	0	96	30	1.5	127	0
2019-02-24	0	0	0	785	2019	2	Winter	24	1	0	6.44	1.09	0	113	27	1.8	151	0
2019-02-25	0	0	0	786	2019	2	Winter	25	0	0	8.19	1.12	0	112	29	1.8	149	0
2019-02-26	0	0	0	787	2019	2	Winter	26	0	0	4.64	2.06	0.16	56	25	1.2	88	3
2019-02-27	0	0	0	788	2019	2	Winter	27	0	0	5.91	0.83	0.01	41	14	0.9	103	1
2019-02-28	0	0	0	789	2019	2	Winter	28	0	0	6.42	1.24	0	59	15	1.1	130	1
2019-03-01	0	0	0	790	2019	3	Spring	1	0	0	7.55	1.34	0	90	20	1.4	139	0
2019-03-02	0	0	0	791	2019	3	Spring	2	1	0	6.91	1.27	0	79	19	1.2	143	1
2019-03-03	0	0	0	792	2019	3	Spring	3	1	0	5.19	1.57	0	55	10	0.9	120	0
2019-03-04	0	0	0	793	2019	3	Spring	4	0	0	7.33	2.13	0	56	12	1	120	0
2019-03-05	0	0	0	794	2019	3	Spring	5	0	0	9.5	1.73	0	71	26	1.3	160	0
2019-03-06	0	1	0	795	2019	3	Spring	6	0	0	7.42	3.81	0	39	13	0.8	100	3
2019-03-07	0	0	0	796	2019	3	Spring	7	0	0	5.05	1.27	0	28	16	0.8	95	3
2019-03-08	0	0	0	797	2019	3	Spring	8	0	0	6.65	2.52	0	37	22	0.9	114	4
2019-03-09	0	0	0	798	2019	3	Spring	9	1	0	8.38	1.54	0	45	20	0.9	119	3
2019-03-10	0	0	0	799	2019	3	Spring	10	1	0	10.52	1.54	0.19	73	24	1.3	136	2
2019-03-11	0	0	0	800	2019	3	Spring	11	0	0	9.33	3.1	0	48	13	0.9	103	2
2019-03-12	0	0	0	801	2019	3	Spring	12	0	0	6.39	3.43	0	22	12	0.6	91	3
2019-03-13	0	0	0	802	2019	3	Spring	13	0	0	7.01	1.7	0	27	21	0.8	91	0
2019-03-14	0	0	0	803	2019	3	Spring	14	0	0	9.14	2.37	0	35	18	0.8	95	0
2019-03-15	0	0	0	804	2019	3	Spring	15	0	0	9.68	2.38	0	28	18	0.6	104	1
2019-03-16	0	0	0	805	2019	3	Spring	16	1	0	12.02	3.4	0	43	16	0.7	119	3
2019-03-17	0	0	0	806	2019	3	Spring	17	1	0	12.82	3.34	0	60	26	0.9	123	2
2019-03-18	0	0	0	807	2019	3	Spring	18	0	0	14.52	4.45	0	69	22	0.7	151	3
2019-03-19	0	0	0	808	2019	3	Spring	19	0	0	15.21	4.34	2.05	72	14	0.7	156	3
2019-03-20	0	0	0	809	2019	3	Spring	20	0	0	14.37	3.16	7.51	102	16	0.9	106	2
2019-03-21	0	0	0	810	2019	3	Spring	21	0	0	9.44	5.02	0	32	10	0.5	87	1
2019-03-22	0	0	0	811	2019	3	Spring	22	0	0	8.07	1.76	0	36	21	0.6	101	4
2019-03-23	0	0	0	812	2019	3	Spring	23	1	0	7.55	2.57	0	37	12	0.4	92	0
2019-03-24	0	0	0	813	2019	3	Spring	24	1	0	9.55	3.12	0	65	22	0.6	142	0
2019-03-25	0	0	0	814	2019	3	Spring	25	0	0	12.67	2.38	0	76	15	0.6	122	8
2019-03-26	0	0	0	815	2019	3	Spring	26	0	0	14.58	3.44	0	56	13	0.6	134	6
2019-03-27	0	0	0	816	2019	3	Spring	27	0	0	16.98	2.55	0	67	17	0.7	143	2
2019-03-28	0	0	0	817	2019	3	Spring	28	0	0	12.15	3.27	0.09	68	23	0.9	123	4
2019-03-29	0	0	0	818	2019	3	Spring	29	0	0	10.97	2.24	0.51	82	18	0.9	49	1
2019-03-30	0	0	0	819	2019	3	Spring	30	1	0	7.88	3.86	0	30	9	0.5	100	2
2019-03-31	0	0	0	820	2019	3	Spring	31	1	0	8.83	2.23	0	31	16	0.6	114	7
2019-04-01	0	0	0	821	2019	4	Spring	1	0	0	11.03	2.45	0	58	21	0.6	114	8
2019-04-02	0	0	0	822	2019	4	Spring	2	0	0	13.15	2.5	0	79	19	0.8	140	6
2019-04-03	0	0	0	823	2019	4	Spring	3	0	0	13.08	2.51	0	84	26	0.9	168	6
2019-04-04	0	0	0	824	2019	4	Spring	4	0	0	13.37	3.48	0	89	17	0.8	186	9
2019-04-05	0	0	0	825	2019	4	Spring	5	0	0	16.68	2.34	0	95	20	0.8	168	2
2019-04-06	0	0	0	826	2019	4	Spring	6	1	0	16.98	3.45	0	76	22	0.8	110	4
2019-04-07	0	0	0	827	2019	4	Spring	7	1	0	17.01	1.66	0.28	101	29	1.1	171	6
2019-04-08	0	0	0	828	2019	4	Spring	8	0	0	15.05	4.05	1.4	78	20	0.9	126	6
2019-04-09	0	0	0	829	2019	4	Spring	9	0	0	6.51	5.88	10.56	21	7	0.4	94	2
2019-04-10	0	0	0	830	2019	4	Spring	10	0	0	8.98	1.77	0.01	54	13	0.6	120	2
2019-04-11	0	0	0	831	2019	4	Spring	11	0	0	11.1	1.77	0.22	87	11	0.8	117	6
2019-04-12	0	0	0	832	2019	4	Spring	12	0	0	12.28	1.19	0	115	17	1	120	12
2019-04-13	0	0	0	833	2019	4	Spring	13	1	0	16.54	2.77	3.08	78	14	0.8	170	9
2019-04-14	0	0	0	834	2019	4	Spring	14	1	0	15.23	2.73	3.11	38	14	0.6	113	4
2019-04-15	0	0	1	835	2019	4	Spring	15	0	0	14.51	3.09	0	50	15	0.6	163	9
2019-04-16	0	0	0	836	2019	4	Spring	16	0	0	16.07	2.72	0	69	23	0.8	153	9
2019-04-17	0	0	0	837	2019	4	Spring	17	0	0	19.84	5.02	0	56	22	0.9	155	7
2019-04-18	0	0	0	838	2019	4	Spring	18	0	0	22.05	4.05	0	44	16	0.7	173	9
2019-04-19	0	0	0	839	2019	4	Spring	19	0	0	15.19	2.87	0.2	54	22	0.9	81	11
2019-04-20	0	0	0	840	2019	4	Spring	20	1	0	17.39	1.02	0	59	22	1	133	8
2019-04-21	0	0	0	841	2019	4	Spring	21	1	0	18.72	1.76	0.14	113	34	1.5	83	5
2019-04-22	0	0	0	842	2019	4	Spring	22	0	0	18.94	2.7	2.65	46	17	1	72	35
2019-04-23	0	0	0	843	2019	4	Spring	23	0	0	20.33	1.21	1.74	51	11	0.9	48	15
2019-04-24	0	0	0	844	2019	4	Spring	24	0	0	21.72	1.06	2.35	50	17	1	131	14
2019-04-25	0	0	0	845	2019	4	Spring	25	0	0	14.08	4.45	8.44	26	10	0.6	86	17
2019-04-26	0	0	0	846	2019	4	Spring	26	0	0	12.58	2.45	0.06	39	12	0.6	117	15
2019-04-27	0	1	0	847	2019	4	Spring	27	1	0	12.4	2.46	4.75	45	18	0.8	92	23
2019-04-28	0	0	0	848	2019	4	Spring	28	1	0	14.39	1.17	0.47	42	8	0.6	112	24
2019-04-29	0	0	0	849	2019	4	Spring	29	0	0	16.74	0.98	1.43	73	12	0.8	141	29
2019-04-30	0	0	0	850	2019	4	Spring	30	0	0	17.37	1.98	0.01	45	18	0.8	114	35
2019-05-01	0	0	0	851	2019	5	Spring	1	0	0	18.94	2.13	0	22	27	0.6	126	29
2019-05-02	0	0	0	852	2019	5	Spring	2	0	0	20.31	1.67	0	45	25	0.7	165	18
2019-05-03	0	0	0	853	2019	5	Spring	3	0	0	20.38	2.36	0	42	26	0.7	193	19
2019-05-04	0	0	0	854	2019	5	Spring	4	1	0	19.98	2.32	0.22	68	34	1	102	16
2019-05-05	0	0	0	855	2019	5	Spring	5	1	0	19.54	4.05	0	60	20	0.9	180	31
2019-05-06	0	0	0	856	2019	5	Spring	6	0	0	17.25	2.23	0	26	14	0.5	122	46
2019-05-07	1	0	0	857	2019	5	Spring	7	0	0	16.84	1.97	0	49	22	0.6	164	15
2019-05-08	0	0	0	858	2019	5	Spring	8	0	0	17.89	2.48	0	47	19	0.6	145	28
2019-05-09	0	0	0	859	2019	5	Spring	9	0	0	19.81	1.14	0	53	19	0.7	183	25
2019-05-10	0	0	0	860	2019	5	Spring	10	0	0	21.84	2.31	4.74	53	25	0.8	194	23
2019-05-11	0	0	0	861	2019	5	Spring	11	1	0	22.27	1.91	0	44	18	0.8	192	31
2019-05-12	0	0	0	862	2019	5	Spring	12	1	0	23.46	2.7	4.82	45	20	0.9	187	22
2019-05-13	0	0	0	863	2019	5	Spring	13	0	0	19.61	2.15	0.44	51	13	0.7	112	27
2019-05-14	0	0	0	864	2019	5	Spring	14	0	0	19.96	2.01	0	70	28	1	177	30
2019-05-15	0	0	0	865	2019	5	Spring	15	0	0	23.6	2.14	0.03	64	20	1	184	36
2019-05-16	0	0	0	866	2019	5	Spring	16	0	0	24.32	2.17	0	47	20	0.8	167	46
2019-05-17	0	0	0	867	2019	5	Spring	17	0	0	24.39	2.5	0.02	24	14	0.7	124	43
2019-05-18	0	0	0	868	2019	5	Spring	18	1	0	21.88	2.62	0	21	11	0.7	106	39
2019-05-19	0	0	0	869	2019	5	Spring	19	1	0	22.12	3.5	0	26	14	0.6	140	46
2019-05-20	0	0	0	870	2019	5	Spring	20	0	0	19.92	3.23	0	23	11	0.4	122	60
2019-05-21	0	0	0	871	2019	5	Spring	21	0	0	22.3	2.59	0	45	22	0.7	189	71
2019-05-22	0	0	0	872	2019	5	Spring	22	0	0	25.49	2.64	0	45	21	0.8	223	42
2019-05-23	0	0	0	873	2019	5	Spring	23	0	0	28.23	3.47	0	38	16	0.7	211	53
2019-05-24	0	0	0	874	2019	5	Spring	24	0	0	27.44	3.61	0	42	18	0.6	175	55
2019-05-25	0	0	0	875	2019	5	Spring	25	1	0	29.03	3.77	0.2	51	25	1	164	51
2019-05-26	0	0	0	876	2019	5	Spring	26	1	0	27.05	2.34	7.09	42	15	1	133	51
2019-05-27	0	0	0	877	2019	5	Spring	27	0	0	22.17	4.44	8.02	13	10	0.6	112	50
2019-05-28	0	0	0	878	2019	5	Spring	28	0	0	21.68	2.2	0	22	21	0.6	147	34
2019-05-29	0	0	0	879	2019	5	Spring	29	0	0	22.4	2.49	0	19	15	0.6	162	38
2019-05-30	0	0	0	880	2019	5	Spring	30	0	0	20.96	2.03	0.49	34	18	0.7	146	49
2019-05-31	0	0	0	881	2019	5	Spring	31	0	0	23.26	1.32	0	50	26	0.9	202	50
2019-06-01	0	0	0	882	2019	6	Summer	1	1	0	25.52	3.73	0.49	31	18	0.7	195	63
2019-06-02	0	0	0	883	2019	6	Summer	2	1	0	28.28	4.25	0.55	38	15	0.8	188	50
2019-06-03	0	0	0	884	2019	6	Summer	3	0	0	28.3	3.92	0.37	40	15	0.8	194	69
2019-06-04	0	0	0	885	2019	6	Summer	4	0	0	30.11	2.88	0	39	24	0.8	200	63
2019-06-05	0	0	0	886	2019	6	Summer	5	0	0	27.62	3.59	3.6	49	27	1.1	199	48
2019-06-06	1	0	0	887	2019	6	Summer	6	0	0	22.51	4.47	9.84	29	9	0.7	154	68
2019-06-07	0	0	0	888	2019	6	Summer	7	0	0	25.72	1.78	0.01	25	18	0.9	191	79
2019-06-08	0	0	1	889	2019	6	Summer	8	1	0	28.08	2.99	1.27	35	15	0.9	199	101
2019-06-09	0	0	0	890	2019	6	Summer	9	1	0	27.62	3.75	0.04	28	14	0.7	166	89
2019-06-10	0	0	0	891	2019	6	Summer	10	0	0	26.67	1.52	0	23	21	0.7	176	121
2019-06-11	0	0	0	892	2019	6	Summer	11	0	0	28.26	1.55	0	29	18	0.7	216	113
2019-06-12	0	0	0	893	2019	6	Summer	12	0	0	27.49	2.68	0	38	21	0.8	233	98
2019-06-13	0	0	0	894	2019	6	Summer	13	0	0	27.03	2.51	0.05	37	25	0.8	214	62
2019-06-14	0	0	0	895	2019	6	Summer	14	0	0	27.57	1.81	0.13	36	19	0.7	225	78
2019-06-15	0	0	0	896	2019	6	Summer	15	1	0	30.11	1.52	0	36	19	0.7	217	81
2019-06-16	0	0	0	897	2019	6	Summer	16	1	0	30.54	2.87	0	41	30	0.9	218	98
2019-06-17	0	0	0	898	2019	6	Summer	17	0	0	29.98	2.85	0.01	47	22	0.9	197	107
2019-06-18	0	0	0	899	2019	6	Summer	18	0	0	30.4	2.02	0	29	16	0.6	200	98
2019-06-19	0	0	0	900	2019	6	Summer	19	0	0	31.52	2.21	2.35	34	15	0.7	228	91
2019-06-20	0	0	0	901	2019	6	Summer	20	0	0	29.28	1.53	5.93	34	13	0.7	166	74
2019-06-21	0	0	0	902	2019	6	Summer	21	0	0	29.92	2.12	0.42	49	16	0.7	236	54
2019-06-22	0	0	0	903	2019	6	Summer	22	1	0	29.73	2.5	0.06	31	20	0.6	198	74
2019-06-23	1	0	0	904	2019	6	Summer	23	1	0	29.22	2.13	0	33	30	0.7	226	93
2019-06-24	0	0	0	905	2019	6	Summer	24	0	0	29.13	2.4	0	34	26	0.7	231	93
2019-06-25	0	0	0	906	2019	6	Summer	25	0	0	27.55	3.55	0	41	23	0.6	187	86
2019-06-26	0	0	0	907	2019	6	Summer	26	0	0	28.16	2.2	0	32	16	0.5	169	69
2019-06-27	0	0	0	908	2019	6	Summer	27	0	0	30.04	2.17	0.13	33	21	0.6	195	76
2019-06-28	0	0	0	909	2019	6	Summer	28	0	0	26.84	1.75	15.27	41	14	0.6	104	68
2019-06-29	0	0	0	910	2019	6	Summer	29	1	0	28.46	1.88	0.11	39	10	0.7	164	80
2019-06-30	0	0	0	911	2019	6	Summer	30	1	0	29.32	1.66	0.07	24	16	0.6	174	74
2019-07-01	0	0	0	912	2019	7	Summer	1	0	0	30.26	1.94	0	20	19	0.6	191	98
2019-07-02	0	0	0	913	2019	7	Summer	2	0	0	30.32	2.56	0.27	32	17	0.6	232	101
2019-07-03	0	0	0	914	2019	7	Summer	3	0	0	31.34	1.87	0.27	47	19	0.8	250	66
2019-07-04	0	0	0	915	2019	7	Summer	4	0	0	30.31	3.03	0	41	18	0.7	164	70
2019-07-05	0	0	0	916	2019	7	Summer	5	0	0	30.99	4.05	0	41	15	0.7	212	72
2019-07-06	0	0	0	917	2019	7	Summer	6	1	0	28.24	3.14	9.52	25	13	0.6	155	68
2019-07-07	0	0	0	918	2019	7	Summer	7	1	0	25.56	2.97	0.9	21	13	0.6	156	64
2019-07-08	0	0	0	919	2019	7	Summer	8	0	0	26.17	1.88	0.31	22	12	0.5	156	63
2019-07-09	0	0	0	920	2019	7	Summer	9	0	0	25.94	1.41	0.74	34	26	0.6	145	70
2019-07-10	0	0	0	921	2019	7	Summer	10	0	0	25.21	1.16	5.9	31	10	0.7	152	53
2019-07-11	0	0	0	922	2019	7	Summer	11	0	0	26.35	1.29	2.01	47	11	0.8	175	39
2019-07-12	0	0	0	923	2019	7	Summer	12	0	0	26.99	1.5	11.87	40	14	0.8	142	58
2019-07-13	0	0	0	924	2019	7	Summer	13	1	0	28.37	1.15	0.29	34	12	0.7	196	68
2019-07-14	0	0	0	925	2019	7	Summer	14	1	0	30.1	1.57	0.99	27	11	0.7	185	55
2019-07-15	0	0	0	926	2019	7	Summer	15	0	0	30.49	1.07	2.15	36	13	0.8	195	79
2019-07-16	0	0	0	927	2019	7	Summer	16	0	0	29.98	1.6	0.03	57	14	1	209	65
2019-07-17	0	0	0	928	2019	7	Summer	17	0	0	29.59	2.42	0.2	46	18	0.8	147	50
2019-07-18	0	0	0	929	2019	7	Summer	18	0	0	29.55	3.04	0.07	20	12	0.6	162	49
2019-07-19	0	0	0	930	2019	7	Summer	19	0	0	30.65	2.34	0.04	15	13	0.6	95	34
2019-07-20	0	0	0	931	2019	7	Summer	20	1	0	31.63	1.68	0.57	27	12	0.8	148	47
2019-07-21	0	0	0	932	2019	7	Summer	21	1	0	33.3	1.12	0	45	10	0.9	211	52
2019-07-22	0	0	0	933	2019	7	Summer	22	0	0	34.44	2.98	1.6	41	12	0.9	201	40
2019-07-23	0	0	0	934	2019	7	Summer	23	0	0	32.86	2.4	38.58	28	10	0.9	127	41
2019-07-24	0	0	0	935	2019	7	Summer	24	0	0	32.45	1.72	1.76	27	9	0.8	202	29
2019-07-25	0	0	0	936	2019	7	Summer	25	0	0	31.96	1.54	4.17	24	11	0.7	173	30
2019-07-26	0	0	0	937	2019	7	Summer	26	0	0	32.94	1.45	0.18	30	12	0.8	188	28
2019-07-27	0	0	0	938	2019	7	Summer	27	1	0	30.76	2.42	13.31	22	10	0.7	144	38
2019-07-28	0	0	0	939	2019	7	Summer	28	1	0	30.97	2.15	7.94	17	10	0.7	146	46
2019-07-29	0	0	0	940	2019	7	Summer	29	0	0	31.9	3.12	11.1	25	10	0.8	118	48
2019-07-30	0	0	0	941	2019	7	Summer	30	0	0	29.23	2.38	14.34	10	9	0.6	117	45
2019-07-31	0	0	0	942	2019	7	Summer	31	0	0	29.2	2	0.47	15	10	0.6	111	36
2019-08-01	0	0	0	943	2019	8	Summer	1	0	0	28.61	1.78	8.79	15	13	0.6	62	38
2019-08-02	0	0	0	944	2019	8	Summer	2	0	0	26.58	1.59	5.52	14	10	0.6	78	37
2019-08-03	0	0	0	945	2019	8	Summer	3	1	0	28.33	1.48	3.78	25	11	0.7	150	43
2019-08-04	0	0	0	946	2019	8	Summer	4	1	0	29.14	2.89	0.07	21	10	0.5	92	32
2019-08-05	0	0	0	947	2019	8	Summer	5	0	0	28.25	2.53	3.45	16	10	0.6	72	37
2019-08-06	0	0	0	948	2019	8	Summer	6	0	0	28.01	1.38	31.38	18	10	0.6	106	36
2019-08-07	0	0	0	949	2019	8	Summer	7	0	0	25.91	1.45	55.55	10	9	0.6	74	40
2019-08-08	0	0	0	950	2019	8	Summer	8	0	0	27.97	1.23	5.54	29	10	0.8	152	35
2019-08-09	0	0	0	951	2019	8	Summer	9	0	0	28.83	2.12	2.99	23	11	0.7	88	29
2019-08-10	0	0	0	952	2019	8	Summer	10	1	0	26.83	2.94	45.24	13	11	0.5	31	41
2019-08-11	0	0	0	953	2019	8	Summer	11	1	0	24.62	6.45	53.36	4	10	0.5	66	37
2019-08-12	0	0	0	954	2019	8	Summer	12	0	0	23.73	5.55	38.43	4	10	0.5	69	35
2019-08-13	0	0	0	955	2019	8	Summer	13	0	0	24.16	2.7	3.69	12	11	0.6	90	46
2019-08-14	0	0	0	956	2019	8	Summer	14	0	0	25.55	1.75	0.66	17	17	0.8	124	47
2019-08-15	0	0	0	957	2019	8	Summer	15	0	0	26.48	1.12	0.01	23	15	0.7	146	28
2019-08-16	0	0	0	958	2019	8	Summer	16	0	0	24.72	2.37	0.79	35	13	0.8	186	30
2019-08-17	0	0	0	959	2019	8	Summer	17	1	0	24.09	1.76	0	18	17	0.6	133	38
2019-08-18	0	0	0	960	2019	8	Summer	18	1	0	24.51	1.22	0	25	13	0.8	212	45
2019-08-19	0	0	0	961	2019	8	Summer	19	0	0	23.62	2.3	0	32	16	0.8	201	27
2019-08-20	0	0	0	962	2019	8	Summer	20	0	0	23.43	2.32	0	24	18	0.7	166	27
2019-08-21	0	0	0	963	2019	8	Summer	21	0	0	22.92	1.44	1.5	37	10	0.9	132	31
2019-08-22	0	0	0	964	2019	8	Summer	22	0	0	24.75	1.55	0.01	43	13	1	188	26
2019-08-23	0	0	0	965	2019	8	Summer	23	0	0	25.83	0.97	0	40	14	0.9	179	17
2019-08-24	0	0	0	966	2019	8	Summer	24	1	0	24.9	0.96	0.07	48	15	1.1	199	13
2019-08-25	0	0	0	967	2019	8	Summer	25	1	0	23.96	1.67	1.37	38	18	1	187	22
2019-08-26	0	0	0	968	2019	8	Summer	26	0	0	25.48	1.41	0.48	24	9	0.7	109	33
2019-08-27	0	0	0	969	2019	8	Summer	27	0	0	26.09	0.92	0.79	53	14	1.4	101	28
2019-08-28	0	0	0	970	2019	8	Summer	28	0	0	25.56	1.77	0.03	49	9	1.2	141	17
2019-08-29	0	0	0	971	2019	8	Summer	29	0	0	23.43	2.19	0	13	13	0.5	103	14
2019-08-30	0	1	0	972	2019	8	Summer	30	0	0	23.89	1.64	0	24	21	0.6	149	21
2019-08-31	0	0	0	973	2019	8	Summer	31	1	0	23.94	1.51	0	32	16	0.7	189	11
2019-09-01	0	0	0	974	2019	9	Autumn	1	1	0	24.22	1.89	0.55	29	12	0.6	149	23
2019-09-02	0	0	0	975	2019	9	Autumn	2	0	0	24.2	0.9	0.15	38	11	0.8	132	7
2019-09-03	0	0	0	976	2019	9	Autumn	3	0	0	23.3	1.58	0.09	30	9	0.8	128	13
2019-09-04	0	0	0	977	2019	9	Autumn	4	0	0	23.13	1.21	0.13	31	11	0.8	153	12
2019-09-05	0	0	0	978	2019	9	Autumn	5	0	0	23.76	0.99	0	40	12	0.9	176	13
2019-09-06	0	0	0	979	2019	9	Autumn	6	0	0	23.94	1.57	0	56	15	1	197	16
2019-09-07	0	0	0	980	2019	9	Autumn	7	1	0	24.64	1.77	0	66	19	1.2	194	14
2019-09-08	0	0	0	981	2019	9	Autumn	8	1	0	25.61	1.49	0	62	12	1.2	214	9
2019-09-09	0	0	0	982	2019	9	Autumn	9	0	0	25.5	1.8	0	67	14	1.2	193	12
2019-09-10	0	0	0	983	2019	9	Autumn	10	0	0	25.19	1.74	0	55	19	1.1	158	12
2019-09-11	0	0	0	984	2019	9	Autumn	11	0	0	23.59	2.48	2.96	20	15	0.9	40	23
2019-09-12	0	0	0	985	2019	9	Autumn	12	0	0	21.26	2.12	5.21	23	10	0.9	80	7
2019-09-13	0	0	0	986	2019	9	Autumn	13	0	0	23.08	2.81	1.84	33	13	1	59	10
2019-09-14	0	0	0	987	2019	9	Autumn	14	1	0	22.4	2.2	0.05	19	13	0.9	112	14
2019-09-15	0	0	0	988	2019	9	Autumn	15	1	0	21.48	0.62	0.61	24	12	0.9	45	14
2019-09-16	1	0	0	989	2019	9	Autumn	16	0	0	22.34	0.84	0.82	27	13	0.7	144	12
2019-09-17	0	0	0	990	2019	9	Autumn	17	0	0	21.83	1.3	0.01	50	18	1.2	89	16
2019-09-18	0	0	0	991	2019	9	Autumn	18	0	0	20.55	2.61	0	35	14	0.9	158	17
2019-09-19	0	0	0	992	2019	9	Autumn	19	0	0	19.13	1.34	0	26	16	0.7	39	6
2019-09-20	0	0	0	993	2019	9	Autumn	20	0	0	20.35	1.02	0	46	25	0.9	135	7
2019-09-21	0	0	0	994	2019	9	Autumn	21	1	0	20.57	2.31	0	60	21	0.9	167	18
2019-09-22	0	0	0	995	2019	9	Autumn	22	1	0	20.11	3.03	0	36	12	0.7	148	21
2019-09-23	0	0	0	996	2019	9	Autumn	23	0	0	21.61	1.06	0	28	11	0.8	166	10
2019-09-24	0	0	0	997	2019	9	Autumn	24	0	0	23.53	0.95	0	52	14	1	212	6
2019-09-25	0	0	0	998	2019	9	Autumn	25	0	0	24.62	0.9	0	53	14	1	203	8
2019-09-26	0	0	0	999	2019	9	Autumn	26	0	0	22.81	1.84	0	38	19	0.9	185	14
2019-09-27	0	0	0	1000	2019	9	Autumn	27	0	0	22.83	1.1	0	33	10	0.6	162	8
2019-09-28	0	0	0	1001	2019	9	Autumn	28	1	0	22.9	1.34	0	40	8	0.6	173	11
2019-09-29	0	0	0	1002	2019	9	Autumn	29	1	0	23.18	1.66	0	43	9	0.7	198	11
2019-09-30	0	0	0	1003	2019	9	Autumn	30	0	0	22.93	2.59	0	41	12	0.7	173	9
2019-10-01	0	0	0	1004	2019	10	Autumn	1	0	0	21.96	2.2	0	36	12	0.6	149	16
2019-10-02	0	0	0	1005	2019	10	Autumn	2	0	0	22.89	1.12	0	40	9	0.7	160	8
2019-10-03	0	0	0	1006	2019	10	Autumn	3	0	0	23.55	1.02	0	45	12	0.9	180	13
2019-10-04	0	0	0	1007	2019	10	Autumn	4	0	0	20.39	2.67	3.08	54	13	0.9	74	10
2019-10-05	0	0	0	1008	2019	10	Autumn	5	1	0	15.62	3.39	4.2	11	7	0.4	78	8
2019-10-06	0	0	0	1009	2019	10	Autumn	6	1	0	12.65	1.84	13.57	25	9	0.5	61	9
2019-10-07	0	0	0	1010	2019	10	Autumn	7	0	0	13.63	1.15	0.12	45	6	0.5	65	12
2019-10-08	0	0	0	1011	2019	10	Autumn	8	0	0	17.09	0.96	0	60	11	1.1	114	12
2019-10-09	0	0	0	1012	2019	10	Autumn	9	0	0	16.61	2.07	15.59	66	18	1.1	91	3
2019-10-10	0	0	0	1013	2019	10	Autumn	10	0	0	16.95	1.37	7.29	30	8	0.9	52	6
2019-10-11	0	0	0	1014	2019	10	Autumn	11	0	0	18.01	2.3	0.99	32	10	1.1	52	4
2019-10-12	0	0	0	1015	2019	10	Autumn	12	1	0	18.48	1.69	0.83	35	10	1.1	51	9
2019-10-13	0	0	0	1016	2019	10	Autumn	13	1	0	18.54	1.62	0.03	37	15	1	113	10
2019-10-14	0	0	0	1017	2019	10	Autumn	14	0	0	13.22	4.17	0.02	18	7	0.4	64	1
2019-10-15	0	0	0	1018	2019	10	Autumn	15	0	0	10.94	1.36	0	21	12	0.4	62	7
2019-10-16	0	0	0	1019	2019	10	Autumn	16	0	0	11.96	1.19	0.07	62	21	0.8	17	5
2019-10-17	0	0	0	1020	2019	10	Autumn	17	0	0	13.35	0.97	0.13	73	16	0.8	81	7
2019-10-18	0	0	0	1021	2019	10	Autumn	18	0	0	15.04	0.96	0	111	12	1.1	96	9
2019-10-19	0	0	0	1022	2019	10	Autumn	19	1	0	15.51	1.95	0	97	17	1	162	6
2019-10-20	0	0	0	1023	2019	10	Autumn	20	1	0	17.4	2.12	0	69	15	1.1	155	10
2019-10-21	0	0	0	1024	2019	10	Autumn	21	0	0	18.74	1.48	0	79	17	1.2	167	6
2019-10-22	0	0	0	1025	2019	10	Autumn	22	0	0	16.14	1.56	0	71	27	1.1	61	5
2019-10-23	0	0	0	1026	2019	10	Autumn	23	0	0	17.3	0.7	0	66	11	1.2	125	2
2019-10-24	0	0	0	1027	2019	10	Autumn	24	0	0	17.08	2.09	0.17	77	15	1.2	136	2
2019-10-25	0	0	0	1028	2019	10	Autumn	25	0	0	10.58	3.59	0.09	14	7	0.3	50	4
2019-10-26	0	0	0	1029	2019	10	Autumn	26	1	0	8.58	1.45	0.52	33	15	0.4	57	6
2019-10-27	0	0	0	1030	2019	10	Autumn	27	1	0	11.43	2.79	0	64	17	0.5	95	6
2019-10-28	0	0	0	1031	2019	10	Autumn	28	0	0	11.8	3.06	0	79	14	0.6	50	4
2019-10-29	0	0	0	1032	2019	10	Autumn	29	0	0	11.75	1.66	0	54	14	0.5	68	9
2019-10-30	0	0	0	1033	2019	10	Autumn	30	0	0	13.63	2.54	0	90	27	0.7	105	9
2019-10-31	0	0	0	1034	2019	10	Autumn	31	0	0	15.2	1.21	0	113	24	1.1	94	7
2019-11-01	0	0	0	1035	2019	11	Autumn	1	0	0	15.27	1.64	0	118	22	1.3	145	5
2019-11-02	0	0	0	1036	2019	11	Autumn	2	1	0	15.53	2.07	1.49	61	22	0.9	154	12
2019-11-03	0	0	0	1037	2019	11	Autumn	3	1	0	13.69	1.95	7.78	84	15	1	96	9
2019-11-04	0	0	0	1038	2019	11	Autumn	4	0	0	11.41	1.27	0.14	34	11	0.8	70	7
2019-11-05	0	0	0	1039	2019	11	Autumn	5	0	0	13	1.1	0	76	15	1.1	91	3
2019-11-06	0	0	0	1040	2019	11	Autumn	6	0	0	13.28	1.26	0	99	19	1.2	125	2
2019-11-07	0	0	0	1041	2019	11	Autumn	7	0	0	12.23	1.95	0	117	15	1.3	99	8
2019-11-08	0	0	0	1042	2019	11	Autumn	8	0	0	9.98	1.66	0	75	13	1	77	14
2019-11-09	0	0	0	1043	2019	11	Autumn	9	1	0	11.69	2.33	0.39	122	16	1	125	13
2019-11-10	0	0	0	1044	2019	11	Autumn	10	1	0	11.78	4.04	3.62	44	12	0.7	69	14
2019-11-11	0	0	0	1045	2019	11	Autumn	11	0	0	13.14	1.22	9.13	51	19	0.9	65	10
2019-11-12	0	0	0	1046	2019	11	Autumn	12	0	0	14.36	2.34	0.06	100	33	1	91	6
2019-11-13	0	0	0	1047	2019	11	Autumn	13	0	0	9.81	4.09	2.04	46	10	0.5	64	6
2019-11-14	0	0	0	1048	2019	11	Autumn	14	0	0	9.12	4.32	5.06	36	17	0.5	75	6
2019-11-15	0	0	0	1049	2019	11	Autumn	15	0	0	11.12	1.17	0	66	21	0.7	56	14
2019-11-16	0	0	0	1050	2019	11	Autumn	16	1	0	12.14	1.38	0	160	24	1.4	30	6
2019-11-17	0	0	0	1051	2019	11	Autumn	17	1	0	11.4	3.73	3.28	101	11	1	31	7
2019-11-18	0	0	0	1052	2019	11	Autumn	18	0	0	2.55	2.98	0	37	9	0.4	53	9
2019-11-19	0	0	0	1053	2019	11	Autumn	19	0	0	2.58	2.03	2.15	65	19	0.6	53	6
2019-11-20	0	0	0	1054	2019	11	Autumn	20	0	0	5.71	2.41	0	67	26	0.8	60	10
2019-11-21	0	0	0	1055	2019	11	Autumn	21	0	0	9.53	3.19	0	47	19	0.6	62	10
2019-11-22	0	0	0	1056	2019	11	Autumn	22	0	0	11.2	2.78	0.02	52	20	0.7	79	11
2019-11-23	0	0	0	1057	2019	11	Autumn	23	1	0	12.99	1.48	1.56	68	18	0.9	25	7
2019-11-24	0	1	0	1058	2019	11	Autumn	24	1	0	7.87	5.48	1.15	75	9	1	47	7
2019-11-25	0	0	0	1059	2019	11	Autumn	25	0	0	1.6	2.1	0	19	9	0.4	45	7
2019-11-26	0	0	0	1060	2019	11	Autumn	26	0	0	1.83	1.17	0	60	27	0.7	41	9
2019-11-27	0	0	0	1061	2019	11	Autumn	27	0	0	2.83	2.77	0	67	15	0.8	34	4
2019-11-28	0	0	0	1062	2019	11	Autumn	28	0	0	1.02	1.64	0	27	12	0.5	54	7
2019-11-29	0	0	0	1063	2019	11	Autumn	29	0	0	2.25	1.95	0	60	22	0.7	43	4
2019-11-30	0	0	0	1064	2019	11	Autumn	30	1	0	3.93	1.52	2.91	77	18	0.9	17	3
2019-12-01	0	0	0	1065	2019	12	Winter	1	1	0	2.85	2.56	1.47	73	14	0.9	53	7
2019-12-02	0	0	0	1066	2019	12	Winter	2	0	0	-0.01	2.2	0	51	17	0.7	55	1
2019-12-03	0	0	0	1067	2019	12	Winter	3	0	0	1.86	1.41	0	63	19	0.6	28	4
2019-12-04	0	0	0	1068	2019	12	Winter	4	0	0	2.67	1.41	0	71	29	0.9	49	5
2019-12-05	0	0	0	1069	2019	12	Winter	5	0	0	1.62	2.7	0	87	24	1	36	6
2019-12-06	0	0	0	1070	2019	12	Winter	6	0	0	-0.81	1.77	0	61	15	0.7	25	4
2019-12-07	0	0	0	1071	2019	12	Winter	7	1	0	1.26	1.4	0	107	19	1.1	50	5
2019-12-08	0	0	0	1072	2019	12	Winter	8	1	0	2.04	2.56	0	149	19	1.1	85	6
2019-12-09	0	0	0	1073	2019	12	Winter	9	0	0	4.4	1.51	0	217	19	1.6	47	5
2019-12-10	0	0	0	1074	2019	12	Winter	10	0	0	4.21	2.4	0	159	24	1.4	61	6
2019-12-11	0	0	0	1075	2019	12	Winter	11	0	0	2.62	2.02	0	111	19	1.5	47	5
2019-12-12	0	0	1	1076	2019	12	Winter	12	0	0	2.3	2.48	0	61	25	1.1	47	5
2019-12-13	0	0	0	1077	2019	12	Winter	13	0	0	4.37	2.44	0	107	24	1.1	32	2
2019-12-14	0	1	0	1078	2019	12	Winter	14	1	0	1.99	2.33	0.01	52	20	0.9	35	7
2019-12-15	0	1	0	1079	2019	12	Winter	15	1	0	4.82	2.91	5.27	42	14	0.7	11	2
2019-12-16	0	0	0	1080	2019	12	Winter	16	0	0	5.49	2.09	8.17	79	8	1.3	5	2
2019-12-17	0	0	0	1081	2019	12	Winter	17	0	0	2.79	3.24	0.11	97	9	1.2	24	5
2019-12-18	0	0	0	1082	2019	12	Winter	18	0	0	0.54	1.52	0	35	12	0.8	29	6
2019-12-19	0	0	0	1083	2019	12	Winter	19	0	0	0.73	1.62	0	121	14	1.2	32	1
2019-12-20	0	0	0	1084	2019	12	Winter	20	0	0	0.33	2.48	0	149	24	1.4	38	3
2019-12-21	0	0	0	1085	2019	12	Winter	21	1	0	3.15	1.5	0	138	18	1.2	62	3
2019-12-22	0	0	0	1086	2019	12	Winter	22	1	0	2.37	1.71	0	139	11	1.1	63	4
2019-12-23	0	0	0	1087	2019	12	Winter	23	0	0	1.25	2.33	0	138	12	1.5	40	3
2019-12-24	0	0	0	1088	2019	12	Winter	24	0	0	1.78	1.87	0.02	81	19	0.9	59	4
2019-12-25	0	0	0	1089	2019	12	Winter	25	0	0	3.89	2.09	7.34	115	12	1.4	9	5
2019-12-26	0	0	0	1090	2019	12	Winter	26	0	0	0.7	3.04	0.65	84	12	1.1	39	2
2019-12-27	0	1	0	1091	2019	12	Winter	27	0	0	0.37	2.96	0	58	11	0.7	61	2
2019-12-28	0	0	0	1092	2019	12	Winter	28	1	0	2.89	3.22	0	76	15	0.8	63	0
2019-12-29	0	0	0	1093	2019	12	Winter	29	1	0	6.26	2	0.02	92	26	1.1	67	3
2019-12-30	0	0	0	1094	2019	12	Winter	30	0	0	-0.61	5.42	0	77	29	1	49	3
2019-12-31	0	0	0	1095	2019	12	Winter	31	0	0	-4.06	1.89	0	23	10	0.5	48	4
2020-01-01				1096	2020	1	Winter	1	0	0	-0.21	1.91	0	71	32	0.9	28	4
2020-01-02				1097	2020	1	Winter	2	0	0	2.24	0.93	0	124	21	1.2	27	1
2020-01-03				1098	2020	1	Winter	3	0	0	3.12	0.85	0	182	14	1.5	42	2
2020-01-04				1099	2020	1	Winter	4	1	0	3.47	1.06	0	221	15	1.7	53	1
2020-01-05				1100	2020	1	Winter	5	1	0	2.59	3.07	12.21	146	10	1.6	48	1
2020-01-06				1101	2020	1	Winter	6	0	0	2.91	3.19	12.02	100	4	1.9	22	4
2020-01-07				1102	2020	1	Winter	7	0	0	-0.3	4.07	14.23	35	7	1.3	47	3
2020-01-08				1103	2020	1	Winter	8	0	0	-2.93	1.87	0	64	9	1	61	1
2020-01-09				1104	2020	1	Winter	9	0	0	-0.67	1.3	0	73	16	1.4	60	0
2020-01-10				1105	2020	1	Winter	10	0	0	0.38	1.34	0	108	19	1.4	48	0
2020-01-11				1106	2020	1	Winter	11	1	0	-0.99	1.66	0	185	18	2.1	23	2
2020-01-12				1107	2020	1	Winter	12	1	0	-0.67	1.09	0	87	18	1.4	50	4
2020-01-13				1108	2020	1	Winter	13	0	0	-1.24	1.77	0.23	143	17	1.6	20	3
2020-01-14				1109	2020	1	Winter	14	0	0	-2.48	1.75	0	88	14	1.1	67	0
2020-01-15				1110	2020	1	Winter	15	0	0	-0.95	1.47	0.18	95	18	1.2	61	0
2020-01-16				1111	2020	1	Winter	16	0	0	-0.73	1.27	0.66	115	23	1.5	40	0
2020-01-17				1112	2020	1	Winter	17	0	0	-0.15	0.71	0.01	139	12	1.3	68	0
2020-01-18				1113	2020	1	Winter	18	1	0	0.57	1.41	0	132	8	1.1	84	2
2020-01-19				1114	2020	1	Winter	19	1	1	1.34	1.67	0	166	7	1.6	52	0
2020-01-20				1115	2020	1	Winter	20	0	1	2.21	1.13	0	155	14	1.6	80	0
2020-01-21				1116	2020	1	Winter	21	0	1	0.59	2.87	0	127	21	1.3	97	2
2020-01-22				1117	2020	1	Winter	22	0	1	2.6	1.17	0	120	12	1.3	81	1
2020-01-23				1118	2020	1	Winter	23	0	1	3.68	1.12	0	157	10	1.6	71	1
2020-01-24				1119	2020	1	Winter	24	0	1	2.21	2.52	0	150	13	1.7	99	1
2020-01-25				1120	2020	1	Winter	25	1	1	3.19	1.34	0	114	29	1	77	0
2020-01-26				1121	2020	1	Winter	26	1	1	0.86	1.87	1.99	101	17	1.2	81	1
2020-01-27				1122	2020	1	Winter	27	0	1	1.62	1.6	0.24	83	14	1	87	1
2020-01-28				1123	2020	1	Winter	28	0	1	1.87	1.49	0	68	19	1	103	1
2020-01-29				1124	2020	1	Winter	29	0	1	0.76	2.2	0	166	22	1.7	109	1
2020-01-30				1125	2020	1	Winter	30	0	1	1.09	1.98	0	127	17	1.3	99	1
2020-01-31				1126	2020	1	Winter	31	0	1	1.92	2.19	0	83	14	0.9	118	1
2020-02-01				1127	2020	2	Winter	1	1	1	3.4	1.72	0	110	17	1	130	1
2020-02-02				1128	2020	2	Winter	2	1	1	3.44	2.98	0	125	18	1.3	112	0
2020-02-03				1129	2020	2	Winter	3	0	1	0.98	2.28	0	48	12	0.7	96	0
2020-02-04				1130	2020	2	Winter	4	0	1	2.36	3.14	0.06	102	11	1	88	1
2020-02-05				1131	2020	2	Winter	5	0	1	-0.43	4.05	0.08	39	7	0.6	71	0
2020-02-06				1132	2020	2	Winter	6	0	1	-0.63	2.43	0.75	35	6	0.6	64	0
2020-02-07				1133	2020	2	Winter	7	0	1	2.33	1.51	0.01	46	6	0.6	66	0
2020-02-08				1134	2020	2	Winter	8	1	1	4.01	0.93	0	56	6	0.6	90	0
2020-02-09				1135	2020	2	Winter	9	1	0	4.49	2.36	0	94	9	0.9	111	1
2020-02-10				1136	2020	2	Winter	10	0	0	6.02	2.65	0	65	8	0.8	109	0
2020-02-11				1137	2020	2	Winter	11	0	0	8.27	2.74	0	59	12	0.8	95	0
2020-02-12				1138	2020	2	Winter	12	0	0	8.95	2.18	0.02	60	7	0.9	82	0
2020-02-13				1139	2020	2	Winter	13	0	0	11.13	3.88	0.2	58	10	1	102	0
2020-02-14				1140	2020	2	Winter	14	0	0	8.01	4.97	4.63	52	5	1	40	0
2020-02-15				1141	2020	2	Winter	15	1	0	-3.6	5.12	21.12	19	7	0.6	73	0
2020-02-16				1142	2020	2	Winter	16	1	0	-6.78	2.95	0	18	9	0.5	86	0
2020-02-17				1143	2020	2	Winter	17	0	0	-3.54	2.55	0	30	12	0.6	90	0
2020-02-18				1144	2020	2	Winter	18	0	0	1.39	2.8	0	34	9	0.6	104	0
2020-02-19				1145	2020	2	Winter	19	0	0	2.46	2.72	0	51	14	0.7	105	0
2020-02-20				1146	2020	2	Winter	20	0	0	4.96	1.73	0	73	16	0.8	120	0
2020-02-21				1147	2020	2	Winter	21	0	0	6.72	1.98	2.77	97	11	1	99	0
2020-02-22				1148	2020	2	Winter	22	1	0	3.94	2.58	0	22	12	0.5	91	0
2020-02-23				1149	2020	2	Winter	23	1	0	7.41	3.99	0	65	14	0.7	121	0
2020-02-24				1150	2020	2	Winter	24	0	0	9.94	2.62	5.34	110	10	1.1	78	0
2020-02-25				1151	2020	2	Winter	25	0	0	9.12	3.14	0.8	86	6	1.1	65	0
2020-02-26				1152	2020	2	Winter	26	0	0	6.72	2.92	0.38	73	9	1.1	75	0
2020-02-27				1153	2020	2	Winter	27	0	0	3.3	2.21	4.42	24	7	0.5	69	0
2020-02-28				1154	2020	2	Winter	28	0	0	3.69	1.2	12.95	44	4	0.7	68	1
2020-02-29				1155	2020	2	Winter	29	1	0	5.63	1.24	4.83	58	4	0.8	78	0
2020-03-01				1156	2020	3	Spring	1	1	0	6.13	2.52	0.06	68	6	0.8	87	0
2020-03-02				1157	2020	3	Spring	2	0	0	4.33	1.9	0	72	8	0.9	93	0
2020-03-03				1158	2020	3	Spring	3	0	0	4.19	2.55	0	39	8	0.6	91	0
2020-03-04				1159	2020	3	Spring	4	0	0	2.75	2.63	0	21	9	0.6	92	0
2020-03-05				1160	2020	3	Spring	5	0	0	3.99	3.59	0	60	17	0.7	113	0
2020-03-06				1161	2020	3	Spring	6	0	0	7.94	3.79	0.02	81	16	0.8	100	0
2020-03-07				1162	2020	3	Spring	7	1	0	9.19	1.95	0.25	89	12	0.9	132	0
2020-03-08				1163	2020	3	Spring	8	1	0	9.01	3.57	0.34	92	12	1	132	0
2020-03-09				1164	2020	3	Spring	9	0	0	8.62	3.55	4.84	102	8	1.2	45	0
2020-03-10				1165	2020	3	Spring	10	0	0	7.19	2.18	0	54	5	0.7	99	0
2020-03-11				1166	2020	3	Spring	11	0	0	9.47	3.67	0	54	10	0.7	118	0
2020-03-12				1167	2020	3	Spring	12	0	0	11.98	3.56	0.01	58	11	0.8	120	2
2020-03-13				1168	2020	3	Spring	13	0	0	7.11	3.14	0.06	42	7	0.7	72	0
2020-03-14				1169	2020	3	Spring	14	1	0	8.01	3.2	0.19	42	9	0.7	94	0
2020-03-15				1170	2020	3	Spring	15	1	0	10.99	2.52	0	33	14	0.7	101	0
2020-03-16				1171	2020	3	Spring	16	0	0	9.42	3.82	0	38	15	0.6	82	0
2020-03-17				1172	2020	3	Spring	17	0	0	12.53	2.27	0	68	13	0.8	122	0
2020-03-18				1173	2020	3	Spring	18	0	0	14.94	4.58	0	52	14	0.7	129	0
2020-03-19				1174	2020	3	Spring	19	0	0	10.82	3.39	0	15	7	0.4	103	0
2020-03-20				1175	2020	3	Spring	20	0	0	13.98	3.96	0	45	14	0.6	137	0
2020-03-21				1176	2020	3	Spring	21	1	0	16.57	3.1	0	78	16	0.9	152	0
2020-03-22				1177	2020	3	Spring	22	1	0	14.01	2.14	0	47	13	0.8	119	0
2020-03-23				1178	2020	3	Spring	23	0	0	14.17	1.98	0	43	18	0.7	152	1
2020-03-24				1179	2020	3	Spring	24	0	0	14.51	3.46	0	41	19	0.7	124	0
2020-03-25				1180	2020	3	Spring	25	0	0	13.69	3.35	3.58	50	17	0.8	68	0
2020-03-26				1181	2020	3	Spring	26	0	0	11.66	5.01	0.93	43	7	1	64	1
2020-03-27				1182	2020	3	Spring	27	0	0	8.1	3.76	0	8	6	0.5	84	1
2020-03-28				1183	2020	3	Spring	28	1	0	8.55	1.68	0	19	10	0.5	98	0
2020-03-29				1184	2020	3	Spring	29	1	0	8.83	1.81	0	46	11	0.6	101	0
2020-03-30				1185	2020	3	Spring	30	0	0	10.2	1.35	0	63	8	0.7	126	0
2020-03-31				1186	2020	3	Spring	31	0	0	10.23	1.58	0	49	9	0.6	92	0
2020-04-01				1187	2020	4	Spring	1	0	0	11.92	2.27	0.16	45	14	0.7	100	0
2020-04-02				1188	2020	4	Spring	2	0	0	9.33	1.5	0.71	56	13	0.8	60	0
2020-04-03				1189	2020	4	Spring	3	0	0	12.15	0.84	0	86	13	0.9	104	1
2020-04-04				1190	2020	4	Spring	4	1	0	12.83	2.45	0	57	21	0.9	138	0
2020-04-05				1191	2020	4	Spring	5	1	0	11.23	2.2	0	39	18	0.9	116	0
2020-04-06				1192	2020	4	Spring	6	0	0	12.98	2.59	0	40	11	0.7	132	0
2020-04-07				1193	2020	4	Spring	7	0	0	14.79	2.26	0	44	11	0.7	137	0
2020-04-08				1194	2020	4	Spring	8	0	0	13.25	1.92	0.82	69	21	0.9	128	0
2020-04-09				1195	2020	4	Spring	9	0	0	11.53	3.28	3.93	47	9	0.8	74	0
2020-04-10				1196	2020	4	Spring	10	0	0	7.18	3.67	16.2	42	5	0.7	73	0
2020-04-11				1197	2020	4	Spring	11	1	0	9.88	2.62	0.51	57	10	0.9	130	0
2020-04-12				1198	2020	4	Spring	12	1	0	11.32	3.67	0	46	12	0.8	120	0
2020-04-13				1199	2020	4	Spring	13	0	0	15.02	1.27	0	50	13	0.7	147	0
2020-04-14				1200	2020	4	Spring	14	0	0	14.62	2.56	0	42	13	0.6	144	0
2020-04-15				1201	2020	4	Spring	15	0	0	17.63	3	0	54	20	1	150	0
2020-04-16				1202	2020	4	Spring	16	0	0	17.23	2.59	3.69	40	16	0.8	132	0
2020-04-17				1203	2020	4	Spring	17	0	0	14.65	3.12	0	46	12	0.7	152	2
2020-04-18				1204	2020	4	Spring	18	1	0	14.82	2.05	2.6	74	13	0.9	174	0
2020-04-19				1205	2020	4	Spring	19	1	0	14.03	1.67	7.63	54	6	0.9	141	0
2020-04-20				1206	2020	4	Spring	20	0	0	14.73	3.23	0	27	9	0.6	106	1
2020-04-21				1207	2020	4	Spring	21	0	0	13.28	2.73	0	34	15	0.7	119	0
2020-04-22				1208	2020	4	Spring	22	0	0	10.74	3.19	0	23	14	0.6	95	0
2020-04-23				1209	2020	4	Spring	23	0	0	11.65	2.23	0	37	14	0.6	111	0
2020-04-24				1210	2020	4	Spring	24	0	0	14.59	3.81	0	40	13	0.6	131	0
2020-04-25				1211	2020	4	Spring	25	1	0	14.67	3.66	0	38	16	0.7	121	0
2020-04-26				1212	2020	4	Spring	26	1	0	14.79	3.34	0.02	33	13	0.6	125	0
2020-04-27				1213	2020	4	Spring	27	0	0	15.87	1.27	0.3	31	12	0.6	137	1
2020-04-28				1214	2020	4	Spring	28	0	0	16.62	3.48	0.47	32	8	0.5	152	0
2020-04-29				1215	2020	4	Spring	29	0	0	20.04	3.45	0	47	15	0.9	201	0
2020-04-30				1216	2020	4	Spring	30	0	0	25.08	2.85	0	48	18	1.1	205	0
2020-05-01				1217	2020	5	Spring	1	0	0	25.52	3.95	0.06	41	10	0.8	153	1
2020-05-02				1218	2020	5	Spring	2	1	0	24.94	1.34	0.1	42	14	1	170	0
2020-05-03				1219	2020	5	Spring	3	1	0	26.55	2.57	0.06	69	15	1.3	194	0
2020-05-04				1220	2020	5	Spring	4	0	0	21.67	4.33	0.27	32	13	1	85	0
2020-05-05				1221	2020	5	Spring	5	0	0	17.41	2.52	8.69	23	9	0.8	135	0
2020-05-06				1222	2020	5	Spring	6	0	0	19.78	2.94	0.61	29	23	0.9	176	0
2020-05-07				1223	2020	5	Spring	7	0	0	19.29	3.31	2.34	32	12	0.9	98	0
2020-05-08				1224	2020	5	Spring	8	0	0	17.47	4.2	39.46	16	5	0.8	73	0
2020-05-09				1225	2020	5	Spring	9	1	0	15.25	3.25	0.8	23	6	0.7	101	0
2020-05-10				1226	2020	5	Spring	10	1	0	19.66	1.71	0.24	38	7	0.9	134	0
2020-05-11				1227	2020	5	Spring	11	0	0	17.3	3.38	2.15	20	9	0.6	113	0
2020-05-12				1228	2020	5	Spring	12	0	0	18.8	2.64	0	28	14	0.6	99	1
2020-05-13				1229	2020	5	Spring	13	0	0	22.44	4.08	0	55	14	0.9	168	0
2020-05-14				1230	2020	5	Spring	14	0	0	20.83	2.5	0.13	59	13	1	126	0
2020-05-15				1231	2020	5	Spring	15	0	0	22.69	0.97	0	47	6	0.9	165	0
2020-05-16				1232	2020	5	Spring	16	1	0	24.19	3.24	0.72	30	9	0.9	172	0
2020-05-17				1233	2020	5	Spring	17	1	0	24.68	2.79	2.21	44	13	0.9	174	0
2020-05-18				1234	2020	5	Spring	18	0	0	17.5	4.25	0.4	29	9	0.5	99	0
2020-05-19				1235	2020	5	Spring	19	0	0	20.27	2.21	0.53	35	16	0.7	162	0
2020-05-20				1236	2020	5	Spring	20	0	0	23.35	2.98	0	44	19	0.9	206	0
2020-05-21				1237	2020	5	Spring	21	0	0	25.23	3.59	0	48	18	1	257	1
2020-05-22				1238	2020	5	Spring	22	0	0	25.53	1.95	0.17	42	12	0.9	210	0
2020-05-23				1239	2020	5	Spring	23	1	0	24.25	4.06	0.9	46	12	0.9	192	1
2020-05-24				1240	2020	5	Spring	24	1	0	22.87	1.67	0	35	13	0.9	152	0
2020-05-25				1241	2020	5	Spring	25	0	0	24.73	2.47	0.01	27	11	0.7	172	0
2020-05-26				1242	2020	5	Spring	26	0	0	23.33	1.91	0.03	31	11	0.8	161	0
2020-05-27				1243	2020	5	Spring	27	0	0	24.37	2.87	0	26	12	0.8	183	0
2020-05-28				1244	2020	5	Spring	28	0	0	26.14	2.65	0	28	20	0.9	223	0
2020-05-29				1245	2020	5	Spring	29	0	0	25.43	3.37	0	39	13	0.8	170	0
2020-05-30				1246	2020	5	Spring	30	1	0	21.77	3.7	3.36	31	8	0.8	97	0
2020-05-31				1247	2020	5	Spring	31	1	0	23.86	2.74	3.89	37	6	0.8	174	0
2020-06-01				1248	2020	6	Summer	1	0	0	25.38	3.5	10.9	36	15	0.9	209	0
2020-06-02				1249	2020	6	Summer	2	0	0	26.34	2.23	0.31	46	10	0.7	143	0
2020-06-03				1250	2020	6	Summer	3	0	0	28.25	2.43	0	52	13	0.7	208	1
2020-06-04				1251	2020	6	Summer	4	0	0	29.48	2.55	0	54	11	0.6	217	0
2020-06-05				1252	2020	6	Summer	5	0	0	27.62	1.52	0	61	16	1	259	0
2020-06-06				1253	2020	6	Summer	6	1	0	29.23	1.62	0	48	12	0.9	263	0
2020-06-07				1254	2020	6	Summer	7	1	0	29.18	2.73	0	39	13	0.7	218	0
2020-06-08				1255	2020	6	Summer	8	0	0	29.54	4.02	0	42	14	0.8	222	0
2020-06-09				1256	2020	6	Summer	9	0	0	25.53	3.37	0.43	45	7	0.8	96	0
2020-06-10				1257	2020	6	Summer	10	0	0	27.78	1.88	1.17	21	7	0.8	171	0
2020-06-11				1258	2020	6	Summer	11	0	0	28.43	2.21	2.61	34	10	0.9	199	0
2020-06-12				1259	2020	6	Summer	12	0	0	22.55	3.2	39.96	19	6	0.8	101	0
2020-06-13				1260	2020	6	Summer	13	1	0	25.37	1.39	0.72	23	10	0.9	107	0
2020-06-14				1261	2020	6	Summer	14	1	0	28.05	1.58	0	28	11	1	213	0
2020-06-15				1262	2020	6	Summer	15	0	0	28.58	0.9	0.01	31	16	1	218	0
2020-06-16				1263	2020	6	Summer	16	0	0	24.75	1.7	5.64	36	9	0.9	127	0
2020-06-17				1264	2020	6	Summer	17	0	0	19.79	3.95	26.15	13	7	0.7	99	1
2020-06-18				1265	2020	6	Summer	18	0	0	20.57	2.52	9.06	13	5	0.7	103	0
2020-06-19				1266	2020	6	Summer	19	0	0	22.23	1.18	0.19	28	10	0.9	175	0
2020-06-20				1267	2020	6	Summer	20	1	0	24.79	2.45	0	31	11	0.9	177	1
2020-06-21				1268	2020	6	Summer	21	1	0	25.34	2.88	0	40	13	0.9	163	0
2020-06-22				1269	2020	6	Summer	22	0	0	23.34	2.84	0.93	20	8	0.7	123	0
2020-06-23				1270	2020	6	Summer	23	0	0	24.21	3.27	8.83	15	6	0.9	74	0
2020-06-24				1271	2020	6	Summer	24	0	0	25.73	2.34	0.02	22	11	0.8	181	0
2020-06-25				1272	2020	6	Summer	25	0	0	26.65	2.43	6.73	40	10	1.1	194	0
2020-06-26				1273	2020	6	Summer	26	0	0	27.23	2.38	2.98	32	10	0.9	166	0
2020-06-27				1274	2020	6	Summer	27	1	0	29.23	1.08	2.32	52	11	1.1	234	1
2020-06-28				1275	2020	6	Summer	28	1	0	27.96	2.57	1.02	39	9	1	155	0
2020-06-29				1276	2020	6	Summer	29	0	0	27.22	2.55	11.65	26	10	0.8	172	0
2020-06-30				1277	2020	6	Summer	30	0	0	24.16	2.43	42.49	18	7	0.8	150	0
2020-07-01				1278	2020	7	Summer	1	0	0	24.74	1.45	0	19	12	0.9	184	1
2020-07-02				1279	2020	7	Summer	2	0	0	24.71	2.93	7.45	41	11	1	138	0
2020-07-03				1280	2020	7	Summer	3	0	0	23.59	2.31	15.29	18	7	0.8	120	1
2020-07-04				1281	2020	7	Summer	4	1	0	23.81	1.91	0.04	27	7	0.8	141	1
2020-07-05				1282	2020	7	Summer	5	1	0	26.41	2.72	0.66	30	6	0.8	164	0
2020-07-06				1283	2020	7	Summer	6	0	0	29.02	2.38	0.98	38	10	1	215	0
2020-07-07				1284	2020	7	Summer	7	0	0	28.44	2.23	0.21	32	11	1	226	0
2020-07-08				1285	2020	7	Summer	8	0	0	27.56	2.43	0	35	10	0.9	208	0
2020-07-09				1286	2020	7	Summer	9	0	0	25.05	2.91	15.3	31	10	0.8	109	0
2020-07-10				1287	2020	7	Summer	10	0	0	25.96	1.07	0.74	28	10	1	195	0
2020-07-11				1288	2020	7	Summer	11	1	0	25.72	3.04	16.03	33	12	0.9	128	0
2020-07-12				1289	2020	7	Summer	12	1	0	22.12	5.12	46.12	8	5	0.7	85	0
2020-07-13				1290	2020	7	Summer	13	0	0	23.54	2.42	0.25	15	9	0.8	124	0
2020-07-14				1291	2020	7	Summer	14	0	0	24.99	0.82	0.34	37	9	0.9	116	0
2020-07-15				1292	2020	7	Summer	15	0	0	25.44	0.88	0.6	39	7	0.9	176	0
2020-07-16				1293	2020	7	Summer	16	0	0	26.19	1.66	0	36	6	0.8	160	0
2020-07-17				1294	2020	7	Summer	17	0	0	23.77	2.33	0.8	36	8	0.9	121	0
2020-07-18				1295	2020	7	Summer	18	1	0	24.23	2.43	4.38	16	7	0.9	113	0
2020-07-19				1296	2020	7	Summer	19	1	0	23.65	2.22	2.7	23	7	0.8	106	0
2020-07-20				1297	2020	7	Summer	20	0	0	26.16	1.33	0.01	30	8	0.8	189	0
2020-07-21				1298	2020	7	Summer	21	0	0	26.27	2.31	0.16	43	9	1	148	0
2020-07-22				1299	2020	7	Summer	22	0	0	24.12	3.37	73.21	15	3	0.8	87	0
2020-07-23				1300	2020	7	Summer	23	0	0	24.06	2.69	0.59	23	6	0.8	147	0
2020-07-24				1301	2020	7	Summer	24	0	0	25.09	1.12	0.03	28	9	0.9	196	0
2020-07-25				1302	2020	7	Summer	25	1	0	25.41	0.98	0	48	6	1	197	0
2020-07-26				1303	2020	7	Summer	26	1	0	24.56	1.35	7.13	35	4	1	80	2
2020-07-27				1304	2020	7	Summer	27	0	0	25.08	0.79	0.37	39	6	1.1	133	0
2020-07-28				1305	2020	7	Summer	28	0	0	26.24	1	0.05	31	5	0.9	141	0
2020-07-29				1306	2020	7	Summer	29	0	0	25.59	1.59	0.01	32	7	1	155	0
2020-07-30				1307	2020	7	Summer	30	0	0	26.92	2.31	10.8	28	7	1	135	0
2020-07-31				1308	2020	7	Summer	31	0	0	26.85	2.74	21.92	8	5	0.8	92	1
2020-08-01				1309	2020	8	Summer	1	1	0	27.56	1.55	13.29	23	4	0.9	118	0
2020-08-02				1310	2020	8	Summer	2	1	0	27.52	2.27	41.77	11	3	0.7	86	0
2020-08-03				1311	2020	8	Summer	3	0	0	29.01	2.65	9.61	14	4	0.8	90	0
2020-08-04				1312	2020	8	Summer	4	0	0	28.49	2.09	12.75	21	4	0.8	113	0
2020-08-05				1313	2020	8	Summer	5	0	0	28.1	1.25	1.55	39	5	1.2	93	0
2020-08-06				1314	2020	8	Summer	6	0	0	27.94	1.8	56.67	17	5	0.9	67	0
2020-08-07				1315	2020	8	Summer	7	0	0	27.99	1.79	51.56	18	4	0.9	70	1
2020-08-08				1316	2020	8	Summer	8	1	0	27.22	1.8	2.43	32	5	1.2	100	0
2020-08-09				1317	2020	8	Summer	9	1	0	27.7	1.12	0.12	34	6	1.1	153	2
2020-08-10				1318	2020	8	Summer	10	0	0	28.21	1.19	0	42	7	1.1	149	2
2020-08-11				1319	2020	8	Summer	11	0	0	27.84	1.74	0.06	44	6	1.2	162	1
2020-08-12				1320	2020	8	Summer	12	0	0	28.3	3.44	8.09	27	5	1	124	1
2020-08-13				1321	2020	8	Summer	13	0	0	28.46	3.67	15.79	14	5	0.8	88	2
2020-08-14				1322	2020	8	Summer	14	0	0	29.07	3.02	27.86	15	5	0.8	85	1
2020-08-15				1323	2020	8	Summer	15	1	0	28.5	2.41	12.44	21	5	0.8	99	0
2020-08-16				1324	2020	8	Summer	16	1	0	28.8	1.36	2.4	26	5	1	134	1
2020-08-17				1325	2020	8	Summer	17	0	0	29.7	1.91	0.74	25	4	0.9	140	1
2020-08-18				1326	2020	8	Summer	18	0	0	29.69	1.98	0.78	28	4	0.9	128	2
2020-08-19				1327	2020	8	Summer	19	0	0	27.74	1.7	3.37	21	6	0.9	101	3
2020-08-20				1328	2020	8	Summer	20	0	0	23.8	2.9	12.66	13	4	0.9	50	1
2020-08-21				1329	2020	8	Summer	21	0	0	23.01	1.81	3.75	22	6	1	86	3
2020-08-22				1330	2020	8	Summer	22	1	0	23.42	1.31	0.23	30	7	0.9	157	6
2020-08-23				1331	2020	8	Summer	23	1	0	26.58	2.27	1.59	42	7	1	108	2
2020-08-24				1332	2020	8	Summer	24	0	0	26.27	3.25	8.32	25	5	1	103	4
2020-08-25				1333	2020	8	Summer	25	0	0	24.28	2.02	0.02	15	9	1	154	2
2020-08-26				1334	2020	8	Summer	26	0	0	22.5	3.39	1.08	29	13	1.2	126	7
2020-08-27				1335	2020	8	Summer	27	0	0	23.17	1.9	0.6	21	9	0.9	160	10
2020-08-28				1336	2020	8	Summer	28	0	0	25.61	0.84	0	30	7	1	221	7
2020-08-29				1337	2020	8	Summer	29	1	0	25.83	1.29	0	45	7	1.1	214	3
2020-08-30				1338	2020	8	Summer	30	1	0	26.11	1.36	0.43	45	9	1.2	176	7
2020-08-31				1339	2020	8	Summer	31	0	0	27.01	1.3	1.5	58	7	1.3	214	10
2020-09-01				1340	2020	9	Autumn	1	0	0	25.28	1.59	0.07	39	8	1	151	13
2020-09-02				1341	2020	9	Autumn	2	0	0	23.3	2.47	0	19	10	0.8	133	9
2020-09-03				1342	2020	9	Autumn	3	0	0	21.44	2.14	0	14	11	0.7	124	6
2020-09-04				1343	2020	9	Autumn	4	0	0	23.24	1.61	0	30	15	0.9	201	7
2020-09-05				1344	2020	9	Autumn	5	1	0	24.68	2.4	0	25	9	0.7	161	8
2020-09-06				1345	2020	9	Autumn	6	1	0	25.9	1.25	0	33	9	0.9	183	8
2020-09-07				1346	2020	9	Autumn	7	0	0	25.1	1.45	1.02	50	16	1.1	231	14
2020-09-08				1347	2020	9	Autumn	8	0	0	25.25	1.01	1.41	26	7	0.9	174	10
2020-09-09				1348	2020	9	Autumn	9	0	0	25.13	1.1	0.01	28	11	1	153	10
2020-09-10				1349	2020	9	Autumn	10	0	0	24.26	0.87	0.89	30	8	0.9	144	16
2020-09-11				1350	2020	9	Autumn	11	0	0	20.72	2.31	0.09	19	8	0.9	90	18
2020-09-12				1351	2020	9	Autumn	12	1	0	20.87	1.83	0	25	11	1	124	17
2020-09-13				1352	2020	9	Autumn	13	1	0	22.08	1.2	0.02	38	11	1.1	122	20
2020-09-14				1353	2020	9	Autumn	14	0	0	22.16	1.7	1.57	31	10	1	131	19
2020-09-15				1354	2020	9	Autumn	15	0	0	23.08	2.71	1.07	31	13	1	144	16
2020-09-16				1355	2020	9	Autumn	16	0	0	21.17	2.09	0.39	33	12	1	156	15
2020-09-17				1356	2020	9	Autumn	17	0	0	18.67	1.39	0.26	15	15	0.8	93	13
2020-09-18				1357	2020	9	Autumn	18	0	0	19.61	1.73	0	35	14	1	161	12
2020-09-19				1358	2020	9	Autumn	19	1	0	20.89	1.75	0	29	10	0.8	161	21
2020-09-20				1359	2020	9	Autumn	20	1	0	22.11	1.41	0	35	14	0.9	176	23
2020-09-21				1360	2020	9	Autumn	21	0	0	23.76	0.56	0.18	57	15	1.2	131	14
2020-09-22				1361	2020	9	Autumn	22	0	0	21.58	1.3	0.07	47	11	1	152	14
2020-09-23				1362	2020	9	Autumn	23	0	0	21.3	1.27	0.37	22	14	0.9	115	20
2020-09-24				1363	2020	9	Autumn	24	0	0	20.26	1.3	0.83	49	14	1	146	19
2020-09-25				1364	2020	9	Autumn	25	0	0	19.8	1.32	0.09	55	13	1.3	162	18
2020-09-26				1365	2020	9	Autumn	26	1	0	20.01	1.8	0	37	10	1	172	18
2020-09-27				1366	2020	9	Autumn	27	1	0	20.02	1.78	0	20	15	0.8	134	26
2020-09-28				1367	2020	9	Autumn	28	0	0	20	1.67	0	23	22	0.7	134	22
2020-09-29				1368	2020	9	Autumn	29	0	0	19.83	1.45	0.01	36	20	0.9	138	22
2020-09-30				1369	2020	9	Autumn	30	0	0	19.1	1.63	0	30	12	1	132	18
2020-10-01				1370	2020	10	Autumn	1	0	0	19.9	2.46	0.03	41	12	1	155	13
2020-10-02				1371	2020	10	Autumn	2	0	0	17.6	1.91	1.19	34	10	0.8	69	12
2020-10-03				1372	2020	10	Autumn	3	1	0	15.98	1.25	0.05	48	21	1.3	25	14
2020-10-04				1373	2020	10	Autumn	4	1	0	11.6	3.67	0	30	9	0.8	58	20
2020-10-05				1374	2020	10	Autumn	5	0	0	10.57	1.39	0	29	13	0.8	42	26
2020-10-06				1375	2020	10	Autumn	6	0	0	12.65	0.81	0	46	13	0.9	68	19
2020-10-07				1376	2020	10	Autumn	7	0	0	14.66	1.25	0	49	15	1	110	20
2020-10-08				1377	2020	10	Autumn	8	0	0	15.1	1.36	0	45	12	1.1	115	21
2020-10-09				1378	2020	10	Autumn	9	0	0	16.86	1.15	0	35	10	1.1	128	17
2020-10-10				1379	2020	10	Autumn	10	1	0	16.89	1.27	0.05	54	18	1.4	55	17
2020-10-11				1380	2020	10	Autumn	11	1	0	17.44	1.38	1.21	47	13	1	62	11
2020-10-12				1381	2020	10	Autumn	12	0	0	16.37	2.29	0.01	33	8	0.8	97	11
2020-10-13				1382	2020	10	Autumn	13	0	0	15.87	1.04	3.91	48	10	0.9	56	12
2020-10-14				1383	2020	10	Autumn	14	0	0	13.53	1.55	11.83	36	7	0.9	47	13
2020-10-15				1384	2020	10	Autumn	15	0	0	13.58	1.22	0.49	31	11	1	63	17
2020-10-16				1385	2020	10	Autumn	16	0	0	13.67	1.81	0.76	53	9	0.9	53	20
2020-10-17				1386	2020	10	Autumn	17	1	0	12.07	1.3	0	59	13	0.8	93	23
2020-10-18				1387	2020	10	Autumn	18	1	0	13.05	1.22	0	64	11	0.8	115	23
2020-10-19				1388	2020	10	Autumn	19	0	0	14.12	1.04	0	85	14	0.9	141	21
2020-10-20				1389	2020	10	Autumn	20	0	0	12.85	2.11	0	97	19	1	154	29
2020-10-21				1390	2020	10	Autumn	21	0	0	12.88	2.63	0	77	12	0.8	101	21
2020-10-22				1391	2020	10	Autumn	22	0	0	11.33	2.05	0	51	16	0.8	74	28
2020-10-23				1392	2020	10	Autumn	23	0	0	8.99	2	0	26	13	0.6	70	30
2020-10-24				1393	2020	10	Autumn	24	1	0	10.28	1.48	0	38	18	0.8	91	23
2020-10-25				1394	2020	10	Autumn	25	1	0	12.98	2.05	0	81	20	0.9	123	29
2020-10-26				1395	2020	10	Autumn	26	0	0	15.59	1.12	0	87	21	1.2	179	40
2020-10-27				1396	2020	10	Autumn	27	0	0	14.49	1.94	0.13	96	18	1.4	48	29
2020-10-28				1397	2020	10	Autumn	28	0	0	13.73	1.3	0.01	42	19	1.1	13	25
2020-10-29				1398	2020	10	Autumn	29	0	0	13.57	1.1	0.07	55	22	1.1	88	26
2020-10-30				1399	2020	10	Autumn	30	0	0	13.73	1.12	0.01	82	17	1.1	94	42
2020-10-31				1400	2020	10	Autumn	31	1	0	14.26	2.38	0.41	77	16	1	69	18
2020-11-01				1401	2020	11	Autumn	1	1	0	12.94	1.73	0.03	93	18	1.1	72	40
2020-11-02				1402	2020	11	Autumn	2	0	0	9.95	2.7	0	53	13	0.8	61	49
2020-11-03				1403	2020	11	Autumn	3	0	0	8.83	1.3	0	30	13	0.7	50	33
2020-11-04				1404	2020	11	Autumn	4	0	0	9.96	2.48	0	43	16	0.7	79	38
2020-11-05				1405	2020	11	Autumn	5	0	0	11.87	2.19	0	56	24	0.8	73	38
2020-11-06				1406	2020	11	Autumn	6	0	0	12.8	1.86	0	116	16	1.4	102	57
2020-11-07				1407	2020	11	Autumn	7	1	0	10.53	2.02	0	53	24	1	73	33
2020-11-08				1408	2020	11	Autumn	8	1	0	8.62	2.31	0	31	17	0.7	60	27
2020-11-09				1409	2020	11	Autumn	9	0	0	9.26	1.31	0	48	20	1	52	41
2020-11-10				1410	2020	11	Autumn	10	0	0	10.03	1.54	0	82	29	1.1	127	26
2020-11-11				1411	2020	11	Autumn	11	0	0	11.26	2.8	0	77	28	0.9	127	30
2020-11-12				1412	2020	11	Autumn	12	0	0	12.47	2.45	0	76	19	0.9	110	25
2020-11-13				1413	2020	11	Autumn	13	0	0	12.44	1.38	0	140	27	1.5	115	31
2020-11-14				1414	2020	11	Autumn	14	1	0	12.18	2.13	0	77	15	1	102	25
2020-11-15				1415	2020	11	Autumn	15	1	0	12.65	2.16	0	71	11	1	124	25
2020-11-16				1416	2020	11	Autumn	16	0	0	12.91	2.48	0	64	8	0.9	125	34
2020-11-17				1417	2020	11	Autumn	17	0	0	14.25	3.52	38.21	39	5	0.9	65	16
2020-11-18				1418	2020	11	Autumn	18	0	0	14.83	3.87	58.87	17	4	1.3	27	20
2020-11-19				1419	2020	11	Autumn	19	0	0	9.23	2.66	0.3	30	6	1.1	45	11
2020-11-20				1420	2020	11	Autumn	20	0	0	4.77	2.35	0.01	34	9	0.9	66	19
2020-11-21				1421	2020	11	Autumn	21	1	0	4.68	2.68	8.46	55	5	0.7	42	20
2020-11-22				1422	2020	11	Autumn	22	1	0	2.4	3.52	0.43	33	6	1	49	35
2020-11-23				1423	2020	11	Autumn	23	0	0	1.09	1.17	0.82	29	8	0.5	39	34
2020-11-24				1424	2020	11	Autumn	24	0	0	3.19	0.6	0.01	46	11	0.6	49	31
2020-11-25				1425	2020	11	Autumn	25	0	0	4.04	1.09	0.19	93	15	0.9	46	16
2020-11-26				1426	2020	11	Autumn	26	0	0	4.86	1.3	0.23	135	15	1.5	11	22
2020-11-27				1427	2020	11	Autumn	27	0	0	4.16	2.06	0.02	82	13	1.3	35	16
2020-11-28				1428	2020	11	Autumn	28	1	0	1.19	1.21	0	49	16	1	26	10
2020-11-29				1429	2020	11	Autumn	29	1	0	1.86	1.23	0	112	11	1.1	34	17
2020-11-30				1430	2020	11	Autumn	30	0	0	1.33	1.45	0	125	17	1.3	34	21
2020-12-01				1431	2020	12	Winter	1	0	0	0.54	1.4	2.17	96	15	1.1	30	37
2020-12-02				1432	2020	12	Winter	2	0	0	0.2	1.52	1.02	117	9	1.3	32	19
2020-12-03				1433	2020	12	Winter	3	0	0	-0.92	2.49	0	80	10	0.9	49	25
2020-12-04				1434	2020	12	Winter	4	0	0	1.04	0.86	0	64	12	0.9	48	21
2020-12-05				1435	2020	12	Winter	5	1	0	1.51	1.36	0	88	14	0.9	75	19
2020-12-06				1436	2020	12	Winter	6	1	0	2.55	1.55	0	86	16	1	62	13
2020-12-07				1437	2020	12	Winter	7	0	0	1.62	2.84	0	93	15	1.1	48	18
2020-12-08				1438	2020	12	Winter	8	0	0	0.22	1.51	0	42	19	0.8	51	16
2020-12-09				1439	2020	12	Winter	9	0	0	1.02	2	0.09	62	27	0.9	15	15
2020-12-10				1440	2020	12	Winter	10	0	0	3.9	0.89	0.15	122	10	1	38	7
2020-12-11				1441	2020	12	Winter	11	0	0	1.8	0.89	0	175	10	1.5	53	14
2020-12-12				1442	2020	12	Winter	12	1	0	3.19	1.12	0	135	8	1.5	41	10
2020-12-13				1443	2020	12	Winter	13	1	0	-1.23	5.2	0.02	45	7	0.7	66	12
2020-12-14				1444	2020	12	Winter	14	0	0	-3.53	1.67	0	17	11	0.4	52	10
2020-12-15				1445	2020	12	Winter	15	0	0	-1.46	1.3	0	42	12	0.7	57	17
2020-12-16				1446	2020	12	Winter	16	0	0	-0.66	0.97	0	80	15	1	47	9
2020-12-17				1447	2020	12	Winter	17	0	0	-0.68	1.52	0	89	14	1.1	68	10
2020-12-18				1448	2020	12	Winter	18	0	0	0.15	2.55	0	79	14	1.1	56	15
2020-12-19				1449	2020	12	Winter	19	1	0	-0.72	1.12	0	50	11	0.8	59	7
2020-12-20				1450	2020	12	Winter	20	1	0	0.36	1.38	0	89	15	1.2	47	8
2020-12-21				1451	2020	12	Winter	21	0	0	0.84	1.38	0	124	18	1.5	56	12
2020-12-22				1452	2020	12	Winter	22	0	0	0.99	2.34	0	94	16	1.1	94	14
2020-12-23				1453	2020	12	Winter	23	0	0	1.55	1.94	0	86	23	1.4	75	14
2020-12-24				1454	2020	12	Winter	24	0	0	1.22	1.59	0	81	23	1.6	66	7
2020-12-25				1455	2020	12	Winter	25	0	0	1.61	2.16	0	109	25	1.5	79	5
2020-12-26				1456	2020	12	Winter	26	1	0	2.73	2.05	0	100	25	1.3	65	3
2020-12-27				1457	2020	12	Winter	27	1	0	5.05	1.18	0	147	18	1.6	124	6
2020-12-28				1458	2020	12	Winter	28	0	0	3.75	2.02	1.54	189	18	2	50	1
2020-12-29				1459	2020	12	Winter	29	0	0	-3.95	6.46	5.84	23	7	0.7	47	2
2020-12-30				1460	2020	12	Winter	30	0	0	-8.71	4.12	0	21	13	0.7	61	8
2020-12-31				1461	2020	12	Winter	31	0	0	-6.84	1.89	0	43	23	0.9	50	2
2021-01-01				1462	2021	1	Winter	1	0	0	-4.46	1.88	0	52	12	0.8	48	3
2021-01-02				1463	2021	1	Winter	2	1	0	-2.4	2.04	0	102	20	1.2	52	1
2021-01-03				1464	2021	1	Winter	3	1	0	-0.45	0.93	0	164	23	2	27	3
2021-01-04				1465	2021	1	Winter	4	0	0	-1.49	2.01	0	197	18	2.1	30	2
2021-01-05				1466	2021	1	Winter	5	0	0	-3.39	2.56	0	67	15	1.1	58	4
2021-01-06				1467	2021	1	Winter	6	0	0	-7.04	4.27	0	75	10	1	57	4
2021-01-07				1468	2021	1	Winter	7	0	0	-12.24	3.66	0	17	10	0.4	59	2
2021-01-08				1469	2021	1	Winter	8	0	0	-7.7	2.62	0	37	16	0.8	57	3
2021-01-09				1470	2021	1	Winter	9	1	0	-5	1.7	0	46	18	1	55	2
2021-01-10				1471	2021	1	Winter	10	1	0	-3.89	2.12	0	53	22	1	51	3
2021-01-11				1472	2021	1	Winter	11	0	0	-2.99	2.41	0	50	20	1	64	2
2021-01-12				1473	2021	1	Winter	12	0	0	-1.72	2.69	0	45	14	0.8	52	0
2021-01-13				1474	2021	1	Winter	13	0	0	1.95	1.65	0	77	19	1	50	1
2021-01-14				1475	2021	1	Winter	14	0	0	2.99	3.4	0	106	27	1.2	72	2
2021-01-15				1476	2021	1	Winter	15	0	0	1.18	2.93	0	89	19	1.3	51	0
2021-01-16				1477	2021	1	Winter	16	1	0	-1.57	1.57	0	65	12	0.9	52	2
2021-01-17				1478	2021	1	Winter	17	1	0	-1.1	2.72	0	70	20	1	68	1
2021-01-18				1479	2021	1	Winter	18	0	0	-0.39	1.78	0	61	17	0.8	54	1
2021-01-19				1480	2021	1	Winter	19	0	0	1.41	4.42	0	58	15	0.8	82	2
2021-01-20				1481	2021	1	Winter	20	0	0	1.97	2.27	0	71	11	0.8	62	1
2021-01-21				1482	2021	1	Winter	21	0	0	2.56	1.27	0	161	16	1.4	39	1
2021-01-22				1483	2021	1	Winter	22	0	0	1.01	1.71	0	235	20	2.3	50	2
2021-01-23				1484	2021	1	Winter	23	1	0	2.04	1.12	0	221	20	2.4	62	1
2021-01-24				1485	2021	1	Winter	24	1	0	2.44	1.32	0	220	24	2.1	42	2
2021-01-25				1486	2021	1	Winter	25	0	0	2.06	1.52	6.7	166	12	2.1	20	0
2021-01-26				1487	2021	1	Winter	26	0	0	2.93	2.18	0.08	123	16	1.8	91	2
2021-01-27				1488	2021	1	Winter	27	0	0	2.69	3.05	0.4	110	13	1.4	92	2
2021-01-28				1489	2021	1	Winter	28	0	0	-1.27	4.09	0	50	9	0.8	71	1
2021-01-29				1490	2021	1	Winter	29	0	0	0.9	3.54	0	52	12	0.8	78	0
2021-01-30				1491	2021	1	Winter	30	1	0	4.81	1.17	0	78	14	1.1	82	1
2021-01-31				1492	2021	1	Winter	31	1	0	4.38	2.17	0	86	21	1.2	75	0
2021-02-01				1493	2021	2	Winter	1	0	0	2.62	2.94	0	60	13	1	71	0
2021-02-02				1494	2021	2	Winter	2	0	0	0.05	1.74	0	41	14	1	73	0
2021-02-03				1495	2021	2	Winter	3	0	0	1.72	3.1	0	79	16	1.1	78	1
2021-02-04				1496	2021	2	Winter	4	0	0	1.65	2.52	0	68	16	1	78	0
2021-02-05				1497	2021	2	Winter	5	0	0	5.21	2.72	0	71	15	0.9	97	1
2021-02-06				1498	2021	2	Winter	6	1	1	6.37	1.83	0	67	15	0.9	95	0
2021-02-07				1499	2021	2	Winter	7	1	1	3.82	3.63	0	69	14	1	81	0
2021-02-08				1500	2021	2	Winter	8	0	1	1.15	1.52	0	31	13	0.7	84	0
2021-02-09				1501	2021	2	Winter	9	0	1	2.55	2.99	0	39	12	0.7	89	0
2021-02-10				1502	2021	2	Winter	10	0	1	5.15	1.65	0	64	16	1	106	2
2021-02-11				1503	2021	2	Winter	11	0	1	6.72	2.77	0	98	18	1	117	0
2021-02-12				1504	2021	2	Winter	12	0	1	10.12	3.27	0.2	72	12	0.8	93	0
2021-02-13				1505	2021	2	Winter	13	1	1	9.82	2.5	0.4	58	12	0.9	90	0
2021-02-14				1506	2021	2	Winter	14	1	1	10.65	2.13	12.58	80	7	1.1	53	1
2021-02-15				1507	2021	2	Winter	15	0	1	2.75	3.28	0.36	43	6	0.8	86	2
2021-02-16				1508	2021	2	Winter	16	0	1	1.49	4.22	0	42	7	0.8	89	1
2021-02-17				1509	2021	2	Winter	17	0	1	-1.4	2.46	0	19	11	0.8	85	2
2021-02-18				1510	2021	2	Winter	18	0	1	2.67	2.43	0	52	12	0.9	102	1
2021-02-19				1511	2021	2	Winter	19	0	1	7.85	3.4	0	55	11	0.8	112	0
2021-02-20				1512	2021	2	Winter	20	1	1	9.67	2.77	0	48	12	0.8	96	0
2021-02-21				1513	2021	2	Winter	21	1	1	14.12	2.52	0	50	12	0.8	117	0
2021-02-22				1514	2021	2	Winter	22	0	1	8.58	4.36	0	58	13	1	88	1
2021-02-23				1515	2021	2	Winter	23	0	1	5.12	3.91	0	20	10	0.8	88	0
2021-02-24				1516	2021	2	Winter	24	0	1	4.53	3.73	17.56	26	8	0.8	65	0
2021-02-25				1517	2021	2	Winter	25	0	1	2.29	2.88	13.91	43	6	1.1	58	0
2021-02-26				1518	2021	2	Winter	26	0	1	1.14	2.29	0	73	12	1.2	98	1
2021-02-27				1519	2021	2	Winter	27	1	0	5.32	2.66	0	61	14	0.9	100	1
2021-02-28				1520	2021	2	Winter	28	1	0	8.44	2.9	16	45	8	1	46	1
2021-03-01				1521	2021	3	Spring	1	0	0	2.17	4.55	4.02	24	6	0.8	66	0
2021-03-02				1522	2021	3	Spring	2	0	0	2.72	2.05	0	52	8	0.9	101	0
2021-03-03				1523	2021	3	Spring	3	0	0	5.89	3.85	0	40	9	0.8	98	0
2021-03-04				1524	2021	3	Spring	4	0	0	8.24	2.8	0.67	62	12	1	109	1
2021-03-05				1525	2021	3	Spring	5	0	0	10.72	3.11	0.03	61	12	1	112	0
2021-03-06				1526	2021	3	Spring	6	1	0	2.64	4.27	0.03	44	9	0.8	53	0
2021-03-07				1527	2021	3	Spring	7	1	0	4.07	1.1	0	58	17	1	56	0
2021-03-08				1528	2021	3	Spring	8	0	0	6.34	1.54	0.01	84	14	1.1	108	1
2021-03-09				1529	2021	3	Spring	9	0	0	9	1.34	0.2	55	8	0.8	96	0
2021-03-10				1530	2021	3	Spring	10	0	0	9.68	1.8	0.07	59	9	0.9	118	0
2021-03-11				1531	2021	3	Spring	11	0	0	7.43	2.04	3.55	71	10	1	119	0
2021-03-12				1532	2021	3	Spring	12	0	0	8.99	1.38	0	61	8	1	123	1
2021-03-13				1533	2021	3	Spring	13	1	0	10.04	1.03	0	60	8	0.8	115	1
2021-03-14				1534	2021	3	Spring	14	1	0	10.69	2.64	0	84	11	1	144	1
2021-03-15				1535	2021	3	Spring	15	0	0	13.3	2.89	0.59	111	12	1.2	94	0
2021-03-16				1536	2021	3	Spring	16	0	0	8.3	2.57	0	80	10	0.8	84	0
2021-03-17				1537	2021	3	Spring	17	0	0	8.84	2.29	0	50	21	0.9	110	0
2021-03-18				1538	2021	3	Spring	18	0	0	7.98	2.2	1.46	38	14	1.1	50	2
2021-03-19				1539	2021	3	Spring	19	0	0	8.79	1.8	2.16	55	16	1.2	60	0
2021-03-20				1540	2021	3	Spring	20	1	0	6.81	2.52	1.37	61	8	1	70	0
2021-03-21				1541	2021	3	Spring	21	1	0	5.78	3.6	0	16	8	0.6	89	0
2021-03-22				1542	2021	3	Spring	22	0	0	7.3	2.19	0	28	12	0.7	92	1
2021-03-23				1543	2021	3	Spring	23	0	0	10.5	4.07	0	29	10	0.7	109	0
2021-03-24				1544	2021	3	Spring	24	0	0	13.15	2.18	0	43	11	0.9	104	0
2021-03-25				1545	2021	3	Spring	25	0	0	14	2.2	0	54	12	1	152	0
2021-03-26				1546	2021	3	Spring	26	0	0	13.63	1.95	4.88	78	17	1.1	126	1
2021-03-27				1547	2021	3	Spring	27	1	0	13.23	1.51	1.03	108	8	1.2	110	1
2021-03-28				1548	2021	3	Spring	28	1	0	14.5	3.2	0.15	60	10	1.1	92	3
2021-03-29				1549	2021	3	Spring	29	0	0	13.08	2.55	0	70	15	1	52	2
2021-03-30				1550	2021	3	Spring	30	0	0	13.82	2.19	0	53	14	0.9	120	2
2021-03-31				1551	2021	3	Spring	31	0	0	11.15	2.44	0.9	41	12	0.9	86	0
2021-04-01				1552	2021	4	Spring	1	0	0	12.81	2.91	0.23	29	8	0.7	105	1
2021-04-02				1553	2021	4	Spring	2	0	0	13.15	2.48	11.03	24	6	0.8	75	1
2021-04-03				1554	2021	4	Spring	3	1	0	9.48	4.98	5.59	17	6	0.8	81	1
2021-04-04				1555	2021	4	Spring	4	1	0	9.49	2.34	0	26	12	0.8	115	1
2021-04-05				1556	2021	4	Spring	5	0	0	11.87	2.26	0	29	14	0.8	107	1
2021-04-06				1557	2021	4	Spring	6	0	0	13.44	0.98	0	40	10	0.8	127	2
2021-04-07				1558	2021	4	Spring	7	0	0	13.45	1.3	0	76	18	1.1	149	1
2021-04-08				1559	2021	4	Spring	8	0	0	14.44	1.2	0	89	20	1.1	173	1
2021-04-09				1560	2021	4	Spring	9	0	0	14.41	1.92	0	70	12	1	160	4
2021-04-10				1561	2021	4	Spring	10	1	0	15.21	2.92	0	40	16	0.9	142	4
2021-04-11				1562	2021	4	Spring	11	1	0	14.5	2.98	0.39	37	10	0.8	90	1
2021-04-12				1563	2021	4	Spring	12	0	0	16.15	1.7	0.3	58	8	0.8	148	1
2021-04-13				1564	2021	4	Spring	13	0	0	12.87	3.48	1.44	30	8	0.8	96	2
2021-04-14				1565	2021	4	Spring	14	0	0	12.56	1.84	0.13	25	10	0.7	116	3
2021-04-15				1566	2021	4	Spring	15	0	0	15.66	4.14	0.66	50	10	0.9	134	2
2021-04-16				1567	2021	4	Spring	16	0	0	14.02	2.68	0	35	8	0.6	93	1
2021-04-17				1568	2021	4	Spring	17	1	0	11.53	2.92	0.01	28	8	0.6	96	0
2021-04-18				1569	2021	4	Spring	18	1	0	13.37	2.59	0.01	27	10	0.7	124	2
2021-04-19				1570	2021	4	Spring	19	0	0	16.07	2.78	0	39	13	0.8	160	0
2021-04-20				1571	2021	4	Spring	20	0	0	14.58	2.96	1.33	53	14	1	118	5
2021-04-21				1572	2021	4	Spring	21	0	0	15.02	3.59	2.71	32	8	0.9	85	2
2021-04-22				1573	2021	4	Spring	22	0	0	15.4	2.48	13.72	42	6	1	94	3
2021-04-23				1574	2021	4	Spring	23	0	0	14.42	3.34	0.53	38	7	0.9	72	3
2021-04-24				1575	2021	4	Spring	24	1	0	14.07	4.3	0.27	25	7	0.8	103	2
2021-04-25				1576	2021	4	Spring	25	1	0	14.7	2.45	2.51	46	8	0.9	74	3
2021-04-26				1577	2021	4	Spring	26	0	0	14.73	1.02	5.76	52	6	0.9	74	3
2021-04-27				1578	2021	4	Spring	27	0	0	16.58	2.54	0.02	51	8	0.8	118	4
2021-04-28				1579	2021	4	Spring	28	0	0	16.03	2.48	0	38	13	0.7	127	2
2021-04-29				1580	2021	4	Spring	29	0	0	15.02	3.84	0	31	11	0.6	110	1
2021-04-30				1581	2021	4	Spring	30	0	0	15.62	3.34	0.74	36	13	0.8	109	3
2021-05-01				1582	2021	5	Spring	1	1	0	14.87	2.98	0	28	13	0.8	129	2
2021-05-02				1583	2021	5	Spring	2	1	0	14.75	2.83	0	14	10	0.6	109	7
2021-05-03				1584	2021	5	Spring	3	0	0	14.99	2.38	5	33	14	0.8	83	4
2021-05-04				1585	2021	5	Spring	4	0	0	17.66	3.41	1.24	48	9	0.9	111	3
2021-05-05				1586	2021	5	Spring	5	0	0	17.98	2.45	0.31	44	12	0.8	142	5
2021-05-06				1587	2021	5	Spring	6	0	0	21.38	4.74	0	38	12	0.8	134	4
2021-05-07				1588	2021	5	Spring	7	0	0	18.18	3.03	0	29	8	0.6	105	4
2021-05-08				1589	2021	5	Spring	8	1	0	20.44	3.75	0	35	11	0.8	160	6
2021-05-09				1590	2021	5	Spring	9	1	0	22.7	3.9	0	51	14	0.9	170	6
2021-05-10				1591	2021	5	Spring	10	0	0	24.25	2.86	0	54	17	1.2	121	3
2021-05-11				1592	2021	5	Spring	11	0	0	20.14	2.79	0	30	9	0.9	152	2
2021-05-12				1593	2021	5	Spring	12	0	0	22.21	1.04	0	50	12	1.1	208	5
2021-05-13				1594	2021	5	Spring	13	0	0	22.51	2.66	1.03	50	12	1.1	93	3
2021-05-14				1595	2021	5	Spring	14	0	0	22.41	1.85	4.32	30	9	1.1	67	6
2021-05-15				1596	2021	5	Spring	15	1	0	21.07	3.51	13.96	31	8	1.2	102	4
2021-05-16				1597	2021	5	Spring	16	1	0	15.02	4.58	7.01	12	7	0.7	76	2
2021-05-17				1598	2021	5	Spring	17	0	0	18.73	1.55	0	19	11	0.8	134	5
2021-05-18				1599	2021	5	Spring	18	0	0	20	2.32	0	25	10	0.8	140	9
2021-05-19				1600	2021	5	Spring	19	0	0	19.89	2.52	0.01	51	11	1	154	9
2021-05-20				1601	2021	5	Spring	20	0	0	20.8	2.7	0.03	29	10	0.8	146	4
2021-05-21				1602	2021	5	Spring	21	0	0	22.88	2.8	0.01	32	10	0.8	160	5
2021-05-22				1603	2021	5	Spring	22	1	0	25.21	3.14	0.11	42	12	1.1	194	7
2021-05-23				1604	2021	5	Spring	23	1	0	20.87	2.87	1.82	39	10	0.8	123	5
2021-05-24				1605	2021	5	Spring	24	0	0	22.72	3.14	0.13	45	11	0.8	152	6
2021-05-25				1606	2021	5	Spring	25	0	0	21.75	3.27	0	34	10	0.6	136	8
2021-05-26				1607	2021	5	Spring	26	0	0	22.69	4.05	3.23	23	8	0.7	121	7
2021-05-27				1608	2021	5	Spring	27	0	0	25.44	4	0	35	11	0.8	163	5
2021-05-28				1609	2021	5	Spring	28	0	0	23.12	3.27	0	15	9	0.6	127	4
2021-05-29				1610	2021	5	Spring	29	1	0	25.48	3.98	0	33	12	0.8	194	2
2021-05-30				1611	2021	5	Spring	30	1	0	24.62	1.97	0	51	13	1.1	238	5
2021-05-31				1612	2021	5	Spring	31	0	0	27.44	3.16	1.06	46	10	1	174	2
2021-06-01				1613	2021	6	Summer	1	0	0	24.43	3.43	1.59	51	10	1.1	219	3
2021-06-02				1614	2021	6	Summer	2	0	0	26.88	2.68	2.74	31	8	0.7	187	7
2021-06-03				1615	2021	6	Summer	3	0	0	22.28	1.91	16.7	29	7	0.8	108	10
2021-06-04				1616	2021	6	Summer	4	0	0	23.51	3.01	0	27	11	0.6	167	9
2021-06-05				1617	2021	6	Summer	5	1	0	24.37	2.28	0	28	13	0.6	258	9
2021-06-06				1618	2021	6	Summer	6	1	0	27.83	3.66	0.05	26	12	0.7	207	3
2021-06-07				1619	2021	6	Summer	7	0	0	27.3	3.2	0	30	10	0.7	190	10
2021-06-08				1620	2021	6	Summer	8	0	0	27.31	2.33	0	27	12	0.6	215	14
2021-06-09				1621	2021	6	Summer	9	0	0	27.35	1.78	0.3	34	10	0.7	147	3
2021-06-10				1622	2021	6	Summer	10	0	0	26.11	1.86	1.84	49	8	1	167	6
2021-06-11				1623	2021	6	Summer	11	0	0	27.65	1.15	0	36	8	0.9	207	5
2021-06-12				1624	2021	6	Summer	12	1	0	28.55	3.05	0.62	38	11	0.9	234	8
2021-06-13				1625	2021	6	Summer	13	1	0	28.06	2.98	3.49	28	9	0.8	153	10
2021-06-14				1626	2021	6	Summer	14	0	0	26.24	2.2	61.57	19	6	0.9	50	6
2021-06-15				1627	2021	6	Summer	15	0	0	26.2	2.75	9.26	19	6	1	115	6
2021-06-16				1628	2021	6	Summer	16	0	0	24.66	1.91	4.79	12	6	0.6	118	11
2021-06-17				1629	2021	6	Summer	17	0	0	24.01	1.97	18.01	17	6	0.7	80	12
2021-06-18				1630	2021	6	Summer	18	0	0	25.04	1.66	0.01	22	10	0.8	149	3
2021-06-19				1631	2021	6	Summer	19	1	0	25.49	2.23	0.03	19	10	0.6	174	9
2021-06-20				1632	2021	6	Summer	20	1	0	26.85	2.56	0	16	10	0.6	197	6
2021-06-21				1633	2021	6	Summer	21	0	0	27.58	1.87	0	24	12	0.8	219	9
2021-06-22				1634	2021	6	Summer	22	0	0	29.09	1.11	0	38	11	0.8	238	7
2021-06-23				1635	2021	6	Summer	23	0	0	29.05	2.26	0	34	12	0.8	272	6
2021-06-24				1636	2021	6	Summer	24	0	0	28.12	3.25	0	26	14	0.8	241	9
2021-06-25				1637	2021	6	Summer	25	0	0	26.77	3.28	0.61	37	12	0.9	134	9
2021-06-26				1638	2021	6	Summer	26	1	0	27.6	2.46	0.53	32	9	0.8	174	6
2021-06-27				1639	2021	6	Summer	27	1	0	28.61	2.15	2.56	44	9	0.8	195	2
2021-06-28				1640	2021	6	Summer	28	0	0	28.9	2	1.93	41	10	0.8	199	1
2021-06-29				1641	2021	6	Summer	29	0	0	26.84	2.39	12.04	22	8	0.7	146	2
2021-06-30				1642	2021	6	Summer	30	0	0	28.65	2.35	19.16	36	8	0.8	176	2
2021-07-01				1643	2021	7	Summer	1	0	0	26.44	1.79	6.21	19	8	0.7	155	5
2021-07-02				1644	2021	7	Summer	2	0	0	27.3	2.69	1.27	25	7	0.8	143	9
2021-07-03				1645	2021	7	Summer	3	1	0	25.97	2.81	12.98	16	7	0.6	156	4
2021-07-04				1646	2021	7	Summer	4	1	0	27.52	2.45	0.22	32	8	0.8	166	4
2021-07-05				1647	2021	7	Summer	5	0	0	27.3	2.12	1.27	31	7	0.7	168	3
2021-07-06				1648	2021	7	Summer	6	0	0	26.01	1.69	0.04	33	8	0.8	149	5
2021-07-07				1649	2021	7	Summer	7	0	0	27.18	1.57	1.21	36	9	1	142	3
2021-07-08				1650	2021	7	Summer	8	0	0	27.96	1.05	1.28	15	7	0.7	139	9
2021-07-09				1651	2021	7	Summer	9	0	0	29.51	2.66	15.28	22	7	0.7	140	4
2021-07-10				1652	2021	7	Summer	10	1	0	29.69	2.7	18.46	17	7	0.6	125	5
2021-07-11				1653	2021	7	Summer	11	1	0	28.43	4.2	7.96	25	6	0.7	116	5
2021-07-12				1654	2021	7	Summer	12	0	0	29.02	5.55	22.96	19	6	0.6	103	5
2021-07-13				1655	2021	7	Summer	13	0	0	29.4	3.95	6.65	17	6	0.6	105	5
2021-07-14				1656	2021	7	Summer	14	0	0	29.04	2.54	8.45	23	6	0.6	138	5
2021-07-15				1657	2021	7	Summer	15	0	0	27.55	2.05	16.32	18	6	0.5	131	8
2021-07-16				1658	2021	7	Summer	16	0	0	27.76	1.73	14.36	10	7	0.6	77	4
2021-07-17				1659	2021	7	Summer	17	1	0	26.08	3.83	7.41	11	6	0.6	79	5
2021-07-18				1660	2021	7	Summer	18	1	0	26.94	3.17	0.84	16	7	0.5	96	8
2021-07-19				1661	2021	7	Summer	19	0	0	26.97	2.76	0.01	18	8	0.6	132	6
2021-07-20				1662	2021	7	Summer	20	0	0	26.51	2.74	1.58	16	7	0.6	80	3
2021-07-21				1663	2021	7	Summer	21	0	0	27.08	3.29	4.41	12	7	0.5	65	9
2021-07-22				1664	2021	7	Summer	22	0	0	26.56	2.54	0.13	18	8	0.6	116	3
2021-07-23				1665	2021	7	Summer	23	0	0	27.05	1.37	0.41	18	8	0.6	90	7
2021-07-24				1666	2021	7	Summer	24	1	0	27.75	2.01	0.11	14	8	0.6	138	3
2021-07-25				1667	2021	7	Summer	25	1	0	28.05	1.7	0.01	14	9	0.7	148	9
2021-07-26				1668	2021	7	Summer	26	0	0	28.57	2.76	0.04	10	8	0.6	92	12
2021-07-27				1669	2021	7	Summer	27	0	0	26.76	3.3	24.64	6	8	0.5	56	11
2021-07-28				1670	2021	7	Summer	28	0	0	24.7	5.9	64.31	9	7	0.6	54	12
2021-07-29				1671	2021	7	Summer	29	0	0	25.01	4.37	72.03	4	6	0.5	64	4
2021-07-30				1672	2021	7	Summer	30	0	0	25.16	3.09	1.01	16	7	0.6	126	4
2021-07-31				1673	2021	7	Summer	31	1	0	28.49	2.12	2.06	29	6	0.8	135	10
2021-08-01				1674	2021	8	Summer	1	1	0	28.29	2.2	4.32	24	6	0.7	136	4
2021-08-02				1675	2021	8	Summer	2	0	0	26.09	2.63	0.09	24	9	0.9	172	4
2021-08-03				1676	2021	8	Summer	3	0	0	26.77	1.55	0	29	6	0.7	173	3
2021-08-04				1677	2021	8	Summer	4	0	0	27.73	1.58	0	19	7	0.6	126	7
2021-08-05				1678	2021	8	Summer	5	0	0	27.84	1.38	6.31	13	6	0.6	86	3
2021-08-06				1679	2021	8	Summer	6	0	0	27.92	1.38	0.19	18	7	0.6	147	10
2021-08-07				1680	2021	8	Summer	7	1	0	27.19	1.19	7.28	21	9	0.7	144	4
2021-08-08				1681	2021	8	Summer	8	1	0	27.04	1.17	0.14	44	7	1	206	6
2021-08-09				1682	2021	8	Summer	9	0	0	27.3	1.42	0.41	52	6	0.9	170	3
2021-08-10				1683	2021	8	Summer	10	0	0	27.02	1.41	0.02	32	5	0.7	147	9
2021-08-11				1684	2021	8	Summer	11	0	0	27.26	1.35	1.8	48	6	0.8	196	2
2021-08-12				1685	2021	8	Summer	12	0	0	26.79	1.77	2.5	36	6	0.8	150	3
2021-08-13				1686	2021	8	Summer	13	0	0	24.3	1.29	2.19	40	5	0.8	128	5
2021-08-14				1687	2021	8	Summer	14	1	0	24.41	1.57	0.04	29	6	0.8	157	6
2021-08-15				1688	2021	8	Summer	15	1	0	24.91	1.67	0	28	9	0.7	174	6
2021-08-16				1689	2021	8	Summer	16	0	0	25.9	1.3	1.06	24	6	0.6	154	4
2021-08-17				1690	2021	8	Summer	17	0	0	26.18	1.17	1.46	30	6	0.7	168	6
2021-08-18				1691	2021	8	Summer	18	0	0	25.08	1.8	1.55	31	6	0.7	156	10
2021-08-19				1692	2021	8	Summer	19	0	0	25.47	1.92	6.57	28	6	0.7	170	2
2021-08-20				1693	2021	8	Summer	20	0	0	24.76	2.35	19.96	18	4	0.8	114	4
2021-08-21				1694	2021	8	Summer	21	1	0	24.94	1.23	0.09	28	6	0.9	179	4
2021-08-22				1695	2021	8	Summer	22	1	0	25.35	2.27	5.28	32	6	0.9	129	3
2021-08-23				1696	2021	8	Summer	23	0	0	24.96	1.21	35.51	14	4	0.6	98	3
2021-08-24				1697	2021	8	Summer	24	0	0	24.4	2.09	0.01	29	8	0.8	164	3
2021-08-25				1698	2021	8	Summer	25	0	0	23.64	2.33	0.01	25	8	0.7	154	5
2021-08-26				1699	2021	8	Summer	26	0	0	22.4	2.09	2.41	20	6	0.6	75	2
2021-08-27				1700	2021	8	Summer	27	0	0	20.84	1.71	1.24	14	4	0.5	104	6
2021-08-28				1701	2021	8	Summer	28	1	0	21.33	0.85	14.27	24	5	0.6	82	1
2021-08-29				1702	2021	8	Summer	29	1	0	23.23	1.12	35.58	12	3	0.6	58	1
2021-08-30				1703	2021	8	Summer	30	0	0	23.71	2.2	53.89	12	3	0.7	46	2
2021-08-31				1704	2021	8	Summer	31	0	0	23.94	2.35	22.18	13	3	0.8	57	3
2021-09-01				1705	2021	9	Autumn	1	0	0	21.21	1.88	24.92	12	3	0.6	56	1
2021-09-02				1706	2021	9	Autumn	2	0	0	23.63	0.91	2.63	18	3	0.6	81	3
2021-09-03				1707	2021	9	Autumn	3	0	0	24.2	1.42	0.12	28	4	1	122	3
2021-09-04				1708	2021	9	Autumn	4	1	0	21.83	4.05	49.57	19	4	0.6	74	1
2021-09-05				1709	2021	9	Autumn	5	1	0	22	3.38	3.86	8	4	0.6	75	2
2021-09-06				1710	2021	9	Autumn	6	0	0	21.4	3.45	4.35	10	6	0.6	83	1
2021-09-07				1711	2021	9	Autumn	7	0	0	21.07	1.6	0.25	14	6	0.5	108	2
2021-09-08				1712	2021	9	Autumn	8	0	0	21.38	2.3	0.04	15	8	0.5	142	0
2021-09-09				1713	2021	9	Autumn	9	0	0	23.42	2.77	0	22	8	0.6	134	0
2021-09-10				1714	2021	9	Autumn	10	0	0	24.51	2.54	0	32	8	0.8	155	1
2021-09-11				1715	2021	9	Autumn	11	1	0	25.47	2.09	0	38	8	0.8	167	2
2021-09-12				1716	2021	9	Autumn	12	1	0	25.48	1.95	0	42	8	0.8	177	1
2021-09-13				1717	2021	9	Autumn	13	0	0	23.94	1.8	0	22	7	0.6	154	4
2021-09-14				1718	2021	9	Autumn	14	0	0	23	2.35	0	32	7	0.7	162	4
2021-09-15				1719	2021	9	Autumn	15	0	0	22.23	1.41	0	24	9	0.8	148	6
2021-09-16				1720	2021	9	Autumn	16	0	0	23.15	1.34	0	33	10	0.8	192	9
2021-09-17				1721	2021	9	Autumn	17	0	0	22.55	1.87	0.14	36	8	0.9	136	4
2021-09-18				1722	2021	9	Autumn	18	1	0	21.96	2.1	7.84	26	6	0.8	51	3
2021-09-19				1723	2021	9	Autumn	19	1	0	23.12	3.83	25.7	21	5	0.6	69	9
2021-09-20				1724	2021	9	Autumn	20	0	0	19.73	3.94	29.11	5	5	0.6	77	9
2021-09-21				1725	2021	9	Autumn	21	0	0	22.35	2.18	1.35	22	8	0.6	142	7
2021-09-22				1726	2021	9	Autumn	22	0	0	23.5	1.57	0.01	32	10	0.7	175	10
2021-09-23				1727	2021	9	Autumn	23	0	0	24.11	3.59	2.11	33	9	0.8	168	8
2021-09-24				1728	2021	9	Autumn	24	0	0	23.23	4.05	4.42	22	7	0.6	138	2
2021-09-25				1729	2021	9	Autumn	25	1	0	21.69	4.16	32.08	7	5	0.4	85	4
2021-09-26				1730	2021	9	Autumn	26	1	0	22	2.39	10.75	9	5	0.5	70	6
2021-09-27				1731	2021	9	Autumn	27	0	0	21.65	2.3	0.37	16	6	0.6	65	4
2021-09-28				1732	2021	9	Autumn	28	0	0	19.5	1.54	3.52	21	7	0.7	51	10
2021-09-29				1733	2021	9	Autumn	29	0	0	21.62	0.67	0.14	17	7	0.7	119	7
2021-09-30				1734	2021	9	Autumn	30	0	0	21.13	2.52	0.02	20	8	0.6	136	10
2021-10-01				1735	2021	10	Autumn	1	0	0	21.33	1.35	0	39	10	0.8	165	7
2021-10-02				1736	2021	10	Autumn	2	1	0	23	2.6	0.02	52	10	0.9	172	16
2021-10-03				1737	2021	10	Autumn	3	1	0	24.87	3.66	2.69	42	11	0.8	158	8
2021-10-04				1738	2021	10	Autumn	4	0	0	24.27	3.36	16.69	20	6	0.8	67	10
2021-10-05				1739	2021	10	Autumn	5	0	0	17.47	4.11	10.69	8	5	0.5	46	5
2021-10-06				1740	2021	10	Autumn	6	0	0	15.92	2.71	4.47	12	6	0.6	43	14
2021-10-07				1741	2021	10	Autumn	7	0	0	15	2.96	5.13	12	5	0.7	33	12
2021-10-08				1742	2021	10	Autumn	8	0	0	16.5	1.6	3.13	36	6	0.9	38	8
2021-10-09				1743	2021	10	Autumn	9	1	0	18.94	1.87	1.08	47	7	0.9	62	6
2021-10-10				1744	2021	10	Autumn	10	1	0	14.83	4.03	2.2	20	7	0.6	60	4
2021-10-11				1745	2021	10	Autumn	11	0	0	12.35	2.52	0	10	9	0.4	83	3
2021-10-12				1746	2021	10	Autumn	12	0	0	13.72	2.18	0	20	12	0.6	108	8
2021-10-13				1747	2021	10	Autumn	13	0	0	15.86	1.4	0	45	11	0.9	144	11
2021-10-14				1748	2021	10	Autumn	14	0	0	17.68	1.86	4.35	64	11	0.9	136	6
2021-10-15				1749	2021	10	Autumn	15	0	0	15.74	2.14	4.83	59	6	0.9	54	8
2021-10-16				1750	2021	10	Autumn	16	1	0	10.19	4.45	0	14	7	0.4	67	8
2021-10-17				1751	2021	10	Autumn	17	1	0	6.74	1.33	0.01	15	10	0.5	74	9
2021-10-18				1752	2021	10	Autumn	18	0	0	10.54	2.48	0	28	8	0.6	94	8
2021-10-19				1753	2021	10	Autumn	19	0	0	10.35	2.54	0	43	8	0.7	66	14
2021-10-20				1754	2021	10	Autumn	20	0	0	10.1	1.18	0.01	38	10	0.6	43	10
2021-10-21				1755	2021	10	Autumn	21	0	0	11.52	2.17	0.03	86	6	0.7	60	11
2021-10-22				1756	2021	10	Autumn	22	0	0	10.61	1.59	0	80	11	0.8	81	5
2021-10-23				1757	2021	10	Autumn	23	1	0	11.8	1.51	0	40	9	0.8	106	7
2021-10-24				1758	2021	10	Autumn	24	1	0	11.85	1.21	0	74	12	0.9	128	14
2021-10-25				1759	2021	10	Autumn	25	0	0	11.48	1.61	0	90	10	0.7	152	8
2021-10-26				1760	2021	10	Autumn	26	0	0	12.41	1.18	0	98	12	0.9	134	6
2021-10-27				1761	2021	10	Autumn	27	0	0	13.54	1.27	0	94	12	1	124	9
2021-10-28				1762	2021	10	Autumn	28	0	0	14.33	1.66	0	84	12	0.9	124	12
2021-10-29				1763	2021	10	Autumn	29	0	0	13.46	1.66	0	74	13	0.7	117	16
2021-10-30				1764	2021	10	Autumn	30	1	0	14.84	1.55	0.02	102	12	0.8	138	12
2021-10-31				1765	2021	10	Autumn	31	1	0	14.35	1.18	0.44	134	14	1	108	10
2021-11-01				1766	2021	11	Autumn	1	0	0	11.57	2.24	0.06	99	6	0.8	95	20
2021-11-02				1767	2021	11	Autumn	2	0	0	11.08	2.18	0.28	58	12	0.7	72	19
2021-11-03				1768	2021	11	Autumn	3	0	0	12.71	1.42	0.13	118	10	1.1	102	18
2021-11-04				1769	2021	11	Autumn	4	0	0	12.77	1.8	0	138	12	1	120	12
2021-11-05				1770	2021	11	Autumn	5	0	0	14.96	2.42	1.97	70	9	0.8	94	18
2021-11-06				1771	2021	11	Autumn	6	1	0	16.01	2.19	1.88	18	5	0.6	57	10
2021-11-07				1772	2021	11	Autumn	7	1	0	0.84	5.77	36.14	9	5	0.3	58	17
2021-11-08				1773	2021	11	Autumn	8	0	0	-6.33	2.38	0	16	8	0.4	70	19
2021-11-09				1774	2021	11	Autumn	9	0	0	-1.64	2.05	0	26	14	0.6	63	15
2021-11-10				1775	2021	11	Autumn	10	0	0	3.08	2.33	0	28	14	0.5	65	10
2021-11-11				1776	2021	11	Autumn	11	0	0	4.59	2.27	0.14	20	14	0.4	70	6
2021-11-12				1777	2021	11	Autumn	12	0	0	7.15	1.22	0	39	12	0.6	61	10
2021-11-13				1778	2021	11	Autumn	13	1	0	6.78	1.79	2.39	71	16	0.8	60	21
2021-11-14				1779	2021	11	Autumn	14	1	0	10.5	1.2	0.64	81	16	0.8	86	7
2021-11-15				1780	2021	11	Autumn	15	0	0	10.26	1.38	0	99	22	1	72	17
2021-11-16				1781	2021	11	Autumn	16	0	0	9.26	1.09	0	142	21	1.4	65	10
2021-11-17				1782	2021	11	Autumn	17	0	0	9.66	2.14	0	136	14	1.1	136	16
2021-11-18				1783	2021	11	Autumn	18	0	0	10.37	2.91	0.02	124	13	0.8	142	14
2021-11-19				1784	2021	11	Autumn	19	0	0	11.77	1.59	0	108	14	1	127	7
2021-11-20				1785	2021	11	Autumn	20	1	0	12.34	0.98	5.22	104	11	1.1	44	8
2021-11-21				1786	2021	11	Autumn	21	1	0	5.81	4.67	2.56	33	6	0.6	54	13
2021-11-22				1787	2021	11	Autumn	22	0	0	-0.33	3.17	0	11	8	0.3	50	4
2021-11-23				1788	2021	11	Autumn	23	0	0	1.55	1.84	0	33	12	0.5	49	17
2021-11-24				1789	2021	11	Autumn	24	0	0	4.59	1.74	0	58	14	0.8	56	16
2021-11-25				1790	2021	11	Autumn	25	0	0	7.99	1.03	0	82	13	1	47	10
2021-11-26				1791	2021	11	Autumn	26	0	0	7.05	1.63	0	90	16	1	54	10
2021-11-27				1792	2021	11	Autumn	27	1	0	6.06	2.11	0	98	20	1	104	10
2021-11-28				1793	2021	11	Autumn	28	1	0	7.87	2.67	0.01	32	10	0.6	67	8
2021-11-29				1794	2021	11	Autumn	29	0	0	6.94	2.52	6.12	60	9	0.9	33	11
2021-11-30				1795	2021	11	Autumn	30	0	0	1.27	4.23	0.27	28	6	0.4	61	13
2021-12-01				1796	2021	12	Winter	1	0	0	1.35	1.33	0.32	22	12	0.6	52	8
2021-12-02				1797	2021	12	Winter	2	0	0	1.46	2.18	0	41	13	0.6	43	11
2021-12-03				1798	2021	12	Winter	3	0	0	4.46	1.46	0	43	14	0.8	47	7
2021-12-04				1799	2021	12	Winter	4	1	0	4.68	1.62	0	56	15	0.8	60	6
2021-12-05				1800	2021	12	Winter	5	1	0	4.19	2.47	0	71	20	0.9	74	7
2021-12-06				1801	2021	12	Winter	6	0	0	3.6	2.99	0	89	17	1	54	20
2021-12-07				1802	2021	12	Winter	7	0	0	3.13	1.98	0	24	11	0.7	50	6
2021-12-08				1803	2021	12	Winter	8	0	0	4.05	1.77	0	37	14	0.8	65	9
2021-12-09				1804	2021	12	Winter	9	0	0	6.23	1.59	0	74	14	0.9	81	13
2021-12-10				1805	2021	12	Winter	10	0	0	7.02	1.06	0.02	136	12	1.2	66	7
2021-12-11				1806	2021	12	Winter	11	1	0	7.5	0.88	0.43	110	12	1.2	34	7
2021-12-12				1807	2021	12	Winter	12	1	0	1.72	3.92	0.04	39	9	0.6	60	4
2021-12-13				1808	2021	12	Winter	13	0	0	0.13	2.18	0	36	13	0.8	48	13
2021-12-14				1809	2021	12	Winter	14	0	0	3.37	2.67	0	92	9	1	72	5
2021-12-15				1810	2021	12	Winter	15	0	0	5.87	1.44	0	122	10	1.3	78	10
2021-12-16				1811	2021	12	Winter	16	0	0	3.26	2.76	0	109	12	1.2	47	6
2021-12-17				1812	2021	12	Winter	17	0	0	-3.14	3.3	0	12	11	0.6	59	6
2021-12-18				1813	2021	12	Winter	18	1	0	-0.74	2.41	0	31	12	0.6	47	8
2021-12-19				1814	2021	12	Winter	19	1	0	1.01	1.88	0	54	14	0.7	54	8
2021-12-20				1815	2021	12	Winter	20	0	0	2.94	2	0	57	12	0.7	48	9
2021-12-21				1816	2021	12	Winter	21	0	0	4.83	1.66	0	96	20	1.2	69	6
2021-12-22				1817	2021	12	Winter	22	0	0	3.17	1.83	0	116	20	1.3	60	6
2021-12-23				1818	2021	12	Winter	23	0	0	3.11	2.03	0.07	148	10	1.5	25	4
2021-12-24				1819	2021	12	Winter	24	0	0	-1.94	5.56	1.75	33	6	0.6	56	5
2021-12-25				1820	2021	12	Winter	25	1	0	-5.95	4.38	0	14	8	0.4	51	6
2021-12-26				1821	2021	12	Winter	26	1	0	-7.22	2.41	0	26	12	0.5	57	7
2021-12-27				1822	2021	12	Winter	27	0	0	-4.36	1.81	0	60	12	0.8	49	4
2021-12-28				1823	2021	12	Winter	28	0	0	-1.81	2.58	0	62	13	0.8	64	2
2021-12-29				1824	2021	12	Winter	29	0	0	-1.54	2.44	0	62	18	1	44	3
2021-12-30				1825	2021	12	Winter	30	0	0	-0.49	1.62	0	67	22	1.2	36	4
2021-12-31				1826	2021	12	Winter	31	0	0	0.37	1.95	0	88	25	1.4	38	2
2022-01-01				1827	2022	1	Winter	1	1	0	1.08	2.8	0	80	18	1.1	57	5
2022-01-02				1828	2022	1	Winter	2	1	0	0.12	2.25	0	69	19	1.1	61	3
2022-01-03				1829	2022	1	Winter	3	0	0	-0.05	1.88	0	98	17	1.1	62	5
2022-01-04				1830	2022	1	Winter	4	0	0	0.15	2.38	1.39	137	16	1.5	35	3
2022-01-05				1831	2022	1	Winter	5	0	0	0.76	1.83	4.03	44	7	0.7	50	6
2022-01-06				1832	2022	1	Winter	6	0	0	1.17	1.2	0.16	104	12	1.2	47	2
2022-01-07				1833	2022	1	Winter	7	0	0	1.69	1.04	0	101	11	1.1	56	5
2022-01-08				1834	2022	1	Winter	8	1	0	1.5	1.36	0	114	10	1.1	69	9
2022-01-09				1835	2022	1	Winter	9	1	0	2.64	0.98	0	140	11	1.3	70	0
2022-01-10				1836	2022	1	Winter	10	0	0	0.27	1.92	0.63	161	10	1.5	34	2
2022-01-11				1837	2022	1	Winter	11	0	0	-0.99	1.43	0	86	10	1.1	64	4
2022-01-12				1838	2022	1	Winter	12	0	0	-0.77	3.1	0	142	11	1.4	31	2
2022-01-13				1839	2022	1	Winter	13	0	0	-2.55	2.23	0	61	12	0.9	55	5
2022-01-14				1840	2022	1	Winter	14	0	0	-2.31	2.92	0	52	13	0.9	48	5
2022-01-15				1841	2022	1	Winter	15	1	0	-0.45	2.32	0	85	12	1.1	49	6
2022-01-16				1842	2022	1	Winter	16	1	0	0.03	1.62	0	65	17	1.1	59	6
2022-01-17				1843	2022	1	Winter	17	0	0	0.08	1.86	0	109	20	1.3	72	5
2022-01-18				1844	2022	1	Winter	18	0	0	0.36	2.57	0	110	15	1.3	54	6
2022-01-19				1845	2022	1	Winter	19	0	0	0.95	2.47	0	125	12	1.2	92	7
2022-01-20				1846	2022	1	Winter	20	0	0	-2.43	2.45	0	56	9	0.8	32	1
2022-01-21				1847	2022	1	Winter	21	0	0	-0.94	2.01	0.05	47	11	0.9	62	2
2022-01-22				1848	2022	1	Winter	22	1	0	0.78	2.55	5.78	55	7	0.9	37	1
2022-01-23				1849	2022	1	Winter	23	1	0	0.69	3.52	0.46	94	8	1.2	49	1
2022-01-24				1850	2022	1	Winter	24	0	0	-0.96	1.96	0.14	64	11	0.9	67	1
2022-01-25				1851	2022	1	Winter	25	0	0	0.09	1.14	0	104	11	1.3	76	1
2022-01-26				1852	2022	1	Winter	26	0	1	-0.05	2.3	0.02	106	12	1.4	78	2
2022-01-27				1853	2022	1	Winter	27	0	1	0.33	2.38	0	60	14	1.1	72	0
2022-01-28				1854	2022	1	Winter	28	0	1	-0.24	1.26	0	78	16	1.1	68	1
2022-01-29				1855	2022	1	Winter	29	1	1	0.6	1.15	0	94	19	1.4	81	1
2022-01-30				1856	2022	1	Winter	30	1	1	0.63	1.25	0	100	13	1.2	97	0
2022-01-31				1857	2022	1	Winter	31	0	1	-0.24	2.79	0	56	9	0.8	86	1
2022-02-01				1858	2022	2	Winter	1	0	1	-1.16	2.06	0	28	14	0.6	86	2
2022-02-02				1859	2022	2	Winter	2	0	1	1.21	1.41	0	34	16	0.8	95	2
2022-02-03				1860	2022	2	Winter	3	0	1	1.4	1.14	0	57	15	0.9	111	2
2022-02-04				1861	2022	2	Winter	4	0	1	-0.47	2.52	0.16	57	14	0.8	93	1
2022-02-05				1862	2022	2	Winter	5	1	1	-1.31	1.77	0	19	13	0.6	87	0
2022-02-06				1863	2022	2	Winter	6	1	1	0.89	0.85	0	30	15	0.7	90	2
2022-02-07				1864	2022	2	Winter	7	0	1	1.08	1.13	0	39	15	0.7	87	0
2022-02-08				1865	2022	2	Winter	8	0	1	1.17	1.48	0	53	10	0.7	80	1
2022-02-09				1866	2022	2	Winter	9	0	1	1.44	1.91	0	51	10	0.7	94	2
2022-02-10				1867	2022	2	Winter	10	0	1	2.06	1.82	0	45	7	0.7	75	3
2022-02-11				1868	2022	2	Winter	11	0	1	3.37	1.49	0	58	10	0.8	95	0
2022-02-12				1869	2022	2	Winter	12	1	1	3.76	1.04	0	70	10	0.8	116	4
2022-02-13				1870	2022	2	Winter	13	1	1	4.31	1.55	0.01	108	11	1	85	1
2022-02-14				1871	2022	2	Winter	14	0	1	1.05	3.48	0.18	67	8	0.7	66	0
2022-02-15				1872	2022	2	Winter	15	0	1	-1.28	1.98	0.08	52	10	0.7	65	1
2022-02-16				1873	2022	2	Winter	16	0	0	-0.47	2.63	0.08	86	9	0.8	67	0
2022-02-17				1874	2022	2	Winter	17	0	0	-1.79	2.9	0	28	10	0.5	80	1
2022-02-18				1875	2022	2	Winter	18	0	0	-0.96	1.24	0.65	25	8	0.5	72	0
2022-02-19				1876	2022	2	Winter	19	1	0	-1.65	3.6	0	27	9	0.5	78	0
2022-02-20				1877	2022	2	Winter	20	1	0	-0.22	1.87	0	42	10	0.6	95	0
2022-02-21				1878	2022	2	Winter	21	0	0	0.68	1.88	0	45	11	0.6	81	1
2022-02-22				1879	2022	2	Winter	22	0	0	-0.11	2.92	0	35	14	0.7	78	0
2022-02-23				1880	2022	2	Winter	23	0	0	0.68	1.43	0	32	13	0.7	86	0
2022-02-24				1881	2022	2	Winter	24	0	0	1.87	2.58	0	63	14	0.8	117	0
2022-02-25				1882	2022	2	Winter	25	0	0	4.86	3.23	0	67	11	0.8	131	1
2022-02-26				1883	2022	2	Winter	26	1	0	5.25	3.66	0	38	10	0.6	91	0
2022-02-27				1884	2022	2	Winter	27	1	0	5.6	3.18	0	36	14	0.7	110	1
2022-02-28				1885	2022	2	Winter	28	0	0	7.93	2.46	0	83	18	1	112	0
2022-03-01				1886	2022	3	Spring	1	0	0	4.68	3.78	0	28	10	0.5	87	1
2022-03-02				1887	2022	3	Spring	2	0	0	6.4	2.3	0	32	12	0.6	100	0
2022-03-03				1888	2022	3	Spring	3	0	0	8.23	2.19	0	59	16	0.8	101	0
2022-03-04				1889	2022	3	Spring	4	0	0	8.67	3.57	0	32	11	0.6	105	1
2022-03-05				1890	2022	3	Spring	5	1	0	5.9	2.38	0	22	10	0.5	88	0
2022-03-06				1891	2022	3	Spring	6	1	0	5.4	3.17	0	28	14	0.6	89	1
2022-03-07				1892	2022	3	Spring	7	0	0	8.7	2.88	0	44	12	0.7	98	0
2022-03-08				1893	2022	3	Spring	8	0	0	9.69	2.35	0	39	12	0.8	123	2
2022-03-09				1894	2022	3	Spring	9	0	0	12.36	2.3	0	45	14	0.8	155	0
2022-03-10				1895	2022	3	Spring	10	0	0	11.71	2.36	0	72	17	0.9	153	2
2022-03-11				1896	2022	3	Spring	11	0	0	13.61	2.55	0	69	15	1	180	1
2022-03-12				1897	2022	3	Spring	12	1	0	11.05	2.59	2.04	72	10	1	103	0
2022-03-13				1898	2022	3	Spring	13	1	0	13.08	1.98	1.46	117	10	1.3	110	0
2022-03-14				1899	2022	3	Spring	14	0	0	12.62	2.18	0.99	89	8	1.1	103	1
2022-03-15				1900	2022	3	Spring	15	0	0	11.68	2.84	0.07	45	11	0.8	105	1
2022-03-16				1901	2022	3	Spring	16	0	0	12.03	3.29	2.66	30	18	1.2	78	1
2022-03-17				1902	2022	3	Spring	17	0	0	4.63	5.12	1.09	20	9	0.7	69	0
2022-03-18				1903	2022	3	Spring	18	0	0	5.12	1.5	0.25	36	10	0.7	66	2
2022-03-19				1904	2022	3	Spring	19	1	0	3.28	3.4	0.01	47	8	0.8	58	2
2022-03-20				1905	2022	3	Spring	20	1	0	2.2	1.88	0	55	11	1	80	0
2022-03-21				1906	2022	3	Spring	21	0	0	4.79	1.44	0	60	13	1.1	59	2
2022-03-22				1907	2022	3	Spring	22	0	0	8.09	1.52	0	66	15	1	115	2
2022-03-23				1908	2022	3	Spring	23	0	0	8.65	3.61	0	31	9	0.5	103	2
2022-03-24				1909	2022	3	Spring	24	0	0	10.36	3.65	0.06	35	9	0.7	104	2
2022-03-25				1910	2022	3	Spring	25	0	0	11.32	4.05	20.52	67	8	1	76	0
2022-03-26				1911	2022	3	Spring	26	1	0	8.98	2.64	0.01	42	10	0.7	89	1
2022-03-27				1912	2022	3	Spring	27	1	0	8.68	3.24	0	14	8	0.5	97	1
2022-03-28				1913	2022	3	Spring	28	0	0	9.57	3.83	0	19	11	0.6	115	3
2022-03-29				1914	2022	3	Spring	29	0	0	12.26	3.79	1.39	34	11	0.7	128	4
2022-03-30				1915	2022	3	Spring	30	0	0	13.22	3.09	0.43	69	10	1	73	1
2022-03-31				1916	2022	3	Spring	31	0	0	8.98	2.5	0.2	32	9	0.8	102	0
2022-04-01				1917	2022	4	Spring	1	0	0	9.3	2.18	0	24	9	0.6	120	3
2022-04-02				1918	2022	4	Spring	2	1	0	9.55	1.96	0.27	44	10	0.7	126	1
2022-04-03				1919	2022	4	Spring	3	1	0	11.27	1.79	0	54	11	0.8	142	1
2022-04-04				1920	2022	4	Spring	4	0	0	12.76	3.75	0	38	11	0.7	153	3
2022-04-05				1921	2022	4	Spring	5	0	0	16.13	2.71	0	43	13	0.9	146	0
2022-04-06				1922	2022	4	Spring	6	0	0	15.4	1.79	0.01	63	15	1.1	124	2
2022-04-07				1923	2022	4	Spring	7	0	0	14.37	0.99	0	60	12	1	146	1
2022-04-08				1924	2022	4	Spring	8	0	0	18.27	3.36	0	67	11	1.1	155	0
2022-04-09				1925	2022	4	Spring	9	1	0	19.99	4.02	0	28	11	0.8	156	2
2022-04-10				1926	2022	4	Spring	10	1	0	21.62	3.47	0	32	14	0.8	170	2
2022-04-11				1927	2022	4	Spring	11	0	0	22.78	3.41	1	38	12	0.9	162	0
2022-04-12				1928	2022	4	Spring	12	0	0	13.72	5.09	7.52	30	8	0.7	90	0
2022-04-13				1929	2022	4	Spring	13	0	0	11.68	2.64	0	19	12	0.7	111	0
2022-04-14				1930	2022	4	Spring	14	0	0	11.87	2.66	0	31	13	0.9	73	0
2022-04-15				1931	2022	4	Spring	15	0	0	11.04	3.27	0	32	12	0.7	126	0
2022-04-16				1932	2022	4	Spring	16	1	0	13	1.05	0	21	11	0.6	128	1
2022-04-17				1933	2022	4	Spring	17	1	0	12.76	2.5	0	29	10	0.6	142	0
2022-04-18				1934	2022	4	Spring	18	0	0	14.71	2.05	0.13	33	10	0.7	137	1
2022-04-19				1935	2022	4	Spring	19	0	0	16.37	1.3	0	50	12	0.8	179	0
2022-04-20				1936	2022	4	Spring	20	0	0	17.19	3.98	0	35	10	0.7	145	0
2022-04-21				1937	2022	4	Spring	21	0	0	19.11	4.34	0	24	9	0.7	123	0
2022-04-22				1938	2022	4	Spring	22	0	0	17.33	3.46	0	30	12	0.8	120	0
2022-04-23				1939	2022	4	Spring	23	1	0	18.69	2.91	0	35	13	0.9	165	0
2022-04-24				1940	2022	4	Spring	24	1	0	21.76	3.04	0.21	33	10	0.8	127	0
2022-04-25				1941	2022	4	Spring	25	0	0	21.36	1.99	0.07	39	13	1	141	1
2022-04-26				1942	2022	4	Spring	26	0	0	20.01	3.23	0.01	44	10	1	117	0
2022-04-27				1943	2022	4	Spring	27	0	0	17.88	3.72	0	23	11	0.6	119	0
2022-04-28				1944	2022	4	Spring	28	0	0	12.91	2.8	4.19	27	10	0.8	66	0
2022-04-29				1945	2022	4	Spring	29	0	0	12.18	1.58	0.02	58	7	0.9	108	0
2022-04-30				1946	2022	4	Spring	30	1	0	13.72	2.58	0	47	9	0.7	97	0
2022-05-01				1947	2022	5	Spring	1	1	0	15.41	2.63	0	28	13	0.6	123	3
2022-05-02				1948	2022	5	Spring	2	0	0	17.62	2.09	0	31	13	0.6	135	1
2022-05-03				1949	2022	5	Spring	3	0	0	20.02	2.84	0	36	15	0.8	163	0
2022-05-04				1950	2022	5	Spring	4	0	0	21.04	4.27	0	23	11	0.6	150	2
2022-05-05				1951	2022	5	Spring	5	0	0	22.16	4.75	0	22	11	0.6	159	0
2022-05-06				1952	2022	5	Spring	6	0	0	22.15	3.5	0	32	13	0.7	203	0
2022-05-07				1953	2022	5	Spring	7	1	0	17.1	3.8	0	31	10	0.6	100	0
2022-05-08				1954	2022	5	Spring	8	1	0	16.45	2.37	0.01	28	14	0.7	101	1
2022-05-09				1955	2022	5	Spring	9	0	0	12.37	1.91	2.52	47	8	0.9	64	0
2022-05-10				1956	2022	5	Spring	10	0	0	15.13	1.25	0.26	51	8	0.8	118	3
2022-05-11				1957	2022	5	Spring	11	0	0	17.06	1.49	0.01	75	11	0.9	139	2
2022-05-12				1958	2022	5	Spring	12	0	0	17.48	2.32	0.18	66	12	0.9	129	0
2022-05-13				1959	2022	5	Spring	13	0	0	16.06	2.78	2.22	38	9	0.7	131	1
2022-05-14				1960	2022	5	Spring	14	1	0	15.05	1.76	0	27	12	0.6	112	0
2022-05-15				1961	2022	5	Spring	15	1	0	18.01	2.05	0	23	14	0.6	145	1
2022-05-16				1962	2022	5	Spring	16	0	0	20.81	2.14	0	25	14	0.6	144	0
2022-05-17				1963	2022	5	Spring	17	0	0	22.15	3.6	0	23	14	0.5	162	2
2022-05-18				1964	2022	5	Spring	18	0	0	23.53	3.38	0	26	11	0.6	162	1
2022-05-19				1965	2022	5	Spring	19	0	0	22.59	2.41	0	23	11	0.6	149	1
2022-05-20				1966	2022	5	Spring	20	0	0	22.69	1.3	0	25	12	0.6	173	2
2022-05-21				1967	2022	5	Spring	21	1	0	24.09	2.3	0	26	13	0.6	185	2
2022-05-22				1968	2022	5	Spring	22	1	0	24.4	2.33	0	26	11	0.6	177	2
2022-05-23				1969	2022	5	Spring	23	0	0	25.05	1.69	0	33	13	0.7	213	5
2022-05-24				1970	2022	5	Spring	24	0	0	25.39	2.65	0	32	12	0.8	199	2
2022-05-25				1971	2022	5	Spring	25	0	0	22.73	3.29	0.25	26	10	0.7	137	1
2022-05-26				1972	2022	5	Spring	26	0	0	21.93	1.81	0	17	11	0.6	148	2
2022-05-27				1973	2022	5	Spring	27	0	0	24.48	2.55	0	22	16	0.7	187	1
2022-05-28				1974	2022	5	Spring	28	1	0	26.61	4.26	0	22	10	0.6	169	1
2022-05-29				1975	2022	5	Spring	29	1	0	26.25	4.17	0.7	20	9	0.8	148	0
2022-05-30				1976	2022	5	Spring	30	0	0	24.2	2.54	0.01	9	11	0.5	156	0
2022-05-31				1977	2022	5	Spring	31	0	0	25.38	4.32	0	20	11	0.7	185	1
2022-06-01				1978	2022	6	Summer	1	0	0	26.67	1.82	0	35	15	0.9	258	1
2022-06-02				1979	2022	6	Summer	2	0	0	29.37	1.09	0	36	15	0.8	275	0
2022-06-03				1980	2022	6	Summer	3	0	0	29.81	3.18	0	34	14	0.8	226	2
2022-06-04				1981	2022	6	Summer	4	1	0	27.81	1.99	0.01	29	10	0.7	135	2
2022-06-05				1982	2022	6	Summer	5	1	0	28.76	2.01	0.05	40	13	0.7	182	5
2022-06-06				1983	2022	6	Summer	6	0	0	25.17	3.82	0	23	12	0.6	133	2
2022-06-07				1984	2022	6	Summer	7	0	0	25.1	1.55	0	19	12	0.6	177	2
2022-06-08				1985	2022	6	Summer	8	0	0	27.74	3.27	0.02	28	13	0.7	219	3
2022-06-09				1986	2022	6	Summer	9	0	0	26.73	1.78	4.17	22	9	0.6	189	1
2022-06-10				1987	2022	6	Summer	10	0	0	23.9	1.79	6.11	32	9	0.6	142	1
2022-06-11				1988	2022	6	Summer	11	1	0	26.49	2.44	0.03	28	10	0.6	184	2
2022-06-12				1989	2022	6	Summer	12	1	0	25.89	3.41	0	21	10	0.5	153	1
2022-06-13				1990	2022	6	Summer	13	0	0	26.16	2.81	8.83	23	9	0.5	178	1
2022-06-14				1991	2022	6	Summer	14	0	0	23.3	1.79	6.9	10	8	0.5	158	2
2022-06-15				1992	2022	6	Summer	15	0	0	27.44	1.16	0.28	25	10	0.6	224	1
2022-06-16				1993	2022	6	Summer	16	0	0	30.16	2.27	2.68	39	12	0.8	260	1
2022-06-17				1994	2022	6	Summer	17	0	0	31.75	3.05	1.33	27	10	0.7	236	0
2022-06-18				1995	2022	6	Summer	18	1	0	31.63	2.21	0	21	9	0.6	228	3
2022-06-19				1996	2022	6	Summer	19	1	0	32.17	1.66	0.07	28	11	0.7	263	1
2022-06-20				1997	2022	6	Summer	20	0	0	31.95	1.86	0.02	26	13	0.6	230	2
2022-06-21				1998	2022	6	Summer	21	0	0	30.05	3.12	0	28	7	0.6	204	1
2022-06-22				1999	2022	6	Summer	22	0	0	31.49	3.1	9.52	20	8	0.6	154	4
[truncated: 192 more rows]
